# Supplementary material for: Polygenic adaptation on height is overestimated due to uncorrected stratification in genome-wide association studies
Source: eLife. 2019 Mar 21;8:e39702. doi: 10.7554/eLife.39702 (PMC6428571; doi:10.7554/eLife.39702)
Supplement: Figure 1—source data 1. [file elife-39702-fig1-data1.xlsx]

## Sheet: Figure 1a
	GIANT			UK Biobank
	Score	CI low	CI high	Score	CI low	CI high
CEU	0.645337	0.504635	0.786039	0.0486535	-0.0974756	0.194783
GBR	0.449085	0.30376	0.594409	0.0143761	-0.138584	0.167336
IBS	-0.45984	-0.59651	-0.32317	-0.104182	-0.242464	0.0341002
TSI	-0.51918	-0.653852	-0.384507	0.0469397	-0.0902212	0.184101
SP	0.730978	0.551729	0.910227	0.344039	0.176418	0.51166
HG	1.04676	0.775441	1.31808	-0.41929	-0.668877	-0.169704
EF	-1.05047	-1.22792	-0.873024	-0.1898	-0.353963	-0.0256372

## Sheet: Figure 1b
name	pvaluebin	meantSDS
giant	1	0.455016
giant	2	0.556937
giant	3	0.305309
giant	4	0.380256
giant	5	0.267995
giant	6	0.259753
giant	7	0.150049
giant	8	0.259505
giant	9	0.395373
giant	10	0.316414
giant	11	0.425242
giant	12	0.450128
giant	13	0.402861
giant	14	0.445754
giant	15	0.234444
giant	16	0.192328
giant	17	0.223288
giant	18	0.344519
giant	19	0.243658
giant	20	0.324215
giant	21	0.261322
giant	22	0.286082
giant	23	0.323965
giant	24	0.286374
giant	25	0.319506
giant	26	0.31492
giant	27	0.217985
giant	28	0.285025
giant	29	0.300761
giant	30	0.229917
giant	31	0.259177
giant	32	0.214147
giant	33	0.259861
giant	34	0.265732
giant	35	0.218316
giant	36	0.370859
giant	37	0.337571
giant	38	0.286462
giant	39	0.275643
giant	40	0.279083
giant	41	0.289235
giant	42	0.253487
giant	43	0.273064
giant	44	0.28141
giant	45	0.216572
giant	46	0.315007
giant	47	0.259559
giant	48	0.236468
giant	49	0.31911
giant	50	0.30578
giant	51	0.283157
giant	52	0.309062
giant	53	0.25897
giant	54	0.242303
giant	55	0.253905
giant	56	0.259522
giant	57	0.251664
giant	58	0.248331
giant	59	0.301516
giant	60	0.23043
giant	61	0.275491
giant	62	0.271315
giant	63	0.233736
giant	64	0.265334
giant	65	0.256191
giant	66	0.216271
giant	67	0.230561
giant	68	0.188297
giant	69	0.287598
giant	70	0.277317
giant	71	0.319629
giant	72	0.248265
giant	73	0.232313
giant	74	0.28464
giant	75	0.327215
giant	76	0.257101
giant	77	0.22375
giant	78	0.281959
giant	79	0.248195
giant	80	0.241089
giant	81	0.27172
giant	82	0.236658
giant	83	0.297134
giant	84	0.291259
giant	85	0.327993
giant	86	0.307317
giant	87	0.278521
giant	88	0.319236
giant	89	0.239977
giant	90	0.255648
giant	91	0.228837
giant	92	0.260337
giant	93	0.209218
giant	94	0.299691
giant	95	0.264238
giant	96	0.252958
giant	97	0.300314
giant	98	0.337937
giant	99	0.287727
giant	100	0.310122
giant	101	0.297666
giant	102	0.222551
giant	103	0.29728
giant	104	0.340741
giant	105	0.329481
giant	106	0.292471
giant	107	0.240125
giant	108	0.246607
giant	109	0.255547
giant	110	0.224317
giant	111	0.238286
giant	112	0.243116
giant	113	0.232978
giant	114	0.264293
giant	115	0.302692
giant	116	0.327972
giant	117	0.268849
giant	118	0.320607
giant	119	0.333412
giant	120	0.308499
giant	121	0.319676
giant	122	0.332279
giant	123	0.265107
giant	124	0.332186
giant	125	0.329248
giant	126	0.233495
giant	127	0.287039
giant	128	0.245112
giant	129	0.255697
giant	130	0.221419
giant	131	0.227393
giant	132	0.257775
giant	133	0.257349
giant	134	0.279488
giant	135	0.369261
giant	136	0.24511
giant	137	0.286414
giant	138	0.243835
giant	139	0.322074
giant	140	0.245546
giant	141	0.271003
giant	142	0.308704
giant	143	0.296584
giant	144	0.219104
giant	145	0.207319
giant	146	0.295225
giant	147	0.252821
giant	148	0.26284
giant	149	0.246661
giant	150	0.234896
giant	151	0.237055
giant	152	0.259016
giant	153	0.24329
giant	154	0.231507
giant	155	0.232948
giant	156	0.284283
giant	157	0.246781
giant	158	0.2695
giant	159	0.226014
giant	160	0.300398
giant	161	0.218425
giant	162	0.227482
giant	163	0.19158
giant	164	0.236022
giant	165	0.290895
giant	166	0.242846
giant	167	0.267499
giant	168	0.258169
giant	169	0.281488
giant	170	0.294823
giant	171	0.267375
giant	172	0.244398
giant	173	0.261184
giant	174	0.301491
giant	175	0.296331
giant	176	0.201682
giant	177	0.254095
giant	178	0.221793
giant	179	0.339654
giant	180	0.202421
giant	181	0.259947
giant	182	0.266649
giant	183	0.236454
giant	184	0.24766
giant	185	0.241037
giant	186	0.241447
giant	187	0.275179
giant	188	0.27941
giant	189	0.275591
giant	190	0.246022
giant	191	0.289096
giant	192	0.241444
giant	193	0.318124
giant	194	0.271485
giant	195	0.264746
giant	196	0.328389
giant	197	0.275888
giant	198	0.283434
giant	199	0.290671
giant	200	0.268813
giant	201	0.264184
giant	202	0.302622
giant	203	0.282437
giant	204	0.237345
giant	205	0.292355
giant	206	0.225253
giant	207	0.318942
giant	208	0.276136
giant	209	0.258007
giant	210	0.306732
giant	211	0.28052
giant	212	0.269248
giant	213	0.255555
giant	214	0.272918
giant	215	0.212285
giant	216	0.249757
giant	217	0.215241
giant	218	0.234643
giant	219	0.283718
giant	220	0.247798
giant	221	0.243379
giant	222	0.279716
giant	223	0.277776
giant	224	0.224967
giant	225	0.291415
giant	226	0.220116
giant	227	0.204777
giant	228	0.231413
giant	229	0.258121
giant	230	0.30859
giant	231	0.258942
giant	232	0.272207
giant	233	0.243959
giant	234	0.213699
giant	235	0.225969
giant	236	0.189286
giant	237	0.237853
giant	238	0.25893
giant	239	0.283609
giant	240	0.262145
giant	241	0.267343
giant	242	0.300134
giant	243	0.209467
giant	244	0.203535
giant	245	0.265194
giant	246	0.262892
giant	247	0.24051
giant	248	0.236329
giant	249	0.220605
giant	250	0.248617
giant	251	0.2722
giant	252	0.217229
giant	253	0.234457
giant	254	0.241456
giant	255	0.215534
giant	256	0.207745
giant	257	0.205798
giant	258	0.218873
giant	259	0.226831
giant	260	0.222768
giant	261	0.218566
giant	262	0.226662
giant	263	0.247501
giant	264	0.254658
giant	265	0.227135
giant	266	0.256696
giant	267	0.206861
giant	268	0.181618
giant	269	0.322427
giant	270	0.245441
giant	271	0.258416
giant	272	0.230149
giant	273	0.302789
giant	274	0.239918
giant	275	0.255641
giant	276	0.311486
giant	277	0.252918
giant	278	0.235324
giant	279	0.180535
giant	280	0.18074
giant	281	0.196328
giant	282	0.269738
giant	283	0.241067
giant	284	0.155334
giant	285	0.254103
giant	286	0.245959
giant	287	0.245631
giant	288	0.222375
giant	289	0.226066
giant	290	0.206541
giant	291	0.233956
giant	292	0.151672
giant	293	0.253224
giant	294	0.146038
giant	295	0.201354
giant	296	0.163831
giant	297	0.232621
giant	298	0.238606
giant	299	0.255437
giant	300	0.190643
giant	301	0.246019
giant	302	0.245281
giant	303	0.207306
giant	304	0.263678
giant	305	0.186698
giant	306	0.191278
giant	307	0.184404
giant	308	0.215221
giant	309	0.261204
giant	310	0.144239
giant	311	0.17127
giant	312	0.232538
giant	313	0.197757
giant	314	0.217572
giant	315	0.228606
giant	316	0.211383
giant	317	0.210301
giant	318	0.205528
giant	319	0.211516
giant	320	0.256239
giant	321	0.177997
giant	322	0.221031
giant	323	0.187775
giant	324	0.216603
giant	325	0.225925
giant	326	0.228837
giant	327	0.197842
giant	328	0.204721
giant	329	0.256022
giant	330	0.218209
giant	331	0.19809
giant	332	0.178993
giant	333	0.205934
giant	334	0.195403
giant	335	0.172338
giant	336	0.147337
giant	337	0.220517
giant	338	0.244076
giant	339	0.253875
giant	340	0.229747
giant	341	0.237029
giant	342	0.235598
giant	343	0.278381
giant	344	0.253293
giant	345	0.220863
giant	346	0.180788
giant	347	0.199841
giant	348	0.196008
giant	349	0.238235
giant	350	0.185951
giant	351	0.245958
giant	352	0.242053
giant	353	0.187409
giant	354	0.251366
giant	355	0.163786
giant	356	0.213031
giant	357	0.199476
giant	358	0.21742
giant	359	0.193696
giant	360	0.218115
giant	361	0.230486
giant	362	0.186909
giant	363	0.166183
giant	364	0.247742
giant	365	0.240066
giant	366	0.197017
giant	367	0.222501
giant	368	0.197313
giant	369	0.189922
giant	370	0.194562
giant	371	0.150538
giant	372	0.209319
giant	373	0.172547
giant	374	0.212974
giant	375	0.179797
giant	376	0.209179
giant	377	0.229944
giant	378	0.226228
giant	379	0.223023
giant	380	0.283524
giant	381	0.212581
giant	382	0.19941
giant	383	0.203854
giant	384	0.1906
giant	385	0.160055
giant	386	0.191208
giant	387	0.250203
giant	388	0.191461
giant	389	0.207689
giant	390	0.219277
giant	391	0.218772
giant	392	0.216645
giant	393	0.21202
giant	394	0.22061
giant	395	0.221312
giant	396	0.174465
giant	397	0.183347
giant	398	0.232078
giant	399	0.228868
giant	400	0.248156
giant	401	0.202346
giant	402	0.20219
giant	403	0.196429
giant	404	0.175553
giant	405	0.179986
giant	406	0.266682
giant	407	0.22896
giant	408	0.187192
giant	409	0.251752
giant	410	0.209327
giant	411	0.237152
giant	412	0.195343
giant	413	0.25362
giant	414	0.279944
giant	415	0.19987
giant	416	0.171836
giant	417	0.152548
giant	418	0.160114
giant	419	0.192344
giant	420	0.160089
giant	421	0.164191
giant	422	0.221384
giant	423	0.238088
giant	424	0.169342
giant	425	0.126393
giant	426	0.196497
giant	427	0.217294
giant	428	0.227841
giant	429	0.170459
giant	430	0.155082
giant	431	0.186223
giant	432	0.166556
giant	433	0.133695
giant	434	0.116749
giant	435	0.204753
giant	436	0.209442
giant	437	0.133059
giant	438	0.189876
giant	439	0.183424
giant	440	0.194737
giant	441	0.237227
giant	442	0.205406
giant	443	0.163747
giant	444	0.216674
giant	445	0.230533
giant	446	0.235564
giant	447	0.185779
giant	448	0.237848
giant	449	0.198832
giant	450	0.201359
giant	451	0.163174
giant	452	0.192221
giant	453	0.178866
giant	454	0.167884
giant	455	0.186579
giant	456	0.145012
giant	457	0.163104
giant	458	0.208482
giant	459	0.203316
giant	460	0.162088
giant	461	0.191727
giant	462	0.15595
giant	463	0.216332
giant	464	0.17515
giant	465	0.163624
giant	466	0.155194
giant	467	0.166739
giant	468	0.133826
giant	469	0.222229
giant	470	0.179303
giant	471	0.130829
giant	472	0.215926
giant	473	0.184526
giant	474	0.201807
giant	475	0.184979
giant	476	0.207657
giant	477	0.128399
giant	478	0.125976
giant	479	0.103032
giant	480	0.198835
giant	481	0.153162
giant	482	0.15896
giant	483	0.215578
giant	484	0.14716
giant	485	0.196055
giant	486	0.143475
giant	487	0.23456
giant	488	0.184323
giant	489	0.205382
giant	490	0.176158
giant	491	0.192861
giant	492	0.227431
giant	493	0.179121
giant	494	0.178973
giant	495	0.182008
giant	496	0.135099
giant	497	0.19312
giant	498	0.214724
giant	499	0.145376
giant	500	0.209355
giant	501	0.157177
giant	502	0.165559
giant	503	0.129148
giant	504	0.161705
giant	505	0.138981
giant	506	0.11567
giant	507	0.190802
giant	508	0.174893
giant	509	0.149318
giant	510	0.215941
giant	511	0.122129
giant	512	0.226344
giant	513	0.153027
giant	514	0.202138
giant	515	0.159859
giant	516	0.174731
giant	517	0.164379
giant	518	0.213552
giant	519	0.121599
giant	520	0.0781417
giant	521	0.168682
giant	522	0.161722
giant	523	0.138203
giant	524	0.204313
giant	525	0.137537
giant	526	0.140163
giant	527	0.177682
giant	528	0.183812
giant	529	0.178257
giant	530	0.144867
giant	531	0.150667
giant	532	0.176451
giant	533	0.179189
giant	534	0.20541
giant	535	0.156345
giant	536	0.201952
giant	537	0.127296
giant	538	0.116534
giant	539	0.130294
giant	540	0.126812
giant	541	0.103143
giant	542	0.161627
giant	543	0.168617
giant	544	0.168088
giant	545	0.219279
giant	546	0.211957
giant	547	0.146791
giant	548	0.175177
giant	549	0.207625
giant	550	0.132697
giant	551	0.186572
giant	552	0.150878
giant	553	0.175492
giant	554	0.196957
giant	555	0.139577
giant	556	0.134403
giant	557	0.205216
giant	558	0.140188
giant	559	0.221709
giant	560	0.22215
giant	561	0.172623
giant	562	0.165563
giant	563	0.183727
giant	564	0.159059
giant	565	0.160686
giant	566	0.137778
giant	567	0.168131
giant	568	0.166706
giant	569	0.192859
giant	570	0.187583
giant	571	0.15116
giant	572	0.165982
giant	573	0.183602
giant	574	0.163789
giant	575	0.141801
giant	576	0.102575
giant	577	0.145873
giant	578	0.142078
giant	579	0.158774
giant	580	0.165288
giant	581	0.11916
giant	582	0.184247
giant	583	0.186525
giant	584	0.164082
giant	585	0.0963893
giant	586	0.176351
giant	587	0.142922
giant	588	0.160767
giant	589	0.169734
giant	590	0.173823
giant	591	0.153825
giant	592	0.165519
giant	593	0.157845
giant	594	0.169765
giant	595	0.13152
giant	596	0.0873578
giant	597	0.148699
giant	598	0.111637
giant	599	0.150341
giant	600	0.173058
giant	601	0.161923
giant	602	0.171343
giant	603	0.122706
giant	604	0.172498
giant	605	0.0471493
giant	606	0.151604
giant	607	0.172088
giant	608	0.157336
giant	609	0.124039
giant	610	0.146904
giant	611	0.104447
giant	612	0.120227
giant	613	0.123844
giant	614	0.147587
giant	615	0.125857
giant	616	0.132627
giant	617	0.197042
giant	618	0.167721
giant	619	0.141248
giant	620	0.173035
giant	621	0.12518
giant	622	0.143633
giant	623	0.185114
giant	624	0.156738
giant	625	0.104597
giant	626	0.145551
giant	627	0.175282
giant	628	0.125203
giant	629	0.159683
giant	630	0.173759
giant	631	0.147227
giant	632	0.159148
giant	633	0.110995
giant	634	0.0955065
giant	635	0.174385
giant	636	0.152219
giant	637	0.122656
giant	638	0.0682327
giant	639	0.187846
giant	640	0.19074
giant	641	0.169432
giant	642	0.163485
giant	643	0.193936
giant	644	0.163256
giant	645	0.155974
giant	646	0.113683
giant	647	0.0932806
giant	648	0.150404
giant	649	0.105928
giant	650	0.143324
giant	651	0.144999
giant	652	0.151631
giant	653	0.131634
giant	654	0.123654
giant	655	0.149831
giant	656	0.0938532
giant	657	0.135829
giant	658	0.164679
giant	659	0.140774
giant	660	0.0852886
giant	661	0.102394
giant	662	0.191966
giant	663	0.148309
giant	664	0.145099
giant	665	0.109424
giant	666	0.107631
giant	667	0.0930923
giant	668	0.176452
giant	669	0.123099
giant	670	0.124461
giant	671	0.146178
giant	672	0.099306
giant	673	0.135462
giant	674	0.13626
giant	675	0.089045
giant	676	0.13944
giant	677	0.115026
giant	678	0.192731
giant	679	0.0682578
giant	680	0.088856
giant	681	0.0981221
giant	682	0.168775
giant	683	0.117758
giant	684	0.151807
giant	685	0.103799
giant	686	0.11535
giant	687	0.167364
giant	688	0.112275
giant	689	0.0929525
giant	690	0.154003
giant	691	0.11304
giant	692	0.0947181
giant	693	0.200287
giant	694	0.108559
giant	695	0.114779
giant	696	0.115643
giant	697	0.165319
giant	698	0.108476
giant	699	0.108951
giant	700	0.111688
giant	701	0.151153
giant	702	0.157505
giant	703	0.204231
giant	704	0.156065
giant	705	0.0963283
giant	706	0.057701
giant	707	0.114904
giant	708	0.0990174
giant	709	0.146827
giant	710	0.168541
giant	711	0.109691
giant	712	0.0796032
giant	713	0.11203
giant	714	0.14838
giant	715	0.160898
giant	716	0.133637
giant	717	0.103598
giant	718	0.0394639
giant	719	0.0886965
giant	720	0.132828
giant	721	0.100963
giant	722	0.108174
giant	723	0.164795
giant	724	0.105808
giant	725	0.264451
giant	726	0.139321
giant	727	0.140477
giant	728	0.150987
giant	729	0.0885422
giant	730	0.15799
giant	731	0.0821198
giant	732	0.129898
giant	733	0.166615
giant	734	0.140885
giant	735	0.119259
giant	736	0.16236
giant	737	0.128952
giant	738	0.222407
giant	739	0.0969809
giant	740	0.1055
giant	741	0.151021
giant	742	0.109066
giant	743	0.115218
giant	744	0.135334
giant	745	0.132573
giant	746	0.0906391
giant	747	0.0903654
giant	748	0.106079
giant	749	0.0705255
giant	750	0.138463
giant	751	0.104009
giant	752	0.130412
giant	753	0.197689
giant	754	0.156535
giant	755	0.126653
giant	756	0.100113
giant	757	0.148429
giant	758	0.0884874
giant	759	0.108729
giant	760	0.120967
giant	761	0.160523
giant	762	0.0504988
giant	763	0.189017
giant	764	0.13375
giant	765	0.119777
giant	766	0.123438
giant	767	0.124629
giant	768	0.168092
giant	769	0.0831184
giant	770	0.164958
giant	771	0.130926
giant	772	0.179613
giant	773	0.177479
giant	774	0.148088
giant	775	0.132215
giant	776	0.166547
giant	777	0.0763114
giant	778	0.0892615
giant	779	0.200244
giant	780	0.141774
giant	781	0.197949
giant	782	0.149597
giant	783	0.0676785
giant	784	0.117149
giant	785	0.133666
giant	786	0.192059
giant	787	0.105993
giant	788	0.133644
giant	789	0.129178
giant	790	0.157278
giant	791	0.112621
giant	792	0.160648
giant	793	0.167115
giant	794	0.109202
giant	795	0.117672
giant	796	0.141321
giant	797	0.116984
giant	798	0.142255
giant	799	0.126192
giant	800	0.181751
giant	801	0.11696
giant	802	0.132644
giant	803	0.164137
giant	804	0.133638
giant	805	0.075351
giant	806	0.129468
giant	807	0.158433
giant	808	0.121802
giant	809	0.142638
giant	810	0.165717
giant	811	0.157458
giant	812	0.148643
giant	813	0.164061
giant	814	0.139177
giant	815	0.132789
giant	816	0.115662
giant	817	0.132317
giant	818	0.124826
giant	819	0.170425
giant	820	0.0838457
giant	821	0.119844
giant	822	0.222244
giant	823	0.12385
giant	824	0.133519
giant	825	0.157597
giant	826	0.116018
giant	827	0.130412
giant	828	0.119933
giant	829	0.158862
giant	830	0.125384
giant	831	0.155511
giant	832	0.132442
giant	833	0.11823
giant	834	0.170695
giant	835	0.086958
giant	836	0.105448
giant	837	0.18217
giant	838	0.101668
giant	839	0.12314
giant	840	0.218805
giant	841	0.151095
giant	842	0.091829
giant	843	0.196469
giant	844	0.132188
giant	845	0.099757
giant	846	0.135175
giant	847	0.138078
giant	848	0.133539
giant	849	0.183402
giant	850	0.106868
giant	851	0.107295
giant	852	0.191163
giant	853	0.0764403
giant	854	0.0872141
giant	855	0.107756
giant	856	0.185126
giant	857	0.125081
giant	858	0.135832
giant	859	0.187079
giant	860	0.128374
giant	861	0.152618
giant	862	0.17185
giant	863	0.0910766
giant	864	0.151421
giant	865	0.0816429
giant	866	0.10604
giant	867	0.125742
giant	868	0.0886653
giant	869	0.127272
giant	870	0.161157
giant	871	0.170737
giant	872	0.130864
giant	873	0.174758
giant	874	0.133499
giant	875	0.0856077
giant	876	0.120808
giant	877	0.157738
giant	878	0.11693
giant	879	0.109951
giant	880	0.130746
giant	881	0.138619
giant	882	0.123673
giant	883	0.0970314
giant	884	0.162213
giant	885	0.114303
giant	886	0.1596
giant	887	0.0705861
giant	888	0.115117
giant	889	0.187615
giant	890	0.13868
giant	891	0.101342
giant	892	0.151438
giant	893	0.123164
giant	894	0.14153
giant	895	0.0418495
giant	896	0.070304
giant	897	0.082542
giant	898	0.106034
giant	899	0.165068
giant	900	0.105198
giant	901	0.0675464
giant	902	0.0591308
giant	903	0.137251
giant	904	0.0830463
giant	905	0.140505
giant	906	0.0310385
giant	907	0.114719
giant	908	0.110223
giant	909	0.132012
giant	910	0.0738428
giant	911	0.0868375
giant	912	0.0788909
giant	913	0.140608
giant	914	0.138737
giant	915	0.0593099
giant	916	0.113916
giant	917	0.163254
giant	918	0.0883398
giant	919	0.160042
giant	920	0.119051
giant	921	0.13917
giant	922	0.115514
giant	923	0.114744
giant	924	0.131959
giant	925	0.119009
giant	926	0.101738
giant	927	0.0521134
giant	928	0.123205
giant	929	0.158547
giant	930	0.0897676
giant	931	0.100843
giant	932	0.168101
giant	933	0.139512
giant	934	0.151611
giant	935	0.149887
giant	936	0.14129
giant	937	0.13446
giant	938	0.13498
giant	939	0.137669
giant	940	0.0988703
giant	941	0.116858
giant	942	0.129676
giant	943	0.132269
giant	944	0.0753095
giant	945	0.158993
giant	946	0.0767493
giant	947	0.188571
giant	948	0.0819212
giant	949	0.131864
giant	950	0.168451
giant	951	0.123202
giant	952	0.0916685
giant	953	0.0634867
giant	954	0.12313
giant	955	0.0790432
giant	956	0.0748113
giant	957	0.0964278
giant	958	0.086534
giant	959	0.105783
giant	960	0.158389
giant	961	0.132142
giant	962	0.100611
giant	963	0.149506
giant	964	0.177525
giant	965	0.120956
giant	966	0.0459098
giant	967	0.123066
giant	968	0.108132
giant	969	0.138642
giant	970	0.137391
giant	971	0.130069
giant	972	0.162359
giant	973	0.10914
giant	974	0.203283
giant	975	0.10868
giant	976	0.120871
giant	977	0.108071
giant	978	0.0719321
giant	979	0.111161
giant	980	0.126505
giant	981	0.113935
giant	982	0.1196
giant	983	0.0982121
giant	984	0.110502
giant	985	0.0463748
giant	986	0.134675
giant	987	0.0913263
giant	988	0.131814
giant	989	0.0955978
giant	990	0.117674
giant	991	0.15403
giant	992	0.13827
giant	993	0.0882542
giant	994	0.0722913
giant	995	0.109939
giant	996	0.125913
giant	997	0.095158
giant	998	0.109675
giant	999	0.0708739
giant	1000	0.079847
giant	1001	0.0907937
giant	1002	0.102741
giant	1003	0.135297
giant	1004	0.0673881
giant	1005	0.0896892
giant	1006	0.0583259
giant	1007	0.0674753
giant	1008	0.065483
giant	1009	0.0847426
giant	1010	0.117993
giant	1011	0.153221
giant	1012	0.112335
giant	1013	0.0949558
giant	1014	0.114561
giant	1015	0.14084
giant	1016	0.122872
giant	1017	0.0953706
giant	1018	0.0669959
giant	1019	0.136505
giant	1020	0.110963
giant	1021	0.113766
giant	1022	0.143255
giant	1023	0.117433
giant	1024	0.13433
giant	1025	0.117258
giant	1026	0.0897246
giant	1027	0.0973417
giant	1028	0.0900157
giant	1029	0.0530353
giant	1030	0.124672
giant	1031	0.0797188
giant	1032	0.0931294
giant	1033	0.106185
giant	1034	0.105879
giant	1035	0.113161
giant	1036	0.10236
giant	1037	0.0992371
giant	1038	0.0727037
giant	1039	0.115596
giant	1040	0.138056
giant	1041	0.0849158
giant	1042	0.143719
giant	1043	0.0957528
giant	1044	0.12922
giant	1045	0.0877398
giant	1046	0.0992106
giant	1047	0.112086
giant	1048	0.106752
giant	1049	0.125588
giant	1050	0.0999477
giant	1051	0.136398
giant	1052	0.15239
giant	1053	0.112185
giant	1054	0.083479
giant	1055	0.10366
giant	1056	0.130712
giant	1057	0.113829
giant	1058	0.0906187
giant	1059	0.157513
giant	1060	0.113526
giant	1061	0.105551
giant	1062	0.0954566
giant	1063	0.119588
giant	1064	0.0984186
giant	1065	0.101777
giant	1066	0.12335
giant	1067	0.0748892
giant	1068	0.106414
giant	1069	0.149087
giant	1070	0.0935781
giant	1071	0.0548895
giant	1072	0.0812877
giant	1073	0.0708796
giant	1074	0.103155
giant	1075	0.0744049
giant	1076	0.117467
giant	1077	0.042899
giant	1078	0.14048
giant	1079	0.102477
giant	1080	0.151877
giant	1081	0.0987582
giant	1082	0.0858745
giant	1083	0.0575297
giant	1084	0.0952405
giant	1085	0.0666907
giant	1086	0.104579
giant	1087	0.0646298
giant	1088	0.113679
giant	1089	0.0915057
giant	1090	0.0426479
giant	1091	0.092888
giant	1092	0.125749
giant	1093	0.0904977
giant	1094	0.0976761
giant	1095	0.144076
giant	1096	0.0434944
giant	1097	0.139533
giant	1098	0.0929353
giant	1099	0.122005
giant	1100	0.0329059
giant	1101	0.0683119
giant	1102	0.0782672
giant	1103	0.0993341
giant	1104	0.14828
giant	1105	0.0899911
giant	1106	0.0365913
giant	1107	0.0980925
giant	1108	0.0921341
giant	1109	0.092944
giant	1110	0.0840254
giant	1111	0.0790867
giant	1112	0.0998212
giant	1113	0.0546005
giant	1114	0.111307
giant	1115	0.116275
giant	1116	0.165464
giant	1117	0.118091
giant	1118	0.12234
giant	1119	0.0711642
giant	1120	0.100478
giant	1121	0.139737
giant	1122	0.0895545
giant	1123	0.0649911
giant	1124	0.101253
giant	1125	0.0816134
giant	1126	0.17127
giant	1127	0.121152
giant	1128	0.103991
giant	1129	0.0542618
giant	1130	0.0913794
giant	1131	0.130417
giant	1132	0.0389298
giant	1133	0.100869
giant	1134	0.117425
giant	1135	0.0910303
giant	1136	0.118908
giant	1137	0.106974
giant	1138	0.0605453
giant	1139	0.0912172
giant	1140	0.104586
giant	1141	0.075296
giant	1142	0.0646444
giant	1143	0.0967169
giant	1144	0.0884203
giant	1145	0.104475
giant	1146	0.0963399
giant	1147	0.0964037
giant	1148	0.102155
giant	1149	0.0583272
giant	1150	0.0230094
giant	1151	0.16813
giant	1152	0.100959
giant	1153	0.041784
giant	1154	0.0614336
giant	1155	0.114901
giant	1156	0.0920836
giant	1157	0.125927
giant	1158	0.0637001
giant	1159	0.134764
giant	1160	0.110371
giant	1161	0.0736259
giant	1162	0.135947
giant	1163	0.0836662
giant	1164	0.10499
giant	1165	0.0518748
giant	1166	0.130252
giant	1167	0.094934
giant	1168	0.0200403
giant	1169	0.111719
giant	1170	0.0317695
giant	1171	0.124822
giant	1172	0.110214
giant	1173	0.029393
giant	1174	0.150522
giant	1175	0.0881009
giant	1176	0.0813817
giant	1177	0.12935
giant	1178	0.0569868
giant	1179	0.104412
giant	1180	0.0859758
giant	1181	0.076791
giant	1182	0.0753206
giant	1183	0.119033
giant	1184	0.0674279
giant	1185	0.0452259
giant	1186	0.0929574
giant	1187	0.0947681
giant	1188	0.118883
giant	1189	0.110608
giant	1190	0.0590253
giant	1191	0.0980117
giant	1192	0.0513433
giant	1193	0.0626402
giant	1194	0.0732182
giant	1195	0.109898
giant	1196	0.122995
giant	1197	0.0868788
giant	1198	0.10589
giant	1199	0.096962
giant	1200	0.0733076
giant	1201	0.113355
giant	1202	0.131781
giant	1203	0.0739881
giant	1204	0.116523
giant	1205	0.118547
giant	1206	0.0970406
giant	1207	0.0897411
giant	1208	0.126108
giant	1209	0.00941328
giant	1210	0.0754036
giant	1211	0.0813468
giant	1212	0.0594911
giant	1213	0.108275
giant	1214	0.0959796
giant	1215	0.0653015
giant	1216	0.100962
giant	1217	0.0175296
giant	1218	0.0587261
giant	1219	0.0601665
giant	1220	0.0790698
giant	1221	0.018629
giant	1222	0.0910455
giant	1223	0.0657311
giant	1224	0.0679564
giant	1225	0.0970437
giant	1226	0.0701901
giant	1227	0.137468
giant	1228	0.118023
giant	1229	0.0727915
giant	1230	0.0268404
giant	1231	0.116206
giant	1232	0.11115
giant	1233	0.0737078
giant	1234	0.0460978
giant	1235	0.0463699
giant	1236	0.077602
giant	1237	0.0609498
giant	1238	0.12543
giant	1239	0.0781341
giant	1240	0.0996261
giant	1241	0.0701319
giant	1242	0.121301
giant	1243	0.104658
giant	1244	0.11684
giant	1245	0.0311872
giant	1246	0.058914
giant	1247	0.121243
giant	1248	0.103502
giant	1249	0.111894
giant	1250	0.136279
giant	1251	0.0800378
giant	1252	0.0918982
giant	1253	0.0614204
giant	1254	0.112215
giant	1255	0.137516
giant	1256	0.114931
giant	1257	0.069993
giant	1258	0.0981113
giant	1259	0.0980808
giant	1260	0.124573
giant	1261	0.0506459
giant	1262	0.0697455
giant	1263	0.06323
giant	1264	0.0360027
giant	1265	0.0958203
giant	1266	0.0749646
giant	1267	0.115361
giant	1268	0.0539381
giant	1269	0.107812
giant	1270	0.0992977
giant	1271	0.0983758
giant	1272	0.117748
giant	1273	0.0527916
giant	1274	0.124807
giant	1275	0.0666553
giant	1276	0.0436626
giant	1277	0.0972504
giant	1278	0.118559
giant	1279	0.0953338
giant	1280	0.0728427
giant	1281	0.0402517
giant	1282	0.0817157
giant	1283	0.0869846
giant	1284	0.0942413
giant	1285	0.0338402
giant	1286	0.111515
giant	1287	0.0880684
giant	1288	0.0401353
giant	1289	0.0667522
giant	1290	0.0858065
giant	1291	0.0815901
giant	1292	0.0719401
giant	1293	0.00955587
giant	1294	0.06712
giant	1295	0.0877334
giant	1296	0.0740675
giant	1297	0.0385174
giant	1298	0.088147
giant	1299	0.0359098
giant	1300	0.0885338
giant	1301	0.0531656
giant	1302	0.127448
giant	1303	0.0706849
giant	1304	0.114031
giant	1305	0.0755483
giant	1306	0.0333365
giant	1307	0.0963887
giant	1308	0.0666246
giant	1309	0.0578312
giant	1310	0.109496
giant	1311	0.104961
giant	1312	0.106602
giant	1313	0.0937346
giant	1314	0.0689094
giant	1315	0.0481031
giant	1316	0.0534803
giant	1317	0.063431
giant	1318	0.0585015
giant	1319	0.0614492
giant	1320	0.133445
giant	1321	0.0966986
giant	1322	0.0458256
giant	1323	0.0480851
giant	1324	0.0648381
giant	1325	0.054136
giant	1326	0.0852985
giant	1327	0.0529846
giant	1328	0.0333384
giant	1329	0.0855613
giant	1330	0.0184677
giant	1331	-0.0153025
giant	1332	0.062842
giant	1333	0.0640837
giant	1334	0.0859515
giant	1335	0.0992128
giant	1336	0.052312
giant	1337	0.0505905
giant	1338	0.0458484
giant	1339	0.0484771
giant	1340	0.119405
giant	1341	0.058883
giant	1342	0.0411679
giant	1343	-0.00464479
giant	1344	0.0464853
giant	1345	0.050805
giant	1346	0.075313
giant	1347	0.134598
giant	1348	0.0604524
giant	1349	0.128135
giant	1350	0.0476742
giant	1351	0.0752794
giant	1352	0.0974252
giant	1353	0.059672
giant	1354	0.0878981
giant	1355	0.0823196
giant	1356	0.0477704
giant	1357	0.06884
giant	1358	0.0825558
giant	1359	0.0519269
giant	1360	0.100436
giant	1361	0.0254721
giant	1362	0.0338421
giant	1363	0.0834869
giant	1364	0.0404282
giant	1365	0.0740365
giant	1366	0.124066
giant	1367	0.0539386
giant	1368	0.145112
giant	1369	0.0714124
giant	1370	0.0381337
giant	1371	0.041537
giant	1372	0.0816755
giant	1373	0.0738337
giant	1374	0.101968
giant	1375	0.0729217
giant	1376	0.0460518
giant	1377	0.042087
giant	1378	0.0678742
giant	1379	0.0437224
giant	1380	0.0336445
giant	1381	0.148453
giant	1382	0.0230528
giant	1383	0.0344939
giant	1384	0.0343719
giant	1385	0.0583161
giant	1386	0.055994
giant	1387	0.0800862
giant	1388	0.0884354
giant	1389	0.0515113
giant	1390	0.0201059
giant	1391	0.021276
giant	1392	0.0728178
giant	1393	0.0696586
giant	1394	0.0918883
giant	1395	0.0664134
giant	1396	0.0533336
giant	1397	0.136229
giant	1398	0.0694523
giant	1399	0.0677122
giant	1400	0.0675104
giant	1401	0.0926581
giant	1402	0.0944122
giant	1403	-0.0329585
giant	1404	0.0652669
giant	1405	0.0417193
giant	1406	0.0549357
giant	1407	0.0191052
giant	1408	-0.00152322
giant	1409	0.0366681
giant	1410	0.0179819
giant	1411	0.0530531
giant	1412	0.0825979
giant	1413	0.0301733
giant	1414	0.0294962
giant	1415	0.11008
giant	1416	0.0484155
giant	1417	0.0780418
giant	1418	0.0581364
giant	1419	0.0344149
giant	1420	0.06903
giant	1421	0.0547046
giant	1422	0.0699292
giant	1423	-0.0366972
giant	1424	0.0378135
giant	1425	0.0231648
giant	1426	0.0401183
giant	1427	0.0302913
giant	1428	-0.00183342
giant	1429	0.00696891
giant	1430	0.104821
giant	1431	0.0892491
giant	1432	0.100027
giant	1433	0.0469834
giant	1434	0.0526104
giant	1435	0.040229
giant	1436	0.0424143
giant	1437	0.0624732
giant	1438	0.0612038
giant	1439	0.152356
giant	1440	0.0655849
giant	1441	0.100826
giant	1442	0.0558339
giant	1443	0.0361778
giant	1444	0.0168327
giant	1445	0.063736
giant	1446	0.0503857
giant	1447	0.0496654
giant	1448	0.0529905
giant	1449	0.0433194
giant	1450	0.0726486
giant	1451	0.0471773
giant	1452	0.00186373
giant	1453	0.086401
giant	1454	0.0177474
giant	1455	0.0870645
giant	1456	0.0161892
giant	1457	0.0875351
giant	1458	0.0826611
giant	1459	0.0728338
giant	1460	0.0246077
giant	1461	0.026185
giant	1462	0.0209881
giant	1463	0.099002
giant	1464	0.0399935
giant	1465	0.0290296
giant	1466	0.0308802
giant	1467	0.0683363
giant	1468	0.0311753
giant	1469	-0.0119416
giant	1470	0.132627
giant	1471	0.0564251
giant	1472	0.0411764
giant	1473	0.0366688
giant	1474	0.0412947
giant	1475	0.00344692
giant	1476	0.0304676
giant	1477	0.0655899
giant	1478	0.0100019
giant	1479	0.0594945
giant	1480	0.0362971
giant	1481	0.0464367
giant	1482	0.043574
giant	1483	0.0123468
giant	1484	0.0603442
giant	1485	0.0447149
giant	1486	0.0713709
giant	1487	0.0598803
giant	1488	0.00861054
giant	1489	0.0607052
giant	1490	0.111443
giant	1491	0.0767293
giant	1492	0.02705
giant	1493	0.0305872
giant	1494	0.0388202
giant	1495	0.0516564
giant	1496	0.0414392
giant	1497	0.00134529
giant	1498	0.0373088
giant	1499	0.100512
giant	1500	0.0592104
giant	1501	0.0181021
giant	1502	0.0497688
giant	1503	0.0757595
giant	1504	0.00693045
giant	1505	0.021829
giant	1506	0.0575519
giant	1507	0.0389262
giant	1508	0.0738023
giant	1509	0.00206388
giant	1510	0.0793998
giant	1511	0.0488909
giant	1512	0.030192
giant	1513	0.0334907
giant	1514	0.0921578
giant	1515	0.0214631
giant	1516	0.0420093
giant	1517	0.101811
giant	1518	0.036711
giant	1519	0.00627911
giant	1520	0.00559282
giant	1521	0.0261144
giant	1522	-0.0304183
giant	1523	0.0737075
giant	1524	0.0558335
giant	1525	0.032945
giant	1526	0.07053
giant	1527	0.0684448
giant	1528	0.0835217
giant	1529	0.0143364
giant	1530	-0.00351867
giant	1531	0.0189754
giant	1532	0.0343777
giant	1533	0.02976
giant	1534	0.0280641
giant	1535	0.0679805
giant	1536	0.0507514
giant	1537	0.0773455
giant	1538	0.0330281
giant	1539	0.0118814
giant	1540	-0.0222064
giant	1541	0.0718859
giant	1542	0.067695
giant	1543	0.0256681
giant	1544	0.00136057
giant	1545	0.0111098
giant	1546	0.092831
giant	1547	0.0511837
giant	1548	0.0150009
giant	1549	0.0809144
giant	1550	0.0575366
giant	1551	0.0228461
giant	1552	0.0523113
giant	1553	0.0208976
giant	1554	0.0339219
giant	1555	0.0668771
giant	1556	0.0653546
giant	1557	0.0523327
giant	1558	0.029879
giant	1559	5.15868e-05
giant	1560	0.0275885
giant	1561	0.0619725
giant	1562	-0.00399266
giant	1563	0.00909024
giant	1564	0.0816806
giant	1565	0.0977755
giant	1566	0.0343393
giant	1567	0.00572345
giant	1568	0.0119658
giant	1569	0.0373203
giant	1570	0.0114565
giant	1571	0.0442708
giant	1572	0.0509506
giant	1573	0.0815566
giant	1574	-0.000787482
giant	1575	0.0953658
giant	1576	0.015091
giant	1577	0.0126726
giant	1578	0.057298
giant	1579	0.00395572
giant	1580	0.0456173
giant	1581	0.00683277
giant	1582	-0.0195736
giant	1583	0.0354137
giant	1584	0.0998576
giant	1585	0.0676172
giant	1586	0.0226324
giant	1587	0.0806161
giant	1588	0.059972
giant	1589	0.00972663
giant	1590	0.0224371
giant	1591	0.0337315
giant	1592	0.0894529
giant	1593	0.0611879
giant	1594	0.0270939
giant	1595	0.0812986
giant	1596	0.0263815
giant	1597	0.000137965
giant	1598	0.0256429
giant	1599	0.0057137
giant	1600	0.0253966
giant	1601	-0.0290064
giant	1602	0.013733
giant	1603	-0.00635586
giant	1604	0.104042
giant	1605	0.0246997
giant	1606	0.0295821
giant	1607	0.0510293
giant	1608	-0.0264564
giant	1609	0.0535909
giant	1610	0.0319978
giant	1611	-0.0127447
giant	1612	0.0783001
giant	1613	-0.0126665
giant	1614	0.023477
giant	1615	-0.00204014
giant	1616	0.0224166
giant	1617	0.0463924
giant	1618	0.0368449
giant	1619	-0.0199364
giant	1620	0.0293899
giant	1621	0.0835399
giant	1622	-0.00157291
giant	1623	0.0481842
giant	1624	0.0684352
giant	1625	0.0426881
giant	1626	0.0093315
giant	1627	0.0505025
giant	1628	0.0229943
giant	1629	0.00296354
giant	1630	0.0613383
giant	1631	0.0377235
giant	1632	0.0105702
giant	1633	0.0764462
giant	1634	0.0583052
giant	1635	0.0185206
giant	1636	0.00879858
giant	1637	-0.00279289
giant	1638	0.0516742
giant	1639	0.0362849
giant	1640	0.000624507
giant	1641	0.105447
giant	1642	0.0845161
giant	1643	-0.0309479
giant	1644	-0.0176603
giant	1645	0.0942188
giant	1646	0.0658415
giant	1647	0.0091786
giant	1648	0.0703421
giant	1649	0.000141791
giant	1650	0.0331861
giant	1651	0.0356826
giant	1652	0.0040225
giant	1653	0.0273154
giant	1654	0.0456016
giant	1655	0.0236978
giant	1656	0.0357296
giant	1657	0.037991
giant	1658	-0.0571184
giant	1659	0.0388224
giant	1660	-0.0255923
giant	1661	0.00823996
giant	1662	-0.0111003
giant	1663	0.0466529
giant	1664	0.0185532
giant	1665	0.0454059
giant	1666	0.0235459
giant	1667	0.0273781
giant	1668	0.0146173
giant	1669	0.0275769
giant	1670	0.0274775
giant	1671	-0.0328069
giant	1672	0.0158602
giant	1673	0.00646645
giant	1674	0.0620391
giant	1675	-0.00297385
giant	1676	0.038088
giant	1677	0.00175746
giant	1678	0.0641926
giant	1679	0.02267
giant	1680	0.0360311
giant	1681	-0.00897589
giant	1682	-0.0283964
giant	1683	0.0199567
giant	1684	-0.0623315
giant	1685	0.0408035
giant	1686	0.0434827
giant	1687	0.00493934
giant	1688	0.0200147
giant	1689	0.0148234
giant	1690	0.0488706
giant	1691	0.0793833
giant	1692	0.0115039
giant	1693	-0.004683
giant	1694	0.0446812
giant	1695	-0.0165183
giant	1696	0.065124
giant	1697	-0.0415065
giant	1698	0.0650565
giant	1699	0.0524371
giant	1700	-0.00809322
giant	1701	-0.0698309
giant	1702	0.0105665
giant	1703	0.0317223
giant	1704	0.00413626
giant	1705	0.0304282
giant	1706	0.0921473
giant	1707	-0.0393805
giant	1708	-0.00993469
giant	1709	-0.0344627
giant	1710	0.00211913
giant	1711	-0.016905
giant	1712	0.0545233
giant	1713	-0.016056
giant	1714	0.022273
giant	1715	-0.00724074
giant	1716	0.00959526
giant	1717	-0.0125579
giant	1718	0.0129641
giant	1719	-0.00182582
giant	1720	0.0541581
giant	1721	-0.0460686
giant	1722	0.000549492
giant	1723	0.0387803
giant	1724	0.0340929
giant	1725	0.0183896
giant	1726	0.0241076
giant	1727	-0.00650981
giant	1728	0.0133588
giant	1729	-0.0353164
giant	1730	0.0175112
giant	1731	0.0588007
giant	1732	0.0123249
giant	1733	-0.00574247
giant	1734	0.0665715
giant	1735	0.0193204
giant	1736	-0.00973648
giant	1737	0.0188143
giant	1738	-0.0161766
giant	1739	-0.00343796
giant	1740	-0.0183782
giant	1741	0.00188186
giant	1742	-0.00508375
giant	1743	-0.00731521
giant	1744	0.081475
giant	1745	-0.00367809
giant	1746	0.000466353
giant	1747	-0.0154296
giant	1748	0.00824862
giant	1749	0.0205541
giant	1750	0.00657251
giant	1751	-0.00388326
giant	1752	0.0256814
giant	1753	-0.0595302
giant	1754	0.0261766
giant	1755	0.0132355
giant	1756	0.0189688
giant	1757	0.0042199
giant	1758	-0.0525703
giant	1759	-0.0142836
giant	1760	0.00884095
giant	1761	0.0185232
giant	1762	-0.0186672
giant	1763	0.0308815
giant	1764	0.0690604
giant	1765	0.0202999
giant	1766	-0.0278648
giant	1767	0.0307018
giant	1768	0.0145235
giant	1769	-0.0343281
giant	1770	0.0288362
giant	1771	-0.0321328
giant	1772	0.00941426
giant	1773	-0.0500356
giant	1774	0.0143774
giant	1775	-0.00423805
giant	1776	0.00155882
giant	1777	-0.0277234
giant	1778	0.00718587
giant	1779	0.00120949
giant	1780	0.00748641
giant	1781	0.00358789
giant	1782	0.00963986
giant	1783	-0.0380972
giant	1784	0.0115074
giant	1785	-0.0649644
giant	1786	0.0147679
giant	1787	0.00478772
giant	1788	0.0275171
giant	1789	-0.0137872
giant	1790	0.016022
giant	1791	0.0245209
giant	1792	0.0361686
giant	1793	0.0623011
giant	1794	0.0123997
giant	1795	-0.0360187
giant	1796	0.018676
giant	1797	0.0174256
giant	1798	-0.0356273
giant	1799	0.0435651
giant	1800	0.00131264
giant	1801	0.0105716
giant	1802	-0.00319353
giant	1803	-0.0044062
giant	1804	-0.0288338
giant	1805	-0.0111898
giant	1806	-0.020844
giant	1807	0.0314962
giant	1808	-0.0381965
giant	1809	0.0420945
giant	1810	0.029672
giant	1811	0.0356953
giant	1812	-0.0284039
giant	1813	-0.00915073
giant	1814	-0.00942051
giant	1815	-0.0174803
giant	1816	0.0291613
giant	1817	-0.0452864
giant	1818	0.0622184
giant	1819	0.00756655
giant	1820	0.0268517
giant	1821	-0.0248223
giant	1822	0.0376419
giant	1823	-0.0322869
giant	1824	-0.0129776
giant	1825	-0.00905063
giant	1826	-0.0596558
giant	1827	-0.0432905
giant	1828	-0.0210294
giant	1829	0.101642
giant	1830	-0.0233371
giant	1831	0.039218
giant	1832	-0.0332996
giant	1833	0.00382964
giant	1834	0.0174894
giant	1835	0.00317462
giant	1836	0.048022
giant	1837	-0.00950096
giant	1838	0.00369734
giant	1839	-0.0346989
giant	1840	-0.0284885
giant	1841	0.0252344
giant	1842	-0.0456251
giant	1843	-0.0182588
giant	1844	-0.0401306
giant	1845	-0.0418699
giant	1846	-0.03137
giant	1847	0.0221189
giant	1848	0.00463674
giant	1849	0.070182
giant	1850	0.0290114
giant	1851	-0.0354435
giant	1852	-0.0449988
giant	1853	-0.00662636
giant	1854	-0.0198273
giant	1855	-0.0831712
giant	1856	-0.0153466
giant	1857	-0.0320915
giant	1858	-0.0563984
ukb_neale1	1	0.603365
ukb_neale1	2	0.406244
ukb_neale1	3	0.499879
ukb_neale1	4	0.361666
ukb_neale1	5	0.0973601
ukb_neale1	6	0.556922
ukb_neale1	7	0.376876
ukb_neale1	8	0.317231
ukb_neale1	9	0.571844
ukb_neale1	10	0.310261
ukb_neale1	11	0.00468951
ukb_neale1	12	0.130415
ukb_neale1	13	0.180433
ukb_neale1	14	0.19435
ukb_neale1	15	0.151631
ukb_neale1	16	0.116735
ukb_neale1	17	0.429009
ukb_neale1	18	0.127432
ukb_neale1	19	0.148898
ukb_neale1	20	-0.0218382
ukb_neale1	21	0.292607
ukb_neale1	22	0.141827
ukb_neale1	23	0.301509
ukb_neale1	24	0.0118656
ukb_neale1	25	-0.0448969
ukb_neale1	26	-0.218681
ukb_neale1	27	0.257923
ukb_neale1	28	0.0985194
ukb_neale1	29	0.0287062
ukb_neale1	30	0.096824
ukb_neale1	31	0.380207
ukb_neale1	32	0.246179
ukb_neale1	33	0.107309
ukb_neale1	34	-0.0429822
ukb_neale1	35	-0.0846308
ukb_neale1	36	0.200489
ukb_neale1	37	0.231857
ukb_neale1	38	0.220111
ukb_neale1	39	0.186667
ukb_neale1	40	0.0741531
ukb_neale1	41	0.157592
ukb_neale1	42	0.006016
ukb_neale1	43	0.072287
ukb_neale1	44	0.0128806
ukb_neale1	45	-0.0416692
ukb_neale1	46	0.11555
ukb_neale1	47	0.216051
ukb_neale1	48	0.123133
ukb_neale1	49	0.0500655
ukb_neale1	50	0.151305
ukb_neale1	51	0.123346
ukb_neale1	52	0.137242
ukb_neale1	53	0.10502
ukb_neale1	54	0.242192
ukb_neale1	55	0.137622
ukb_neale1	56	0.0330646
ukb_neale1	57	0.134775
ukb_neale1	58	0.214118
ukb_neale1	59	0.369657
ukb_neale1	60	0.30248
ukb_neale1	61	0.30342
ukb_neale1	62	0.0860861
ukb_neale1	63	0.154339
ukb_neale1	64	0.235264
ukb_neale1	65	0.287803
ukb_neale1	66	0.243328
ukb_neale1	67	0.172238
ukb_neale1	68	0.141637
ukb_neale1	69	0.253827
ukb_neale1	70	0.218085
ukb_neale1	71	0.128157
ukb_neale1	72	0.105535
ukb_neale1	73	-0.0318626
ukb_neale1	74	-0.0479302
ukb_neale1	75	-0.0646309
ukb_neale1	76	-0.0340018
ukb_neale1	77	-0.0670445
ukb_neale1	78	0.0957893
ukb_neale1	79	-0.00754742
ukb_neale1	80	0.0303113
ukb_neale1	81	0.0873296
ukb_neale1	82	0.0709406
ukb_neale1	83	0.111951
ukb_neale1	84	0.106136
ukb_neale1	85	0.125503
ukb_neale1	86	0.0285653
ukb_neale1	87	-0.00767982
ukb_neale1	88	-0.0016326
ukb_neale1	89	-0.133234
ukb_neale1	90	0.183877
ukb_neale1	91	-0.016494
ukb_neale1	92	0.138877
ukb_neale1	93	0.0554343
ukb_neale1	94	0.0429163
ukb_neale1	95	0.11153
ukb_neale1	96	0.0125613
ukb_neale1	97	0.0465777
ukb_neale1	98	0.0441779
ukb_neale1	99	-0.00148765
ukb_neale1	100	-0.0196955
ukb_neale1	101	-0.0649518
ukb_neale1	102	-0.0343082
ukb_neale1	103	0.14743
ukb_neale1	104	-0.0305894
ukb_neale1	105	0.0189679
ukb_neale1	106	0.154883
ukb_neale1	107	0.20944
ukb_neale1	108	0.125642
ukb_neale1	109	0.131724
ukb_neale1	110	0.0798985
ukb_neale1	111	0.0273449
ukb_neale1	112	0.236343
ukb_neale1	113	0.185397
ukb_neale1	114	-0.0487382
ukb_neale1	115	0.123308
ukb_neale1	116	0.181333
ukb_neale1	117	0.343784
ukb_neale1	118	0.258902
ukb_neale1	119	0.106295
ukb_neale1	120	0.0998393
ukb_neale1	121	0.0425652
ukb_neale1	122	0.188387
ukb_neale1	123	0.185213
ukb_neale1	124	0.233497
ukb_neale1	125	0.286724
ukb_neale1	126	0.356679
ukb_neale1	127	0.109747
ukb_neale1	128	0.0626492
ukb_neale1	129	0.00630669
ukb_neale1	130	0.0274538
ukb_neale1	131	0.0790567
ukb_neale1	132	-0.015464
ukb_neale1	133	0.051114
ukb_neale1	134	0.113852
ukb_neale1	135	-0.0593911
ukb_neale1	136	0.0168392
ukb_neale1	137	-0.0653665
ukb_neale1	138	0.0495007
ukb_neale1	139	0.0386669
ukb_neale1	140	0.121794
ukb_neale1	141	0.0630767
[truncated: 4,192 more rows]

## Sheet: name map
Name in Supplementary File 1	Name in source data
GIANT	giant
UKB Neale (UKB)	ukb_neale1
UKB Neale new	ukb_neale2
UKB Loh	ukb_loh
UKB all no PCs	ukbsparse_all_nopcs
UKB all 10 PCs	ukbsparse_all_10pcs
UKB WB no PCs	ukbsparse_wb_nopcs
UKB WB 10 PCs	ukbsparse_wb_10pcs
NG2015 sibs	famest
UKB sibs all	ukbfam_all
UKB sibs WB	ukbfam_wb
