# Supplementary material for: Polygenic adaptation on height is overestimated due to uncorrected stratification in genome-wide association studies
Source: eLife. 2019 Mar 21;8:e39702. doi: 10.7554/eLife.39702 (PMC6428571; doi:10.7554/eLife.39702)
Supplement: Figure 2—source data 1. [file elife-39702-fig2-data1.xlsx]

## Sheet: Figures 2a and 2b
name	PC	corr	corrse	numsnps	gbrtsicorr	pvalue
giant	1	0.0211348	0.00577731	819746	0.0903215	0.000253957
giant	2	-0.0819847	0.00622134	819746	-0.0301727	1.17486e-39
giant	3	0.0246546	0.00522706	819746	-0.00538738	2.39684e-06
giant	4	0.0425115	0.00694264	819746	0.419353	9.16861e-10
giant	5	-0.011996	0.00327086	819746	-0.0285841	0.000244905
giant	6	-0.0160963	0.00488596	819746	-0.0500684	0.000986337
giant	7	0.00999084	0.00543335	819746	0.0190127	0.0659448
giant	8	-0.0158271	0.00564741	819746	-0.0986152	0.00507005
giant	9	0.0219516	0.00506011	819746	0.191341	1.43681e-05
giant	10	-0.00388341	0.00423383	819746	-0.0428135	0.359021
giant	11	0.0900309	0.00614097	819746	0.595273	1.15054e-48
giant	12	0.00942178	0.00350346	819746	0.09381	0.0071607
giant	13	-0.00487275	0.0036791	819746	-0.00497155	0.185356
giant	14	0.0105292	0.00433643	819746	0.0562198	0.015179
giant	15	0.00961687	0.00442455	819746	0.0171733	0.0297409
giant	16	-0.0056165	0.00361227	819746	0.0316247	0.119984
giant	17	0.00291807	0.00466218	819746	0.162082	0.53138
giant	18	0.0111703	0.00554569	819746	0.187231	0.0439844
giant	19	0.000826805	0.00428637	819746	-0.101314	0.847044
giant	20	-0.00826198	0.00506444	819746	0.111078	0.102812
ukb_neale1	1	-0.0011172	0.00623552	819793	0.0903186	0.857807
ukb_neale1	2	-0.00227511	0.00608791	819793	-0.0301779	0.70862
ukb_neale1	3	0.00221995	0.00501571	819793	-0.00538016	0.658055
ukb_neale1	4	0.000420697	0.00698305	819793	0.419348	0.95196
ukb_neale1	5	-0.00192543	0.00352666	819793	-0.0285828	0.58509
ukb_neale1	6	-0.000551959	0.00511612	819793	-0.0500674	0.914086
ukb_neale1	7	0.00069609	0.00529512	819793	0.0190191	0.895412
ukb_neale1	8	0.00486455	0.00587901	819793	-0.098611	0.407985
ukb_neale1	9	-0.00743681	0.00531012	819793	0.191336	0.161364
ukb_neale1	10	0.00290038	0.00436504	819793	-0.0428288	0.506398
ukb_neale1	11	-0.00660309	0.00601993	819793	0.595265	0.272698
ukb_neale1	12	-0.00676969	0.00459775	819793	0.0938134	0.140915
ukb_neale1	13	-0.00484634	0.00380867	819793	-0.00498301	0.203213
ukb_neale1	14	0.00417238	0.0047972	819793	0.0562335	0.384435
ukb_neale1	15	0.0053574	0.0044273	819793	0.01717	0.226247
ukb_neale1	16	-0.00798116	0.00409257	819793	0.0316307	0.051157
ukb_neale1	17	-0.000711403	0.00531417	819793	0.162078	0.893506
ukb_neale1	18	0.00143826	0.00624925	819793	0.187231	0.817976
ukb_neale1	19	-0.000514163	0.00436689	819793	-0.1013	0.906273
ukb_neale1	20	-0.0061558	0.00538736	819793	0.111073	0.253189
SDS	1	0.0951256	0.00458583	819793	0.0903186	1.4065e-95
SDS	2	-0.068608	0.00496037	819793	-0.0301779	1.65205e-43
SDS	3	0.0147823	0.00470427	819793	-0.00538016	0.00167613
SDS	4	0.260589	0.00527006	819793	0.419348	0
SDS	5	-0.0114231	0.00280218	819793	-0.0285828	4.57158e-05
SDS	6	-0.0321955	0.00397532	819793	-0.0500674	5.5483e-16
SDS	7	0.00905286	0.00453597	819793	0.0190191	0.0459565
SDS	8	-0.0492398	0.00521879	819793	-0.098611	3.90634e-21
SDS	9	0.065284	0.00375059	819793	0.191336	7.38608e-68
SDS	10	-0.0106358	0.0032805	819793	-0.0428288	0.00118637
SDS	11	0.216426	0.00529972	819793	0.595265	0
SDS	12	0.0335816	0.003286	819793	0.0938134	1.62026e-24
SDS	13	-0.00438425	0.00291145	819793	-0.00498301	0.132102
SDS	14	0.0244505	0.00492716	819793	0.0562335	6.96327e-07
SDS	15	0.0060825	0.00414695	819793	0.01717	0.142446
SDS	16	-0.000417912	0.00365656	819793	0.0316307	0.909007
SDS	17	0.00359568	0.00428811	819793	0.162078	0.401737
SDS	18	0.0111635	0.00479271	819793	0.187231	0.0198451
SDS	19	-0.0076536	0.00344008	819793	-0.1013	0.0260925
SDS	20	-0.0169944	0.00510222	819793	0.111073	0.000866035

## Sheet: Figures 2c and 2d
name	gbrbin	tsibin	numsnps	meanbeta	meanbetascaled	gbrbinmean	tsibinmean
giant	[0,0.0459]	[0,0.0459]	35868	-0.00274032	-0.333703	0.02	0.02
giant	[0,0.0459]	(0.0459,0.0618]	11979	-0.00186416	-0.213056	0.02	0.05
giant	[0,0.0459]	(0.0618,0.0765]	15842	-0.00213371	-0.250172	0.02	0.07
giant	[0,0.0459]	(0.0765,0.0899]	7571	-0.00263323	-0.318957	0.02	0.08
giant	[0,0.0459]	(0.0899,0.101]	5212	-0.00312473	-0.386636	0.02	0.1
giant	[0,0.0459]	(0.101,0.112]	4124	-0.00140713	-0.150122	0.02	0.11
giant	[0,0.0459]	(0.112,0.129]	1736	-0.00158917	-0.17519	0.02	0.12
giant	[0,0.0459]	(0.129,0.143]	729	-0.00211139	-0.247099	0.02	0.14
giant	[0,0.0459]	(0.143,0.157]	253	-0.00194783	-0.224576	0.02	0.15
giant	[0,0.0459]	(0.157,0.169]	146	-0.00432603	-0.552055	0.02	0.16
giant	[0,0.0459]	(0.169,0.185]	49	-0.000730612	-0.056966	0.02	0.18
giant	[0,0.0459]	(0.185,0.202]	28	-0.00992857	-1.32353	0.02	0.19
giant	[0,0.0459]	(0.202,0.219]	54	-0.00350185	-0.438566	0.02	0.21
giant	[0,0.0459]	(0.219,0.23]	10	-0.02112	-2.86459	0.02	0.22
giant	(0.0459,0.0618]	[0,0.0459]	11068	-0.000764691	-0.0616587	0.05	0.02
giant	(0.0459,0.0618]	(0.0459,0.0618]	21517	-0.00112757	-0.111627	0.05	0.05
giant	(0.0459,0.0618]	(0.0618,0.0765]	18721	-0.00125855	-0.129663	0.05	0.07
giant	(0.0459,0.0618]	(0.0765,0.0899]	9152	-0.00137796	-0.146106	0.05	0.08
giant	(0.0459,0.0618]	(0.0899,0.101]	7070	-0.00137547	-0.145764	0.05	0.1
giant	(0.0459,0.0618]	(0.101,0.112]	7258	-0.00178275	-0.201846	0.05	0.11
giant	(0.0459,0.0618]	(0.112,0.129]	3876	-0.00216001	-0.253794	0.05	0.12
giant	(0.0459,0.0618]	(0.129,0.143]	2212	-0.00214168	-0.25127	0.05	0.14
giant	(0.0459,0.0618]	(0.143,0.157]	859	-0.00319686	-0.396568	0.05	0.15
giant	(0.0459,0.0618]	(0.157,0.169]	520	-0.00309	-0.381854	0.05	0.16
giant	(0.0459,0.0618]	(0.169,0.185]	285	-0.00380772	-0.480684	0.05	0.18
giant	(0.0459,0.0618]	(0.185,0.202]	120	-0.00179083	-0.202959	0.05	0.19
giant	(0.0459,0.0618]	(0.202,0.219]	34	-0.00233529	-0.277931	0.05	0.21
giant	(0.0459,0.0618]	(0.219,0.23]	25	-0.012104	-1.62308	0.05	0.22
giant	(0.0459,0.0618]	(0.23,0.25]	14	-0.0105714	-1.41205	0.05	0.24
giant	(0.0459,0.0618]	(0.25,0.265]	1	-0.0052	-0.672401	0.05	0.26
giant	(0.0459,0.0618]	(0.281,0.298]	2	-0.025	-3.39886	0.05	0.29
giant	(0.0459,0.0618]	(0.298,0.316]	1	-0.025	-3.39886	0.05	0.31
giant	(0.0618,0.0765]	[0,0.0459]	10396	-2.12101e-05	0.0407187	0.07	0.02
giant	(0.0618,0.0765]	(0.0459,0.0618]	12245	-0.00103931	-0.0994732	0.07	0.05
giant	(0.0618,0.0765]	(0.0618,0.0765]	12767	-0.000745633	-0.0590344	0.07	0.07
giant	(0.0618,0.0765]	(0.0765,0.0899]	7286	-0.000926077	-0.0838816	0.07	0.08
giant	(0.0618,0.0765]	(0.0899,0.101]	6347	-0.00147131	-0.15896	0.07	0.1
giant	(0.0618,0.0765]	(0.101,0.112]	6884	-0.000920105	-0.0830591	0.07	0.11
giant	(0.0618,0.0765]	(0.112,0.129]	4406	-0.00141714	-0.1515	0.07	0.12
giant	(0.0618,0.0765]	(0.129,0.143]	2721	-0.000960382	-0.0886054	0.07	0.14
giant	(0.0618,0.0765]	(0.143,0.157]	1137	-0.00169499	-0.18976	0.07	0.15
giant	(0.0618,0.0765]	(0.157,0.169]	786	-0.00224987	-0.266168	0.07	0.16
giant	(0.0618,0.0765]	(0.169,0.185]	489	-0.00129141	-0.134188	0.07	0.18
giant	(0.0618,0.0765]	(0.185,0.202]	253	-0.00201423	-0.23372	0.07	0.19
giant	(0.0618,0.0765]	(0.202,0.219]	119	-0.00710924	-0.935304	0.07	0.21
giant	(0.0618,0.0765]	(0.219,0.23]	24	0.000795833	0.153226	0.07	0.22
giant	(0.0618,0.0765]	(0.23,0.25]	7	0.00207143	0.328875	0.07	0.24
giant	(0.0618,0.0765]	(0.25,0.265]	6	-0.00588333	-0.766496	0.07	0.26
giant	(0.0618,0.0765]	(0.265,0.281]	4	-0.0155	-2.09071	0.07	0.27
giant	(0.0765,0.0899]	[0,0.0459]	10573	0.000657704	0.134205	0.08	0.02
giant	(0.0765,0.0899]	(0.0459,0.0618]	12204	-0.000236914	0.0110163	0.08	0.05
giant	(0.0765,0.0899]	(0.0618,0.0765]	15755	-0.000355595	-0.0053261	0.08	0.07
giant	(0.0765,0.0899]	(0.0765,0.0899]	10492	-0.000925696	-0.083829	0.08	0.08
giant	(0.0765,0.0899]	(0.0899,0.101]	9457	-0.00112804	-0.111692	0.08	0.1
giant	(0.0765,0.0899]	(0.101,0.112]	12112	-0.00129119	-0.134158	0.08	0.11
giant	(0.0765,0.0899]	(0.112,0.129]	9273	-0.00106232	-0.102642	0.08	0.12
giant	(0.0765,0.0899]	(0.129,0.143]	6110	-0.00172753	-0.194242	0.08	0.14
giant	(0.0765,0.0899]	(0.143,0.157]	3126	-0.00208375	-0.243293	0.08	0.15
giant	(0.0765,0.0899]	(0.157,0.169]	2779	-0.00248647	-0.298748	0.08	0.16
giant	(0.0765,0.0899]	(0.169,0.185]	1526	-0.00229443	-0.272304	0.08	0.18
giant	(0.0765,0.0899]	(0.185,0.202]	686	-0.00173761	-0.19563	0.08	0.19
giant	(0.0765,0.0899]	(0.202,0.219]	449	-0.00443586	-0.567179	0.08	0.21
giant	(0.0765,0.0899]	(0.219,0.23]	185	-0.00235459	-0.280589	0.08	0.22
giant	(0.0765,0.0899]	(0.23,0.25]	49	-0.00327551	-0.407399	0.08	0.24
giant	(0.0765,0.0899]	(0.25,0.265]	5	-0.0062	-0.810101	0.08	0.26
giant	(0.0765,0.0899]	(0.265,0.281]	32	-0.0244313	-3.32055	0.08	0.27
giant	(0.0765,0.0899]	(0.281,0.298]	9	0.00337778	0.50876	0.08	0.29
giant	(0.0765,0.0899]	(0.298,0.316]	4	-0.0071	-0.934031	0.08	0.31
giant	(0.0899,0.101]	[0,0.0459]	4650	0.00049	0.111112	0.1	0.02
giant	(0.0899,0.101]	(0.0459,0.0618]	5813	2.20368e-05	0.0466739	0.1	0.05
giant	(0.0899,0.101]	(0.0618,0.0765]	9228	0.000375401	0.0953321	0.1	0.07
giant	(0.0899,0.101]	(0.0765,0.0899]	6839	-0.000241687	0.010359	0.1	0.08
giant	(0.0899,0.101]	(0.0899,0.101]	7417	-0.0007669	-0.0619629	0.1	0.1
giant	(0.0899,0.101]	(0.101,0.112]	10880	-0.000665616	-0.048016	0.1	0.11
giant	(0.0899,0.101]	(0.112,0.129]	9194	-0.00116254	-0.116443	0.1	0.12
giant	(0.0899,0.101]	(0.129,0.143]	6591	-0.00124649	-0.128002	0.1	0.14
giant	(0.0899,0.101]	(0.143,0.157]	3854	-0.00175843	-0.198497	0.1	0.15
giant	(0.0899,0.101]	(0.157,0.169]	3712	-0.00148505	-0.160852	0.1	0.16
giant	(0.0899,0.101]	(0.169,0.185]	2299	-0.00263249	-0.318855	0.1	0.18
giant	(0.0899,0.101]	(0.185,0.202]	1352	-0.00128676	-0.133548	0.1	0.19
giant	(0.0899,0.101]	(0.202,0.219]	701	-0.00231897	-0.275683	0.1	0.21
giant	(0.0899,0.101]	(0.219,0.23]	306	-0.00258039	-0.311681	0.1	0.22
giant	(0.0899,0.101]	(0.23,0.25]	233	-0.00235322	-0.280399	0.1	0.24
giant	(0.0899,0.101]	(0.25,0.265]	68	-0.000173529	0.0197444	0.1	0.26
giant	(0.0899,0.101]	(0.265,0.281]	92	-0.0122576	-1.64423	0.1	0.27
giant	(0.0899,0.101]	(0.281,0.298]	24	0.00178333	0.289205	0.1	0.29
giant	(0.0899,0.101]	(0.298,0.316]	15	-0.0011	-0.107831	0.1	0.31
giant	(0.0899,0.101]	(0.352,0.371]	4	-0.0021	-0.245531	0.1	0.36
giant	(0.0899,0.101]	(0.371,0.388]	2	0.00305	0.463625	0.1	0.38
giant	(0.101,0.112]	[0,0.0459]	2332	0.000152873	0.06469	0.11	0.02
giant	(0.101,0.112]	(0.0459,0.0618]	3663	0.000233716	0.075822	0.11	0.05
giant	(0.101,0.112]	(0.0618,0.0765]	6259	0.000618501	0.128807	0.11	0.07
giant	(0.101,0.112]	(0.0765,0.0899]	5086	0.000538242	0.117755	0.11	0.08
giant	(0.101,0.112]	(0.0899,0.101]	5925	1.12743e-05	0.0451918	0.11	0.1
giant	(0.101,0.112]	(0.101,0.112]	9576	-0.00044315	-0.0173824	0.11	0.11
giant	(0.101,0.112]	(0.112,0.129]	8668	-0.000224481	0.0127283	0.11	0.12
giant	(0.101,0.112]	(0.129,0.143]	6777	-0.000939678	-0.0857544	0.11	0.14
giant	(0.101,0.112]	(0.143,0.157]	4303	-0.000945108	-0.0865021	0.11	0.15
giant	(0.101,0.112]	(0.157,0.169]	4205	-0.00113446	-0.112576	0.11	0.16
giant	(0.101,0.112]	(0.169,0.185]	3023	-0.00199606	-0.231219	0.11	0.18
giant	(0.101,0.112]	(0.185,0.202]	1729	-0.00191758	-0.220412	0.11	0.19
giant	(0.101,0.112]	(0.202,0.219]	1051	-0.000747003	-0.059223	0.11	0.21
giant	(0.101,0.112]	(0.219,0.23]	604	-0.000734272	-0.0574699	0.11	0.22
giant	(0.101,0.112]	(0.23,0.25]	321	-0.00173894	-0.195813	0.11	0.24
giant	(0.101,0.112]	(0.25,0.265]	121	-0.00178926	-0.202741	0.11	0.26
giant	(0.101,0.112]	(0.265,0.281]	45	-0.00161111	-0.178211	0.11	0.27
giant	(0.101,0.112]	(0.281,0.298]	26	0.0042	0.62198	0.11	0.29
giant	(0.101,0.112]	(0.298,0.316]	5	-0.00094	-0.0857987	0.11	0.31
giant	(0.101,0.112]	(0.316,0.337]	2	0.0055	0.80099	0.11	0.33
giant	(0.101,0.112]	(0.337,0.352]	1	-0.0085	-1.12681	0.11	0.34
giant	(0.101,0.112]	(0.352,0.371]	1	0.0025	0.38789	0.11	0.36
giant	(0.112,0.129]	[0,0.0459]	1423	0.001987	0.317249	0.12	0.02
giant	(0.112,0.129]	(0.0459,0.0618]	2708	0.000238996	0.0765491	0.12	0.05
giant	(0.112,0.129]	(0.0618,0.0765]	4890	0.000280307	0.0822377	0.12	0.07
giant	(0.112,0.129]	(0.0765,0.0899]	4615	0.000622319	0.129333	0.12	0.08
giant	(0.112,0.129]	(0.0899,0.101]	5658	0.000331442	0.089279	0.12	0.1
giant	(0.112,0.129]	(0.101,0.112]	9155	0.000194003	0.0703537	0.12	0.11
giant	(0.112,0.129]	(0.112,0.129]	9685	-0.000748518	-0.0594317	0.12	0.12
giant	(0.112,0.129]	(0.129,0.143]	7880	-0.00107353	-0.104186	0.12	0.14
giant	(0.112,0.129]	(0.143,0.157]	6143	-0.0011181	-0.110323	0.12	0.15
giant	(0.112,0.129]	(0.157,0.169]	6440	-0.00124815	-0.128231	0.12	0.16
giant	(0.112,0.129]	(0.169,0.185]	4225	-0.00137941	-0.146305	0.12	0.18
giant	(0.112,0.129]	(0.185,0.202]	2831	-0.00169954	-0.190388	0.12	0.19
giant	(0.112,0.129]	(0.202,0.219]	1728	-0.00149896	-0.162767	0.12	0.21
giant	(0.112,0.129]	(0.219,0.23]	1000	-0.0013703	-0.145051	0.12	0.22
giant	(0.112,0.129]	(0.23,0.25]	700	-0.00119729	-0.121227	0.12	0.24
giant	(0.112,0.129]	(0.25,0.265]	217	-0.00231751	-0.275482	0.12	0.26
giant	(0.112,0.129]	(0.265,0.281]	116	-0.00194569	-0.224282	0.12	0.27
giant	(0.112,0.129]	(0.281,0.298]	47	-0.00285745	-0.349831	0.12	0.29
giant	(0.112,0.129]	(0.298,0.316]	21	-0.00306667	-0.378641	0.12	0.31
giant	(0.112,0.129]	(0.316,0.337]	8	-0.00155	-0.169796	0.12	0.33
giant	(0.112,0.129]	(0.337,0.352]	9	-0.0173222	-2.34163	0.12	0.34
giant	(0.112,0.129]	(0.352,0.371]	5	-0.00768	-1.0139	0.12	0.36
giant	(0.112,0.129]	(0.371,0.388]	2	-0.003	-0.369461	0.12	0.38
giant	(0.112,0.129]	(0.388,0.408]	4	-0.006725	-0.882394	0.12	0.4
giant	(0.129,0.143]	[0,0.0459]	805	0.00231565	0.362505	0.14	0.02
giant	(0.129,0.143]	(0.0459,0.0618]	2004	0.000691118	0.138806	0.14	0.05
giant	(0.129,0.143]	(0.0618,0.0765]	4077	0.00189711	0.304871	0.14	0.07
giant	(0.129,0.143]	(0.0765,0.0899]	4453	0.00186908	0.301012	0.14	0.08
giant	(0.129,0.143]	(0.0899,0.101]	5576	0.000380506	0.0960351	0.14	0.1
giant	(0.129,0.143]	(0.101,0.112]	9906	0.000378155	0.0957113	0.14	0.11
giant	(0.129,0.143]	(0.112,0.129]	10757	7.97248e-05	0.0546175	0.14	0.12
giant	(0.129,0.143]	(0.129,0.143]	10721	-0.000880002	-0.077537	0.14	0.14
giant	(0.129,0.143]	(0.143,0.157]	7675	-0.000529694	-0.0292995	0.14	0.15
giant	(0.129,0.143]	(0.157,0.169]	9254	-0.000769754	-0.0623558	0.14	0.16
giant	(0.129,0.143]	(0.169,0.185]	6926	-0.00110901	-0.109071	0.14	0.18
giant	(0.129,0.143]	(0.185,0.202]	5254	-0.000753426	-0.0601075	0.14	0.19
giant	(0.129,0.143]	(0.202,0.219]	3634	-0.000754128	-0.0602041	0.14	0.21
giant	(0.129,0.143]	(0.219,0.23]	2360	-0.00210534	-0.246266	0.14	0.22
giant	(0.129,0.143]	(0.23,0.25]	1900	-7.76842e-05	0.0329423	0.14	0.24
giant	(0.129,0.143]	(0.25,0.265]	656	-1.21951e-06	0.0434715	0.14	0.26
giant	(0.129,0.143]	(0.265,0.281]	499	-0.000639679	-0.0444445	0.14	0.27
giant	(0.129,0.143]	(0.281,0.298]	184	-0.00154239	-0.168748	0.14	0.29
giant	(0.129,0.143]	(0.298,0.316]	105	-0.00215238	-0.252744	0.14	0.31
giant	(0.129,0.143]	(0.316,0.337]	54	-0.00226852	-0.268736	0.14	0.33
giant	(0.129,0.143]	(0.337,0.352]	43	-0.0229326	-3.11418	0.14	0.34
giant	(0.129,0.143]	(0.352,0.371]	1	0.018	2.52224	0.14	0.36
giant	(0.129,0.143]	(0.371,0.388]	13	-0.0029	-0.355691	0.14	0.38
giant	(0.129,0.143]	(0.388,0.408]	9	-0.00964444	-1.2844	0.14	0.4
giant	(0.129,0.143]	(0.408,0.427]	1	-0.011	-1.47106	0.14	0.42
giant	(0.143,0.157]	[0,0.0459]	228	0.00163246	0.268429	0.15	0.02
giant	(0.143,0.157]	(0.0459,0.0618]	1122	0.000151693	0.0645276	0.15	0.05
giant	(0.143,0.157]	(0.0618,0.0765]	2233	0.000918585	0.170129	0.15	0.07
giant	(0.143,0.157]	(0.0765,0.0899]	2563	0.00073016	0.144182	0.15	0.08
giant	(0.143,0.157]	(0.0899,0.101]	3931	0.00079766	0.153477	0.15	0.1
giant	(0.143,0.157]	(0.101,0.112]	7637	0.000575082	0.122828	0.15	0.11
giant	(0.143,0.157]	(0.112,0.129]	9636	0.000387412	0.096986	0.15	0.12
giant	(0.143,0.157]	(0.129,0.143]	9843	-0.000229615	0.0120214	0.15	0.14
giant	(0.143,0.157]	(0.143,0.157]	8270	-0.000700677	-0.0528439	0.15	0.15
giant	(0.143,0.157]	(0.157,0.169]	10432	-0.000783752	-0.0642834	0.15	0.16
giant	(0.143,0.157]	(0.169,0.185]	9168	-0.00096959	-0.0898733	0.15	0.18
giant	(0.143,0.157]	(0.185,0.202]	7756	-0.000847421	-0.0730506	0.15	0.19
giant	(0.143,0.157]	(0.202,0.219]	5799	-0.000919848	-0.0830238	0.15	0.21
giant	(0.143,0.157]	(0.219,0.23]	4248	-0.00130807	-0.136483	0.15	0.22
giant	(0.143,0.157]	(0.23,0.25]	3387	-0.000972247	-0.0902391	0.15	0.24
giant	(0.143,0.157]	(0.25,0.265]	1621	-0.000948489	-0.0869676	0.15	0.26
giant	(0.143,0.157]	(0.265,0.281]	799	-0.00257284	-0.310641	0.15	0.27
giant	(0.143,0.157]	(0.281,0.298]	521	-0.00125854	-0.129662	0.15	0.29
giant	(0.143,0.157]	(0.298,0.316]	205	-0.00251902	-0.303231	0.15	0.31
giant	(0.143,0.157]	(0.316,0.337]	100	-0.000707	-0.0537146	0.15	0.33
giant	(0.143,0.157]	(0.337,0.352]	28	-0.00225357	-0.266678	0.15	0.34
giant	(0.143,0.157]	(0.352,0.371]	20	-0.008155	-1.07931	0.15	0.36
giant	(0.143,0.157]	(0.371,0.388]	15	0.00118667	0.207044	0.15	0.38
giant	(0.143,0.157]	(0.388,0.408]	16	-0.00424375	-0.540725	0.15	0.4
giant	(0.143,0.157]	(0.408,0.427]	30	-0.00992333	-1.3228	0.15	0.42
giant	(0.143,0.157]	(0.427,0.444]	13	-0.0116154	-1.5558	0.15	0.44
giant	(0.143,0.157]	(0.444,0.464]	5	-0.0116	-1.55368	0.15	0.45
giant	(0.157,0.169]	[0,0.0459]	85	0.00354941	0.532394	0.16	0.02
giant	(0.157,0.169]	(0.0459,0.0618]	415	0.00199494	0.318343	0.16	0.05
giant	(0.157,0.169]	(0.0618,0.0765]	802	0.00106322	0.190044	0.16	0.07
giant	(0.157,0.169]	(0.0765,0.0899]	1095	0.00158941	0.262501	0.16	0.08
giant	(0.157,0.169]	(0.0899,0.101]	1695	0.000834867	0.158601	0.16	0.1
giant	(0.157,0.169]	(0.101,0.112]	3537	0.000926209	0.171178	0.16	0.11
giant	(0.157,0.169]	(0.112,0.129]	4884	0.000362162	0.0935092	0.16	0.12
giant	(0.157,0.169]	(0.129,0.143]	5597	-0.000177559	0.0191894	0.16	0.14
giant	(0.157,0.169]	(0.143,0.157]	5276	-0.000332676	-0.00217018	0.16	0.15
giant	(0.157,0.169]	(0.157,0.169]	7317	-0.000665259	-0.0479669	0.16	0.16
giant	(0.157,0.169]	(0.169,0.185]	6755	-0.000663005	-0.0476565	0.16	0.18
giant	(0.157,0.169]	(0.185,0.202]	6261	-0.000759895	-0.0609982	0.16	0.19
giant	(0.157,0.169]	(0.202,0.219]	4705	-0.000569756	-0.034816	0.16	0.21
giant	(0.157,0.169]	(0.219,0.23]	3770	-0.00113103	-0.112104	0.16	0.22
giant	(0.157,0.169]	(0.23,0.25]	3325	-0.00103808	-0.0993037	0.16	0.24
giant	(0.157,0.169]	(0.25,0.265]	1533	-0.00103516	-0.0989022	0.16	0.26
giant	(0.157,0.169]	(0.265,0.281]	896	-0.00178025	-0.201501	0.16	0.27
giant	(0.157,0.169]	(0.281,0.298]	669	-0.00157877	-0.173758	0.16	0.29
giant	(0.157,0.169]	(0.298,0.316]	444	0.00039482	0.0980061	0.16	0.31
giant	(0.157,0.169]	(0.316,0.337]	161	-0.0034354	-0.429416	0.16	0.33
giant	(0.157,0.169]	(0.337,0.352]	58	-0.000565517	-0.0342324	0.16	0.34
giant	(0.157,0.169]	(0.352,0.371]	30	-0.000833333	-0.0711107	0.16	0.36
giant	(0.157,0.169]	(0.371,0.388]	10	-0.00167	-0.18632	0.16	0.38
giant	(0.157,0.169]	(0.388,0.408]	6	0.00728333	1.04656	0.16	0.4
giant	(0.157,0.169]	(0.408,0.427]	1	-0.0086	-1.14058	0.16	0.42
giant	(0.157,0.169]	(0.427,0.444]	2	-0.0084	-1.11304	0.16	0.44
giant	(0.157,0.169]	(0.444,0.464]	5	-0.0105	-1.40221	0.16	0.45
giant	(0.157,0.169]	(0.464,0.483]	11	-0.0126364	-1.69639	0.16	0.47
giant	(0.157,0.169]	(0.483,0.5]	4	-0.013	-1.74646	0.16	0.49
giant	(0.169,0.185]	[0,0.0459]	48	0.00265	0.408545	0.18	0.02
giant	(0.169,0.185]	(0.0459,0.0618]	263	0.00273878	0.42077	0.18	0.05
giant	(0.169,0.185]	(0.0618,0.0765]	682	0.00282214	0.432248	0.18	0.07
giant	(0.169,0.185]	(0.0765,0.0899]	878	0.00150866	0.251381	0.18	0.08
giant	(0.169,0.185]	(0.0899,0.101]	1549	0.00115791	0.203083	0.18	0.1
giant	(0.169,0.185]	(0.101,0.112]	3166	0.00119918	0.208766	0.18	0.11
giant	(0.169,0.185]	(0.112,0.129]	5239	0.000462703	0.107354	0.18	0.12
giant	(0.169,0.185]	(0.129,0.143]	7005	0.000283583	0.0826888	0.18	0.14
giant	(0.169,0.185]	(0.143,0.157]	6349	-4.82281e-05	0.0369984	0.18	0.15
giant	(0.169,0.185]	(0.157,0.169]	10091	5.03518e-05	0.0505728	0.18	0.16
giant	(0.169,0.185]	(0.169,0.185]	10093	-4.50213e-05	0.0374399	0.18	0.18
giant	(0.169,0.185]	(0.185,0.202]	9172	-0.000221686	0.0131133	0.18	0.19
giant	(0.169,0.185]	(0.202,0.219]	8705	-0.00050224	-0.0255191	0.18	0.21
giant	(0.169,0.185]	(0.219,0.23]	6911	-0.000515526	-0.0273486	0.18	0.22
giant	(0.169,0.185]	(0.23,0.25]	6729	-0.000981082	-0.0914557	0.18	0.24
giant	(0.169,0.185]	(0.25,0.265]	3549	-0.000270161	0.00643823	0.18	0.26
giant	(0.169,0.185]	(0.265,0.281]	2455	-0.000383096	-0.00911295	0.18	0.27
giant	(0.169,0.185]	(0.281,0.298]	1413	-0.000975796	-0.0907279	0.18	0.29
giant	(0.169,0.185]	(0.298,0.316]	1067	-0.00198988	-0.230367	0.18	0.31
giant	(0.169,0.185]	(0.316,0.337]	453	-0.00101943	-0.0967357	0.18	0.33
giant	(0.169,0.185]	(0.337,0.352]	168	0.00777202	1.11385	0.18	0.34
giant	(0.169,0.185]	(0.352,0.371]	50	0.00243	0.378251	0.18	0.36
giant	(0.169,0.185]	(0.371,0.388]	34	-0.00108529	-0.105806	0.18	0.38
giant	(0.169,0.185]	(0.388,0.408]	41	-0.0053878	-0.698262	0.18	0.4
giant	(0.169,0.185]	(0.408,0.427]	8	0.0017375	0.282893	0.18	0.42
giant	(0.169,0.185]	(0.427,0.444]	19	-0.00960526	-1.27901	0.18	0.44
giant	(0.169,0.185]	(0.444,0.464]	8	-0.0116375	-1.55885	0.18	0.45
giant	(0.185,0.202]	[0,0.0459]	6	-0.00531667	-0.688466	0.19	0.02
giant	(0.185,0.202]	(0.0459,0.0618]	80	0.000405	0.0994079	0.19	0.05
giant	(0.185,0.202]	(0.0618,0.0765]	237	0.000805063	0.154497	0.19	0.07
giant	(0.185,0.202]	(0.0765,0.0899]	318	0.000760063	0.1483	0.19	0.08
giant	(0.185,0.202]	(0.0899,0.101]	746	0.000830295	0.157971	0.19	0.1
giant	(0.185,0.202]	(0.101,0.112]	1526	0.000990433	0.180022	0.19	0.11
giant	(0.185,0.202]	(0.112,0.129]	2590	0.000272857	0.0812118	0.19	0.12
giant	(0.185,0.202]	(0.129,0.143]	3635	0.000577772	0.123199	0.19	0.14
giant	(0.185,0.202]	(0.143,0.157]	3858	0.000318792	0.0875371	0.19	0.15
giant	(0.185,0.202]	(0.157,0.169]	6528	0.000254565	0.078693	0.19	0.16
giant	(0.185,0.202]	(0.169,0.185]	6686	-0.000363775	-0.00645249	0.19	0.18
giant	(0.185,0.202]	(0.185,0.202]	6985	-0.000533701	-0.0298513	0.19	0.19
giant	(0.185,0.202]	(0.202,0.219]	7010	-0.000544964	-0.0314023	0.19	0.21
giant	(0.185,0.202]	(0.219,0.23]	6104	-0.000895675	-0.0796952	0.19	0.22
giant	(0.185,0.202]	(0.23,0.25]	6291	-0.000673359	-0.0490822	0.19	0.24
giant	(0.185,0.202]	(0.25,0.265]	3535	-0.00102223	-0.0971225	0.19	0.26
giant	(0.185,0.202]	(0.265,0.281]	2425	-0.000823629	-0.0697744	0.19	0.27
giant	(0.185,0.202]	(0.281,0.298]	1621	-0.00176132	-0.198895	0.19	0.29
giant	(0.185,0.202]	(0.298,0.316]	1340	-0.000862612	-0.0751424	0.19	0.31
giant	(0.185,0.202]	(0.316,0.337]	695	-0.000982302	-0.0916237	0.19	0.33
giant	(0.185,0.202]	(0.337,0.352]	239	-7.69874e-05	0.0330382	0.19	0.34
giant	(0.185,0.202]	(0.352,0.371]	203	0.000466995	0.107945	0.19	0.36
giant	(0.185,0.202]	(0.371,0.388]	79	-0.000612658	-0.0407237	0.19	0.38
giant	(0.185,0.202]	(0.388,0.408]	39	0.00054359	0.118492	0.19	0.4
giant	(0.185,0.202]	(0.408,0.427]	13	-0.00425385	-0.542116	0.19	0.42
giant	(0.185,0.202]	(0.427,0.444]	7	-0.00527143	-0.682237	0.19	0.44
giant	(0.185,0.202]	(0.444,0.464]	5	-0.00564	-0.732989	0.19	0.45
giant	(0.185,0.202]	(0.464,0.483]	2	-0.0125	-1.67761	0.19	0.47
giant	(0.202,0.219]	[0,0.0459]	12	0.025575	3.56532	0.21	0.02
giant	(0.202,0.219]	(0.0459,0.0618]	28	0.00481786	0.707059	0.21	0.05
giant	(0.202,0.219]	(0.0618,0.0765]	191	0.00191885	0.307865	0.21	0.07
giant	(0.202,0.219]	(0.0765,0.0899]	333	-0.00116366	-0.116597	0.21	0.08
giant	(0.202,0.219]	(0.0899,0.101]	477	-0.000612579	-0.0407128	0.21	0.1
giant	(0.202,0.219]	(0.101,0.112]	1254	0.000999761	0.181307	0.21	0.11
giant	(0.202,0.219]	(0.112,0.129]	2355	0.000322845	0.0880952	0.21	0.12
giant	(0.202,0.219]	(0.129,0.143]	3373	0.000447317	0.105235	0.21	0.14
giant	(0.202,0.219]	(0.143,0.157]	3981	0.000738483	0.145329	0.21	0.15
giant	(0.202,0.219]	(0.157,0.169]	6642	0.000452243	0.105913	0.21	0.16
giant	(0.202,0.219]	(0.169,0.185]	7977	0.000171706	0.0672833	0.21	0.18
giant	(0.202,0.219]	(0.185,0.202]	8993	-0.000193284	0.0170242	0.21	0.19
giant	(0.202,0.219]	(0.202,0.219]	8887	-0.000329166	-0.00168684	0.21	0.21
giant	(0.202,0.219]	(0.219,0.23]	8586	-0.000244759	0.00993605	0.21	0.22
giant	(0.202,0.219]	(0.23,0.25]	9702	-0.000458215	-0.0194569	0.21	0.24
giant	(0.202,0.219]	(0.25,0.265]	6067	-0.000795302	-0.0658739	0.21	0.26
giant	(0.202,0.219]	(0.265,0.281]	4474	-0.000812137	-0.068192	0.21	0.27
giant	(0.202,0.219]	(0.281,0.298]	3306	-0.00127502	-0.13193	0.21	0.29
giant	(0.202,0.219]	(0.298,0.316]	2775	-0.000854018	-0.073959	0.21	0.31
giant	(0.202,0.219]	(0.316,0.337]	1500	-0.0015034	-0.163379	0.21	0.33
giant	(0.202,0.219]	(0.337,0.352]	671	-0.00143159	-0.153491	0.21	0.34
giant	(0.202,0.219]	(0.352,0.371]	394	-0.00230888	-0.274294	0.21	0.36
giant	(0.202,0.219]	(0.371,0.388]	280	0.00178	0.288746	0.21	0.38
giant	(0.202,0.219]	(0.388,0.408]	204	0.0024402	0.379655	0.21	0.4
giant	(0.202,0.219]	(0.408,0.427]	38	-0.00557105	-0.723495	0.21	0.42
giant	(0.202,0.219]	(0.427,0.444]	49	-0.0045102	-0.577416	0.21	0.44
giant	(0.202,0.219]	(0.444,0.464]	10	-0.00478	-0.614567	0.21	0.45
giant	(0.202,0.219]	(0.464,0.483]	3	-0.00583333	-0.759611	0.21	0.47
giant	(0.219,0.23]	[0,0.0459]	4	0.004825	0.708042	0.22	0.02
giant	(0.219,0.23]	(0.0459,0.0618]	5	0.00486	0.712862	0.22	0.05
giant	(0.219,0.23]	(0.0618,0.0765]	49	0.0026102	0.403065	0.22	0.07
giant	(0.219,0.23]	(0.0765,0.0899]	79	0.00228861	0.358781	0.22	0.08
giant	(0.219,0.23]	(0.0899,0.101]	151	0.0028894	0.441511	0.22	0.1
giant	(0.219,0.23]	(0.101,0.112]	871	0.00213088	0.337062	0.22	0.11
giant	(0.219,0.23]	(0.112,0.129]	1337	0.00110778	0.196181	0.22	0.12
giant	(0.219,0.23]	(0.129,0.143]	2100	0.000728905	0.14401	0.22	0.14
giant	(0.219,0.23]	(0.143,0.157]	2442	0.00148456	0.248064	0.22	0.15
giant	(0.219,0.23]	(0.157,0.169]	4267	0.000501031	0.112631	0.22	0.16
giant	(0.219,0.23]	(0.169,0.185]	6069	0.000550338	0.119421	0.22	0.18
giant	(0.219,0.23]	(0.185,0.202]	7281	0.000175319	0.0677809	0.22	0.19
giant	(0.219,0.23]	(0.202,0.219]	7555	-0.000311436	0.000754588	0.22	0.21
giant	(0.219,0.23]	(0.219,0.23]	7711	-0.000363572	-0.00642446	0.22	0.22
giant	(0.219,0.23]	(0.23,0.25]	9707	-0.000155156	0.0222744	0.22	0.24
giant	(0.219,0.23]	(0.25,0.265]	6254	-0.000371122	-0.00746423	0.22	0.26
giant	(0.219,0.23]	(0.265,0.281]	5125	-0.000584	-0.0367775	0.22	0.27
giant	(0.219,0.23]	(0.281,0.298]	3745	-0.000583418	-0.0366973	0.22	0.29
giant	(0.219,0.23]	(0.298,0.316]	3871	-0.000636373	-0.0439893	0.22	0.31
giant	(0.219,0.23]	(0.316,0.337]	2059	-0.00136489	-0.144306	0.22	0.33
giant	(0.219,0.23]	(0.337,0.352]	959	-0.000611366	-0.0405458	0.22	0.34
giant	(0.219,0.23]	(0.352,0.371]	489	-0.00173824	-0.195717	0.22	0.36
giant	(0.219,0.23]	(0.371,0.388]	353	-0.00146997	-0.158776	0.22	0.38
giant	(0.219,0.23]	(0.388,0.408]	278	0.000460072	0.106991	0.22	0.4
giant	(0.219,0.23]	(0.408,0.427]	54	-0.00277593	-0.338606	0.22	0.42
giant	(0.219,0.23]	(0.427,0.444]	53	-0.00461698	-0.592119	0.22	0.44
giant	(0.219,0.23]	(0.444,0.464]	27	-0.00288148	-0.353141	0.22	0.45
giant	(0.219,0.23]	(0.464,0.483]	7	-0.00188571	-0.216024	0.22	0.47
giant	(0.23,0.25]	(0.0459,0.0618]	26	0.00382308	0.570078	0.24	0.05
giant	(0.23,0.25]	(0.0618,0.0765]	45	0.0119378	1.68747	0.24	0.07
giant	(0.23,0.25]	(0.0765,0.0899]	35	-0.00481714	-0.619682	0.24	0.08
giant	(0.23,0.25]	(0.0899,0.101]	83	0.00116988	0.204732	0.24	0.1
giant	(0.23,0.25]	(0.101,0.112]	325	0.00168738	0.275992	0.24	0.11
giant	(0.23,0.25]	(0.112,0.129]	664	0.00140437	0.237021	0.24	0.12
giant	(0.23,0.25]	(0.129,0.143]	1200	0.000705583	0.140798	0.24	0.14
giant	(0.23,0.25]	(0.143,0.157]	1599	0.00153446	0.254935	0.24	0.15
giant	(0.23,0.25]	(0.157,0.169]	3081	0.00124706	0.21536	0.24	0.16
giant	(0.23,0.25]	(0.169,0.185]	4627	0.000670499	0.135967	0.24	0.18
giant	(0.23,0.25]	(0.185,0.202]	6064	0.000701319	0.140211	0.24	0.19
giant	(0.23,0.25]	(0.202,0.219]	7251	0.000384278	0.0965545	0.24	0.21
giant	(0.23,0.25]	(0.219,0.23]	7831	6.04265e-05	0.0519601	0.24	0.22
giant	(0.23,0.25]	(0.23,0.25]	11034	-0.000111283	0.0283157	0.24	0.24
giant	(0.23,0.25]	(0.25,0.265]	8185	-0.000241857	0.0103356	0.24	0.26
giant	(0.23,0.25]	(0.265,0.281]	6499	-0.000383428	-0.00915873	0.24	0.27
giant	(0.23,0.25]	(0.281,0.298]	5869	-0.000645238	-0.0452099	0.24	0.29
giant	(0.23,0.25]	(0.298,0.316]	5704	-0.000580593	-0.0363083	0.24	0.31
giant	(0.23,0.25]	(0.316,0.337]	3618	-0.00146575	-0.158195	0.24	0.33
giant	(0.23,0.25]	(0.337,0.352]	1869	-0.00141717	-0.151506	0.24	0.34
giant	(0.23,0.25]	(0.352,0.371]	1315	-0.000681825	-0.050248	0.24	0.36
giant	(0.23,0.25]	(0.371,0.388]	869	-0.000496203	-0.0246878	0.24	0.38
giant	(0.23,0.25]	(0.388,0.408]	516	-0.00124729	-0.128112	0.24	0.4
giant	(0.23,0.25]	(0.408,0.427]	191	-0.00159529	-0.176032	0.24	0.42
giant	(0.23,0.25]	(0.427,0.444]	82	0.000903659	0.168073	0.24	0.44
giant	(0.23,0.25]	(0.444,0.464]	30	-0.00426667	-0.543881	0.24	0.45
giant	(0.23,0.25]	(0.464,0.483]	8	-0.0034875	-0.43659	0.24	0.47
giant	(0.23,0.25]	(0.483,0.5]	8	-0.0026375	-0.319545	0.24	0.49
giant	(0.25,0.265]	[0,0.0459]	1	0.0064	0.92492	0.26	0.02
giant	(0.25,0.265]	(0.0459,0.0618]	14	0.00308571	0.468543	0.26	0.05
giant	(0.25,0.265]	(0.0618,0.0765]	5	0.00494	0.723878	0.26	0.07
giant	(0.25,0.265]	(0.0765,0.0899]	26	-0.0118423	-1.58705	0.26	0.08
giant	(0.25,0.265]	(0.0899,0.101]	40	-0.00024	0.0105914	0.26	0.1
giant	(0.25,0.265]	(0.101,0.112]	187	0.00168824	0.27611	0.26	0.11
giant	(0.25,0.265]	(0.112,0.129]	452	0.00152677	0.253876	0.26	0.12
giant	(0.25,0.265]	(0.129,0.143]	644	0.00162314	0.267145	0.26	0.14
giant	(0.25,0.265]	(0.143,0.157]	1067	0.00085164	0.16091	0.26	0.15
giant	(0.25,0.265]	(0.157,0.169]	2118	0.0010034	0.181808	0.26	0.16
giant	(0.25,0.265]	(0.169,0.185]	3025	0.00141306	0.238218	0.26	0.18
giant	(0.25,0.265]	(0.185,0.202]	4277	0.000524924	0.115921	0.26	0.19
giant	(0.25,0.265]	(0.202,0.219]	5612	0.000646775	0.1327	0.26	0.21
giant	(0.25,0.265]	(0.219,0.23]	6996	0.000400643	0.098808	0.26	0.22
giant	(0.25,0.265]	(0.23,0.25]	10657	-0.000204992	0.015412	0.26	0.24
giant	(0.25,0.265]	(0.25,0.265]	7897	0.000132797	0.0619256	0.26	0.26
giant	(0.25,0.265]	(0.265,0.281]	7086	-0.000382797	-0.00907182	0.26	0.27
giant	(0.25,0.265]	(0.281,0.298]	6221	-0.000493233	-0.0242788	0.26	0.29
giant	(0.25,0.265]	(0.298,0.316]	7491	-0.000730917	-0.057008	0.26	0.31
giant	(0.25,0.265]	(0.316,0.337]	5480	-0.00108631	-0.105946	0.26	0.33
giant	(0.25,0.265]	(0.337,0.352]	2818	-0.00108055	-0.105153	0.26	0.34
giant	(0.25,0.265]	(0.352,0.371]	2192	-0.00117172	-0.117706	0.26	0.36
giant	(0.25,0.265]	(0.371,0.388]	1332	-0.000740541	-0.0583331	0.26	0.38
giant	(0.25,0.265]	(0.388,0.408]	1035	-0.00099343	-0.093156	0.26	0.4
giant	(0.25,0.265]	(0.408,0.427]	345	6.86957e-05	0.0530988	0.26	0.42
giant	(0.25,0.265]	(0.427,0.444]	212	0.000323585	0.0881971	0.26	0.44
giant	(0.25,0.265]	(0.444,0.464]	121	-0.00180579	-0.205017	0.26	0.45
giant	(0.25,0.265]	(0.464,0.483]	36	-0.00106944	-0.103623	0.26	0.47
giant	(0.25,0.265]	(0.483,0.5]	17	-0.00233529	-0.277931	0.26	0.49
giant	(0.265,0.281]	(0.0618,0.0765]	2	-0.00035	-0.00455566	0.27	0.07
giant	(0.265,0.281]	(0.0765,0.0899]	4	-0.003	-0.369461	0.27	0.08
giant	(0.265,0.281]	(0.0899,0.101]	12	0.00315	0.477395	0.27	0.1
giant	(0.265,0.281]	(0.101,0.112]	55	0.00518545	0.757677	0.27	0.11
giant	(0.265,0.281]	(0.112,0.129]	140	0.000333571	0.0895722	0.27	0.12
giant	(0.265,0.281]	(0.129,0.143]	347	0.000579827	0.123482	0.27	0.14
giant	(0.265,0.281]	(0.143,0.157]	566	-0.000337456	-0.00282833	0.27	0.15
giant	(0.265,0.281]	(0.157,0.169]	1376	0.00126395	0.217686	0.27	0.16
giant	(0.265,0.281]	(0.169,0.185]	2056	0.00118273	0.206502	0.27	0.18
giant	(0.265,0.281]	(0.185,0.202]	3026	0.00100327	0.18179	0.27	0.19
giant	(0.265,0.281]	(0.202,0.219]	4126	0.00112193	0.19813	0.27	0.21
giant	(0.265,0.281]	(0.219,0.23]	6067	0.000817537	0.156214	0.27	0.22
giant	(0.265,0.281]	(0.23,0.25]	8943	-8.02751e-05	0.0325855	0.27	0.24
giant	(0.265,0.281]	(0.25,0.265]	7363	2.78962e-05	0.0474807	0.27	0.26
giant	(0.265,0.281]	(0.265,0.281]	7588	-0.00053777	-0.0304116	0.27	0.27
giant	(0.265,0.281]	(0.281,0.298]	7022	-0.00024728	0.0095889	0.27	0.29
giant	(0.265,0.281]	(0.298,0.316]	8118	-0.000288027	0.00397808	0.27	0.31
giant	(0.265,0.281]	(0.316,0.337]	6779	-0.000895707	-0.0796996	0.27	0.33
giant	(0.265,0.281]	(0.337,0.352]	3740	-0.00083754	-0.07169	0.27	0.34
giant	(0.265,0.281]	(0.352,0.371]	2539	-0.000706459	-0.0536401	0.27	0.36
giant	(0.265,0.281]	(0.371,0.388]	1987	-0.00131575	-0.13754	0.27	0.38
giant	(0.265,0.281]	(0.388,0.408]	1773	-0.00102414	-0.0973848	0.27	0.4
giant	(0.265,0.281]	(0.408,0.427]	690	-0.00157696	-0.173508	0.27	0.42
giant	(0.265,0.281]	(0.427,0.444]	399	0.00028797	0.0832929	0.27	0.44
giant	(0.265,0.281]	(0.444,0.464]	173	-0.000436416	-0.0164552	0.27	0.45
giant	(0.265,0.281]	(0.464,0.483]	71	-0.00190141	-0.218185	0.27	0.47
giant	(0.265,0.281]	(0.483,0.5]	59	-0.000538983	-0.0305786	0.27	0.49
giant	(0.281,0.298]	[0,0.0459]	1	0.0035	0.52559	0.29	0.02
giant	(0.281,0.298]	(0.0459,0.0618]	2	0.0069	0.99377	0.29	0.05
giant	(0.281,0.298]	(0.0899,0.101]	8	0.0019375	0.310433	0.29	0.1
giant	(0.281,0.298]	(0.101,0.112]	72	0.0157458	2.21184	0.29	0.11
giant	(0.281,0.298]	(0.112,0.129]	77	0.00410909	0.609462	0.29	0.12
giant	(0.281,0.298]	(0.129,0.143]	220	0.000462727	0.107357	0.29	0.14
giant	(0.281,0.298]	(0.143,0.157]	324	0.00253364	0.392522	0.29	0.15
giant	(0.281,0.298]	(0.157,0.169]	642	0.000889097	0.166068	0.29	0.16
giant	(0.281,0.298]	(0.169,0.185]	1275	0.000492471	0.111453	0.29	0.18
giant	(0.281,0.298]	(0.185,0.202]	2106	0.00173338	0.282326	0.29	0.19
giant	(0.281,0.298]	(0.202,0.219]	3101	0.000507546	0.113529	0.29	0.21
giant	(0.281,0.298]	(0.219,0.23]	4081	0.000971306	0.177388	0.29	0.22
giant	(0.281,0.298]	(0.23,0.25]	7247	0.000168773	0.0668795	0.29	0.24
giant	(0.281,0.298]	(0.25,0.265]	6742	-0.000258959	0.00798073	0.29	0.26
giant	(0.281,0.298]	(0.265,0.281]	7254	-0.000140033	0.0243568	0.29	0.27
giant	(0.281,0.298]	(0.281,0.298]	7158	-0.00046865	-0.0208938	0.29	0.29
giant	(0.281,0.298]	(0.298,0.316]	9491	-0.000638774	-0.0443198	0.29	0.31
giant	(0.281,0.298]	(0.316,0.337]	7697	-0.000320294	-0.000465089	0.29	0.33
giant	(0.281,0.298]	(0.337,0.352]	4532	-0.000593447	-0.0380783	0.29	0.34
giant	(0.281,0.298]	(0.352,0.371]	4204	-0.00125733	-0.129495	0.29	0.36
giant	(0.281,0.298]	(0.371,0.388]	3251	-0.000362442	-0.00626897	0.29	0.38
giant	(0.281,0.298]	(0.388,0.408]	2544	-0.00154167	-0.168648	0.29	0.4
giant	(0.281,0.298]	(0.408,0.427]	1044	-0.00156801	-0.172275	0.29	0.42
giant	(0.281,0.298]	(0.427,0.444]	887	-0.00190113	-0.218146	0.29	0.44
giant	(0.281,0.298]	(0.444,0.464]	493	-0.00168357	-0.188188	0.29	0.45
giant	(0.281,0.298]	(0.464,0.483]	189	-0.00114656	-0.114242	0.29	0.47
giant	(0.281,0.298]	(0.483,0.5]	164	0.00127439	0.219123	0.29	0.49
giant	(0.298,0.316]	(0.0459,0.0618]	3	0.0047	0.69083	0.31	0.05
giant	(0.298,0.316]	(0.0618,0.0765]	1	-0.0045	-0.576011	0.31	0.07
giant	(0.298,0.316]	(0.0899,0.101]	2	0.0195	2.72879	0.31	0.1
giant	(0.298,0.316]	(0.101,0.112]	3	0.00413333	0.6128	0.31	0.11
giant	(0.298,0.316]	(0.112,0.129]	19	0.00174211	0.283527	0.31	0.12
giant	(0.298,0.316]	(0.129,0.143]	50	0.002656	0.409371	0.31	0.14
giant	(0.298,0.316]	(0.143,0.157]	103	0.000428155	0.102596	0.31	0.15
giant	(0.298,0.316]	(0.157,0.169]	337	0.000192582	0.0701579	0.31	0.16
giant	(0.298,0.316]	(0.169,0.185]	623	0.000753933	0.147456	0.31	0.18
giant	(0.298,0.316]	(0.185,0.202]	1184	0.000955574	0.175222	0.31	0.19
giant	(0.298,0.316]	(0.202,0.219]	1971	0.000637849	0.131471	0.31	0.21
giant	(0.298,0.316]	(0.219,0.23]	3006	0.00100063	0.181427	0.31	0.22
giant	(0.298,0.316]	(0.23,0.25]	5629	0.00117174	0.204988	0.31	0.24
giant	(0.298,0.316]	(0.25,0.265]	5355	0.000222372	0.07426	0.31	0.26
giant	(0.298,0.316]	(0.265,0.281]	6938	0.00021019	0.0725826	0.31	0.27
giant	(0.298,0.316]	(0.281,0.298]	7168	-1.01144e-05	0.0422466	0.31	0.29
giant	(0.298,0.316]	(0.298,0.316]	9740	-0.000499877	-0.0251937	0.31	0.31
giant	(0.298,0.316]	(0.316,0.337]	9004	-0.000103498	0.0293876	0.31	0.33
giant	(0.298,0.316]	(0.337,0.352]	6009	-0.000187985	0.0177539	0.31	0.34
giant	(0.298,0.316]	(0.352,0.371]	4879	-0.000159377	0.0216932	0.31	0.36
giant	(0.298,0.316]	(0.371,0.388]	4383	-0.000914305	-0.0822606	0.31	0.38
giant	(0.298,0.316]	(0.388,0.408]	4334	-0.00116546	-0.116844	0.31	0.4
giant	(0.298,0.316]	(0.408,0.427]	1722	-0.00134733	-0.141888	0.31	0.42
giant	(0.298,0.316]	(0.427,0.444]	1064	-0.00156645	-0.172061	0.31	0.44
giant	(0.298,0.316]	(0.444,0.464]	1033	-0.000921007	-0.0831834	0.31	0.45
giant	(0.298,0.316]	(0.464,0.483]	478	0.000170711	0.0671463	0.31	0.47
giant	(0.298,0.316]	(0.483,0.5]	275	-0.00167709	-0.187296	0.31	0.49
giant	(0.316,0.337]	(0.0459,0.0618]	1	0.0042	0.62198	0.33	0.05
giant	(0.316,0.337]	(0.101,0.112]	1	0.004	0.59444	0.33	0.11
giant	(0.316,0.337]	(0.112,0.129]	27	0.00087037	0.163489	0.33	0.12
giant	(0.316,0.337]	(0.129,0.143]	29	0.000258621	0.0792515	0.33	0.14
giant	(0.316,0.337]	(0.143,0.157]	144	-0.000161806	0.0213587	0.33	0.15
giant	(0.316,0.337]	(0.157,0.169]	192	0.00280365	0.429702	0.33	0.16
giant	(0.316,0.337]	(0.169,0.185]	369	0.000725745	0.143575	0.33	0.18
giant	(0.316,0.337]	(0.185,0.202]	610	0.000173443	0.0675224	0.33	0.19
giant	(0.316,0.337]	(0.202,0.219]	1150	0.000773478	0.150147	0.33	0.21
giant	(0.316,0.337]	(0.219,0.23]	1851	0.00124003	0.214392	0.33	0.22
giant	(0.316,0.337]	(0.23,0.25]	3907	0.000718838	0.142623	0.33	0.24
giant	(0.316,0.337]	(0.25,0.265]	4239	0.000400189	0.0987454	0.33	0.26
giant	(0.316,0.337]	(0.265,0.281]	5267	0.000186463	0.0693153	0.33	0.27
giant	(0.316,0.337]	(0.281,0.298]	6097	0.000237723	0.0763739	0.33	0.29
giant	(0.316,0.337]	(0.298,0.316]	8942	9.03265e-05	0.0560774	0.33	0.31
giant	(0.316,0.337]	(0.316,0.337]	9038	-0.000237641	0.0109162	0.33	0.33
giant	(0.316,0.337]	(0.337,0.352]	6694	-0.000216522	0.0138242	0.33	0.34
giant	(0.316,0.337]	(0.352,0.371]	6037	-0.000534852	-0.0300098	0.33	0.36
giant	(0.316,0.337]	(0.371,0.388]	5372	-0.000253574	0.0087222	0.33	0.38
giant	(0.316,0.337]	(0.388,0.408]	5534	-0.000690007	-0.0513747	0.33	0.4
giant	(0.316,0.337]	(0.408,0.427]	2629	-0.000663218	-0.0476858	0.33	0.42
giant	(0.316,0.337]	(0.427,0.444]	2272	-0.000248327	0.00944466	0.33	0.44
giant	(0.316,0.337]	(0.444,0.464]	1421	-0.0011848	-0.119508	0.33	0.45
giant	(0.316,0.337]	(0.464,0.483]	830	-0.000383614	-0.00918438	0.33	0.47
giant	(0.316,0.337]	(0.483,0.5]	610	-0.00154049	-0.168487	0.33	0.49
giant	(0.337,0.352]	(0.0765,0.0899]	1	-0.0015	-0.162911	0.34	0.08
giant	(0.337,0.352]	(0.0899,0.101]	1	0.0056	0.81476	0.34	0.1
giant	(0.337,0.352]	(0.112,0.129]	4	-0.0015	-0.162911	0.34	0.12
giant	(0.337,0.352]	(0.129,0.143]	10	-0.0002	0.0160994	0.34	0.14
giant	(0.337,0.352]	(0.143,0.157]	37	0.00456216	0.67185	0.34	0.15
giant	(0.337,0.352]	(0.157,0.169]	121	0.0079562	1.13921	0.34	0.16
giant	(0.337,0.352]	(0.169,0.185]	248	-0.000510887	-0.0267098	0.34	0.18
giant	(0.337,0.352]	(0.185,0.202]	377	0.000448806	0.10544	0.34	0.19
giant	(0.337,0.352]	(0.202,0.219]	719	0.00127399	0.219068	0.34	0.21
giant	(0.337,0.352]	(0.219,0.23]	1270	0.00205268	0.326293	0.34	0.22
giant	(0.337,0.352]	(0.23,0.25]	2613	0.00159793	0.263675	0.34	0.24
giant	(0.337,0.352]	(0.25,0.265]	2881	0.00106519	0.190316	0.34	0.26
giant	(0.337,0.352]	(0.265,0.281]	4321	-6.09581e-05	0.0352454	0.34	0.27
giant	(0.337,0.352]	(0.281,0.298]	4745	0.000340674	0.0905503	0.34	0.29
giant	(0.337,0.352]	(0.298,0.316]	8029	0.000109329	0.058694	0.34	0.31
giant	(0.337,0.352]	(0.316,0.337]	8841	0.000417883	0.101182	0.34	0.33
giant	(0.337,0.352]	(0.337,0.352]	7035	0.00011403	0.0593413	0.34	0.34
giant	(0.337,0.352]	(0.352,0.371]	6220	-0.000526752	-0.0288945	0.34	0.36
giant	(0.337,0.352]	(0.371,0.388]	6382	-0.000547994	-0.0318195	0.34	0.38
giant	(0.337,0.352]	(0.388,0.408]	7006	-0.000367913	-0.00702231	0.34	0.4
giant	(0.337,0.352]	(0.408,0.427]	3542	-0.00119184	-0.120477	0.34	0.42
giant	(0.337,0.352]	(0.427,0.444]	3100	-0.000337839	-0.00288105	0.34	0.44
giant	(0.337,0.352]	(0.444,0.464]	2475	-1.75758e-05	0.0412192	0.34	0.45
giant	(0.337,0.352]	(0.464,0.483]	1480	-0.000547432	-0.0317421	0.34	0.47
giant	(0.337,0.352]	(0.483,0.5]	1098	-0.00201038	-0.233191	0.34	0.49
giant	(0.352,0.371]	[0,0.0459]	2	0.0066	0.95246	0.36	0.02
giant	(0.352,0.371]	(0.101,0.112]	1	0.0096	1.36556	0.36	0.11
giant	(0.352,0.371]	(0.112,0.129]	1	-0.0047	-0.603551	0.36	0.12
giant	(0.352,0.371]	(0.129,0.143]	13	0.00116923	0.204643	0.36	0.14
giant	(0.352,0.371]	(0.143,0.157]	15	-6.66667e-06	0.0427214	0.36	0.15
giant	(0.352,0.371]	(0.157,0.169]	20	-0.000135	0.0250499	0.36	0.16
giant	(0.352,0.371]	(0.169,0.185]	85	0.00116	0.203372	0.36	0.18
giant	(0.352,0.371]	(0.185,0.202]	244	0.000809016	0.155041	0.36	0.19
giant	(0.352,0.371]	(0.202,0.219]	414	0.0024401	0.379641	0.36	0.21
giant	(0.352,0.371]	(0.219,0.23]	821	0.00169732	0.277361	0.36	0.22
giant	(0.352,0.371]	(0.23,0.25]	2089	0.00163739	0.269108	0.36	0.24
giant	(0.352,0.371]	(0.25,0.265]	2572	0.00107364	0.19148	0.36	0.26
giant	(0.352,0.371]	(0.265,0.281]	3542	0.00107338	0.191443	0.36	0.27
giant	(0.352,0.371]	(0.281,0.298]	4803	0.000311993	0.0866008	0.36	0.29
giant	(0.352,0.371]	(0.298,0.316]	8388	0.000144433	0.0635278	0.36	0.31
giant	(0.352,0.371]	(0.316,0.337]	10387	0.00010775	0.0584766	0.36	0.33
giant	(0.352,0.371]	(0.337,0.352]	8032	-2.39666e-05	0.0403392	0.36	0.34
giant	(0.352,0.371]	(0.352,0.371]	8407	-3.71952e-05	0.0385176	0.36	0.36
giant	(0.352,0.371]	(0.371,0.388]	9053	-0.00029081	0.00359485	0.36	0.38
giant	(0.352,0.371]	(0.388,0.408]	11384	-0.000448568	-0.0181285	0.36	0.4
giant	(0.352,0.371]	(0.408,0.427]	6033	-0.000785132	-0.0644734	0.36	0.42
giant	(0.352,0.371]	(0.427,0.444]	5507	-0.000735754	-0.0576741	0.36	0.44
giant	(0.352,0.371]	(0.444,0.464]	5085	-7.04818e-05	0.033934	0.36	0.45
giant	(0.352,0.371]	(0.464,0.483]	3375	-0.000465067	-0.0204004	0.36	0.47
giant	(0.352,0.371]	(0.483,0.5]	2756	-0.000989877	-0.0926667	0.36	0.49
giant	(0.371,0.388]	(0.0618,0.0765]	1	0.0077	1.10393	0.38	0.07
giant	(0.371,0.388]	(0.143,0.157]	1	0.015	2.10914	0.38	0.15
giant	(0.371,0.388]	(0.157,0.169]	10	0.0082	1.17278	0.38	0.16
giant	(0.371,0.388]	(0.169,0.185]	43	0.0062814	0.908588	0.38	0.18
giant	(0.371,0.388]	(0.185,0.202]	35	-0.000888571	-0.078717	0.38	0.19
giant	(0.371,0.388]	(0.202,0.219]	200	0.002271	0.356356	0.38	0.21
giant	(0.371,0.388]	(0.219,0.23]	316	0.00148291	0.247836	0.38	0.22
giant	(0.371,0.388]	(0.23,0.25]	863	0.00143546	0.241302	0.38	0.24
giant	(0.371,0.388]	(0.25,0.265]	1137	0.001035	0.18616	0.38	0.26
giant	(0.371,0.388]	(0.265,0.281]	1760	0.00166898	0.273458	0.38	0.27
giant	(0.371,0.388]	(0.281,0.298]	2630	0.000942243	0.173386	0.38	0.29
giant	(0.371,0.388]	(0.298,0.316]	4826	0.000670866	0.136018	0.38	0.31
giant	(0.371,0.388]	(0.316,0.337]	6387	0.000606732	0.127187	0.38	0.33
giant	(0.371,0.388]	(0.337,0.352]	6271	0.00016192	0.0659358	0.38	0.34
giant	(0.371,0.388]	(0.352,0.371]	6381	-2.01379e-05	0.0408664	0.38	0.36
giant	(0.371,0.388]	(0.371,0.388]	7222	0.000125284	0.060891	0.38	0.38
giant	(0.371,0.388]	(0.388,0.408]	9213	-0.000228927	0.0121162	0.38	0.4
giant	(0.371,0.388]	(0.408,0.427]	5784	-0.000316684	3.19622e-05	0.38	0.42
giant	(0.371,0.388]	(0.427,0.444]	5644	-0.000518515	-0.0277602	0.38	0.44
giant	(0.371,0.388]	(0.444,0.464]	5155	-0.00103649	-0.0990853	0.38	0.45
giant	(0.371,0.388]	(0.464,0.483]	3694	-0.000472252	-0.0213898	0.38	0.47
giant	(0.371,0.388]	(0.483,0.5]	3500	-0.0007132	-0.0545683	0.38	0.49
giant	(0.388,0.408]	(0.0765,0.0899]	1	0.0053	0.77345	0.4	0.08
giant	(0.388,0.408]	(0.101,0.112]	1	0.002	0.31904	0.4	0.11
giant	(0.388,0.408]	(0.157,0.169]	1	0.0059	0.85607	0.4	0.16
giant	(0.388,0.408]	(0.169,0.185]	13	-0.00766923	-1.01241	0.4	0.18
giant	(0.388,0.408]	(0.185,0.202]	37	0.00616486	0.892542	0.4	0.19
giant	(0.388,0.408]	(0.202,0.219]	54	0.00165926	0.27212	0.4	0.21
giant	(0.388,0.408]	(0.219,0.23]	169	-0.00500828	-0.646002	0.4	0.22
giant	(0.388,0.408]	(0.23,0.25]	546	0.0014978	0.249887	0.4	0.24
giant	(0.388,0.408]	(0.25,0.265]	788	0.00130825	0.223785	0.4	0.26
giant	(0.388,0.408]	(0.265,0.281]	1060	0.000769811	0.149642	0.4	0.27
giant	(0.388,0.408]	(0.281,0.298]	1489	0.000908596	0.168753	0.4	0.29
giant	(0.388,0.408]	(0.298,0.316]	3355	0.000530224	0.116651	0.4	0.31
giant	(0.388,0.408]	(0.316,0.337]	5019	0.000108348	0.0585589	0.4	0.33
giant	(0.388,0.408]	(0.337,0.352]	5297	-5.10478e-05	0.0366101	0.4	0.34
giant	(0.388,0.408]	(0.352,0.371]	5772	0.000296743	0.0845009	0.4	0.36
giant	(0.388,0.408]	(0.371,0.388]	6740	0.000273769	0.0813373	0.4	0.38
giant	(0.388,0.408]	(0.388,0.408]	9296	-0.000227453	0.0123191	0.4	0.4
giant	(0.388,0.408]	(0.408,0.427]	6007	-0.000435925	-0.0163875	0.4	0.42
giant	(0.388,0.408]	(0.427,0.444]	6725	7.20446e-05	0.0535599	0.4	0.44
giant	(0.388,0.408]	(0.444,0.464]	6849	-0.000618149	-0.0414798	0.4	0.45
giant	(0.388,0.408]	(0.464,0.483]	5279	-0.000668327	-0.0483894	0.4	0.47
giant	(0.388,0.408]	(0.483,0.5]	5142	-0.00107322	-0.104143	0.4	0.49
giant	(0.408,0.427]	(0.112,0.129]	3	0.00253333	0.39248	0.42	0.12
giant	(0.408,0.427]	(0.129,0.143]	2	0.0046	0.67706	0.42	0.14
giant	(0.408,0.427]	(0.157,0.169]	1	0.006	0.86984	0.42	0.16
giant	(0.408,0.427]	(0.169,0.185]	9	0.00844444	1.20644	0.42	0.18
giant	(0.408,0.427]	(0.185,0.202]	10	0.0089	1.26917	0.42	0.19
giant	(0.408,0.427]	(0.202,0.219]	19	-0.00121579	-0.123775	0.42	0.21
giant	(0.408,0.427]	(0.219,0.23]	109	0.00311743	0.47291	0.42	0.22
giant	(0.408,0.427]	(0.23,0.25]	303	0.00238251	0.371711	0.42	0.24
giant	(0.408,0.427]	(0.25,0.265]	462	0.00152359	0.253438	0.42	0.26
giant	(0.408,0.427]	(0.265,0.281]	813	-0.000151046	0.0228404	0.42	0.27
giant	(0.408,0.427]	(0.281,0.298]	1238	0.000759855	0.148271	0.42	0.29
giant	(0.408,0.427]	(0.298,0.316]	2939	0.000884144	0.165386	0.42	0.31
giant	(0.408,0.427]	(0.316,0.337]	4102	0.00055685	0.120318	0.42	0.33
giant	(0.408,0.427]	(0.337,0.352]	4446	0.000175191	0.0677632	0.42	0.34
giant	(0.408,0.427]	(0.352,0.371]	5254	0.0002311	0.0754619	0.42	0.36
giant	(0.408,0.427]	(0.371,0.388]	7118	7.34897e-05	0.0537589	0.42	0.38
giant	(0.408,0.427]	(0.388,0.408]	11298	0.000280351	0.0822437	0.42	0.4
giant	(0.408,0.427]	(0.408,0.427]	7777	-9.42137e-05	0.0306661	0.42	0.42
giant	(0.408,0.427]	(0.427,0.444]	8595	-0.000370622	-0.00739538	0.42	0.44
giant	(0.408,0.427]	(0.444,0.464]	10356	-0.000255523	0.00845378	0.42	0.45
giant	(0.408,0.427]	(0.464,0.483]	8995	-0.000386392	-0.0095669	0.42	0.47
giant	(0.408,0.427]	(0.483,0.5]	8750	-0.00104985	-0.100925	0.42	0.49
giant	(0.427,0.444]	(0.101,0.112]	1	0.0046	0.67706	0.44	0.11
giant	(0.427,0.444]	(0.157,0.169]	10	0.00613	0.887741	0.44	0.16
giant	(0.427,0.444]	(0.169,0.185]	26	0.00973846	1.38463	0.44	0.18
giant	(0.427,0.444]	(0.185,0.202]	20	0.003605	0.540048	0.44	0.19
giant	(0.427,0.444]	(0.202,0.219]	15	0.00329333	0.497132	0.44	0.21
giant	(0.427,0.444]	(0.219,0.23]	56	0.000380357	0.0960146	0.44	0.22
giant	(0.427,0.444]	(0.23,0.25]	76	0.00201184	0.32067	0.44	0.24
giant	(0.427,0.444]	(0.25,0.265]	174	0.00152874	0.254146	0.44	0.26
giant	(0.427,0.444]	(0.265,0.281]	327	0.00155657	0.25798	0.44	0.27
giant	(0.427,0.444]	(0.281,0.298]	619	0.00109903	0.194976	0.44	0.29
giant	(0.427,0.444]	(0.298,0.316]	1554	0.000840283	0.159346	0.44	0.31
giant	(0.427,0.444]	(0.316,0.337]	2660	0.000513571	0.114358	0.44	0.33
giant	(0.427,0.444]	(0.337,0.352]	2785	0.000494542	0.111738	0.44	0.34
giant	(0.427,0.444]	(0.352,0.371]	4020	0.000414627	0.100734	0.44	0.36
giant	(0.427,0.444]	(0.371,0.388]	5943	0.000106529	0.0583084	0.44	0.38
giant	(0.427,0.444]	(0.388,0.408]	9634	0.000231877	0.0755688	0.44	0.4
giant	(0.427,0.444]	(0.408,0.427]	7476	0.000307718	0.0860122	0.44	0.42
giant	(0.427,0.444]	(0.427,0.444]	9849	0.000378099	0.0957037	0.44	0.44
giant	(0.427,0.444]	(0.444,0.464]	11709	-0.000531104	-0.0294937	0.44	0.45
giant	(0.427,0.444]	(0.464,0.483]	11144	-0.000402593	-0.0117978	0.44	0.47
giant	(0.427,0.444]	(0.483,0.5]	10540	-0.000554231	-0.0326784	0.44	0.49
giant	(0.444,0.464]	(0.129,0.143]	1	0.0091	1.29671	0.45	0.14
giant	(0.444,0.464]	(0.143,0.157]	1	0.0009	0.167569	0.45	0.15
giant	(0.444,0.464]	(0.185,0.202]	2	0.0083	1.18655	0.45	0.19
giant	(0.444,0.464]	(0.202,0.219]	3	-0.00903333	-1.20025	0.45	0.21
giant	(0.444,0.464]	(0.219,0.23]	31	0.000509677	0.113822	0.45	0.22
giant	(0.444,0.464]	(0.23,0.25]	41	0.00248049	0.385203	0.45	0.24
giant	(0.444,0.464]	(0.25,0.265]	75	0.0025	0.38789	0.45	0.26
giant	(0.444,0.464]	(0.265,0.281]	120	0.0013175	0.225059	0.45	0.27
giant	(0.444,0.464]	(0.281,0.298]	311	0.00168457	0.275604	0.45	0.29
giant	(0.444,0.464]	(0.298,0.316]	746	0.00101072	0.182816	0.45	0.31
giant	(0.444,0.464]	(0.316,0.337]	1544	0.000511852	0.114122	0.45	0.33
giant	(0.444,0.464]	(0.337,0.352]	1863	0.000782287	0.15136	0.45	0.34
giant	(0.444,0.464]	(0.352,0.371]	2650	5.3434e-05	0.0509972	0.45	0.36
giant	(0.444,0.464]	(0.371,0.388]	4359	0.000759004	0.148154	0.45	0.38
giant	(0.444,0.464]	(0.388,0.408]	7248	0.000431416	0.103045	0.45	0.4
giant	(0.444,0.464]	(0.408,0.427]	6347	0.000416055	0.10093	0.45	0.42
giant	(0.444,0.464]	(0.427,0.444]	8822	0.000232782	0.0756934	0.45	0.44
giant	(0.444,0.464]	(0.444,0.464]	11665	-1.98028e-06	0.0433667	0.45	0.45
giant	(0.444,0.464]	(0.464,0.483]	11005	-0.000343044	-0.00359783	0.45	0.47
giant	(0.444,0.464]	(0.483,0.5]	11245	-0.000644331	-0.045085	0.45	0.49
giant	(0.464,0.483]	(0.0459,0.0618]	2	0.0104	1.47572	0.47	0.05
giant	(0.464,0.483]	(0.0765,0.0899]	2	0.011	1.55834	0.47	0.08
giant	(0.464,0.483]	(0.185,0.202]	1	-0.0005	-0.0252107	0.47	0.19
giant	(0.464,0.483]	(0.23,0.25]	17	-0.000941176	-0.0859607	0.47	0.24
giant	(0.464,0.483]	(0.25,0.265]	56	0.00190714	0.306253	0.47	0.26
giant	(0.464,0.483]	(0.265,0.281]	87	0.000544828	0.118662	0.47	0.27
giant	(0.464,0.483]	(0.281,0.298]	213	0.000984038	0.179141	0.47	0.29
giant	(0.464,0.483]	(0.298,0.316]	500	0.0014648	0.245343	0.47	0.31
giant	(0.464,0.483]	(0.316,0.337]	1361	0.00161396	0.265882	0.47	0.33
giant	(0.464,0.483]	(0.337,0.352]	1801	0.00153937	0.25561	0.47	0.34
giant	(0.464,0.483]	(0.352,0.371]	2592	0.00091088	0.169068	0.47	0.36
giant	(0.464,0.483]	(0.371,0.388]	4619	0.00121446	0.210871	0.47	0.38
giant	(0.464,0.483]	(0.388,0.408]	9445	0.000592176	0.125182	0.47	0.4
giant	(0.464,0.483]	(0.408,0.427]	8090	0.000422608	0.101833	0.47	0.42
giant	(0.464,0.483]	(0.427,0.444]	11835	0.000241757	0.0769294	0.47	0.44
giant	(0.464,0.483]	(0.444,0.464]	16580	0.000201846	0.0714335	0.47	0.45
giant	(0.464,0.483]	(0.464,0.483]	16728	6.53216e-05	0.0526342	0.47	0.47
giant	(0.464,0.483]	(0.483,0.5]	18159	-0.00019598	0.0166529	0.47	0.49
giant	(0.483,0.5]	(0.0618,0.0765]	1	0.0091	1.29671	0.49	0.07
giant	(0.483,0.5]	(0.0899,0.101]	3	0.00906667	1.29212	0.49	0.1
giant	(0.483,0.5]	(0.143,0.157]	2	0.00985	1.39999	0.49	0.15
giant	(0.483,0.5]	(0.157,0.169]	1	0.0091	1.29671	0.49	0.16
giant	(0.483,0.5]	(0.202,0.219]	1	0.0055	0.80099	0.49	0.21
giant	(0.483,0.5]	(0.23,0.25]	5	-0.00328	-0.408017	0.49	0.24
giant	(0.483,0.5]	(0.25,0.265]	52	-0.000411538	-0.0130295	0.49	0.26
giant	(0.483,0.5]	(0.265,0.281]	47	-0.00186596	-0.213303	0.49	0.27
giant	(0.483,0.5]	(0.281,0.298]	73	0.00290137	0.443158	0.49	0.29
giant	(0.483,0.5]	(0.298,0.316]	263	0.00233802	0.365585	0.49	0.31
giant	(0.483,0.5]	(0.316,0.337]	739	0.000961705	0.176066	0.49	0.33
giant	(0.483,0.5]	(0.337,0.352]	1084	0.000414945	0.100777	0.49	0.34
giant	(0.483,0.5]	(0.352,0.371]	1454	0.000679505	0.137207	0.49	0.36
giant	(0.483,0.5]	(0.371,0.388]	2578	0.00140314	0.236852	0.49	0.38
giant	(0.483,0.5]	(0.388,0.408]	5216	0.000824022	0.157107	0.49	0.4
giant	(0.483,0.5]	(0.408,0.427]	5205	0.000816292	0.156043	0.49	0.42
giant	(0.483,0.5]	(0.427,0.444]	7521	0.000453623	0.106103	0.49	0.44
giant	(0.483,0.5]	(0.444,0.464]	10907	0.000618502	0.128807	0.49	0.45
giant	(0.483,0.5]	(0.464,0.483]	11023	0.00032434	0.088301	0.49	0.47
giant	(0.483,0.5]	(0.483,0.5]	11499	-0.000145334	0.0236268	0.49	0.49
SDS	[0,0.0459]	[0,0.0459]	1887	0.327551	0.326265	0.02	0.02
SDS	[0,0.0459]	(0.0459,0.0618]	3753	-0.0552115	-0.051438	0.02	0.05
SDS	[0,0.0459]	(0.0618,0.0765]	7035	-0.205396	-0.199637	0.02	0.07
SDS	[0,0.0459]	(0.0765,0.0899]	3910	-0.351415	-0.343726	0.02	0.08
SDS	[0,0.0459]	(0.0899,0.101]	2971	-0.318552	-0.311297	0.02	0.1
SDS	[0,0.0459]	(0.101,0.112]	2732	-0.535009	-0.524893	0.02	0.11
SDS	[0,0.0459]	(0.112,0.129]	1294	-0.616167	-0.604979	0.02	0.12
SDS	[0,0.0459]	(0.129,0.143]	542	-0.70615	-0.693772	0.02	0.14
SDS	[0,0.0459]	(0.143,0.157]	211	-0.942083	-0.926586	0.02	0.15
SDS	[0,0.0459]	(0.157,0.169]	105	-0.787622	-0.774167	0.02	0.16
SDS	[0,0.0459]	(0.169,0.185]	42	-0.554406	-0.544034	0.02	0.18
SDS	[0,0.0459]	(0.185,0.202]	17	-1.77723	-1.75069	0.02	0.19
SDS	[0,0.0459]	(0.202,0.219]	49	-0.80383	-0.790161	0.02	0.21
SDS	[0,0.0459]	(0.219,0.23]	8	-3.64712	-3.59587	0.02	0.22
SDS	(0.0459,0.0618]	[0,0.0459]	5044	0.335689	0.334295	0.05	0.02
SDS	(0.0459,0.0618]	(0.0459,0.0618]	12419	0.107532	0.109154	0.05	0.05
SDS	(0.0459,0.0618]	(0.0618,0.0765]	12543	-0.118035	-0.113431	0.05	0.07
SDS	(0.0459,0.0618]	(0.0765,0.0899]	6632	-0.177007	-0.171624	0.05	0.08
SDS	(0.0459,0.0618]	(0.0899,0.101]	5501	-0.337426	-0.329922	0.05	0.1
SDS	(0.0459,0.0618]	(0.101,0.112]	5838	-0.441532	-0.432651	0.05	0.11
SDS	(0.0459,0.0618]	(0.112,0.129]	3221	-0.547092	-0.536816	0.05	0.12
SDS	(0.0459,0.0618]	(0.129,0.143]	1872	-0.776548	-0.763239	0.05	0.14
SDS	(0.0459,0.0618]	(0.143,0.157]	754	-0.641897	-0.630368	0.05	0.15
SDS	(0.0459,0.0618]	(0.157,0.169]	448	-0.742644	-0.729784	0.05	0.16
SDS	(0.0459,0.0618]	(0.169,0.185]	252	-0.785446	-0.77202	0.05	0.18
SDS	(0.0459,0.0618]	(0.185,0.202]	107	-1.07111	-1.05391	0.05	0.19
SDS	(0.0459,0.0618]	(0.202,0.219]	28	-0.681602	-0.669548	0.05	0.21
SDS	(0.0459,0.0618]	(0.219,0.23]	21	-1.22999	-1.21069	0.05	0.22
SDS	(0.0459,0.0618]	(0.23,0.25]	12	-2.26503	-2.23204	0.05	0.24
SDS	(0.0459,0.0618]	(0.281,0.298]	1	-4.28175	-4.2221	0.05	0.29
SDS	(0.0459,0.0618]	(0.298,0.316]	1	-4.69447	-4.62937	0.05	0.31
SDS	(0.0618,0.0765]	[0,0.0459]	6296	0.32305	0.321823	0.07	0.02
SDS	(0.0618,0.0765]	(0.0459,0.0618]	8926	0.166383	0.167227	0.07	0.05
SDS	(0.0618,0.0765]	(0.0618,0.0765]	9930	0.0236632	0.026394	0.07	0.07
SDS	(0.0618,0.0765]	(0.0765,0.0899]	5946	-0.17793	-0.172534	0.07	0.08
SDS	(0.0618,0.0765]	(0.0899,0.101]	5265	-0.290256	-0.283375	0.07	0.1
SDS	(0.0618,0.0765]	(0.101,0.112]	5874	-0.288072	-0.28122	0.07	0.11
SDS	(0.0618,0.0765]	(0.112,0.129]	3813	-0.458207	-0.449106	0.07	0.12
SDS	(0.0618,0.0765]	(0.129,0.143]	2351	-0.530175	-0.520123	0.07	0.14
SDS	(0.0618,0.0765]	(0.143,0.157]	997	-0.559081	-0.548647	0.07	0.15
SDS	(0.0618,0.0765]	(0.157,0.169]	667	-0.705016	-0.692653	0.07	0.16
SDS	(0.0618,0.0765]	(0.169,0.185]	413	-0.700215	-0.687915	0.07	0.18
SDS	(0.0618,0.0765]	(0.185,0.202]	205	-0.639125	-0.627633	0.07	0.19
SDS	(0.0618,0.0765]	(0.202,0.219]	104	-1.11879	-1.10096	0.07	0.21
SDS	(0.0618,0.0765]	(0.219,0.23]	17	-1.03791	-1.02114	0.07	0.22
SDS	(0.0618,0.0765]	(0.23,0.25]	7	-1.97142	-1.94232	0.07	0.24
SDS	(0.0618,0.0765]	(0.25,0.265]	5	-3.31261	-3.26577	0.07	0.26
SDS	(0.0618,0.0765]	(0.265,0.281]	4	-4.48874	-4.42636	0.07	0.27
SDS	(0.0765,0.0899]	[0,0.0459]	7987	0.504414	0.50079	0.08	0.02
SDS	(0.0765,0.0899]	(0.0459,0.0618]	9994	0.258927	0.258548	0.08	0.05
SDS	(0.0765,0.0899]	(0.0618,0.0765]	13203	0.160446	0.161368	0.08	0.07
SDS	(0.0765,0.0899]	(0.0765,0.0899]	8960	-0.0468337	-0.0431709	0.08	0.08
SDS	(0.0765,0.0899]	(0.0899,0.101]	7994	-0.132812	-0.128013	0.08	0.1
SDS	(0.0765,0.0899]	(0.101,0.112]	10368	-0.168455	-0.163185	0.08	0.11
SDS	(0.0765,0.0899]	(0.112,0.129]	8013	-0.315962	-0.308741	0.08	0.12
SDS	(0.0765,0.0899]	(0.129,0.143]	5344	-0.467234	-0.458014	0.08	0.14
SDS	(0.0765,0.0899]	(0.143,0.157]	2683	-0.439308	-0.430457	0.08	0.15
SDS	(0.0765,0.0899]	(0.157,0.169]	2307	-0.504035	-0.494328	0.08	0.16
SDS	(0.0765,0.0899]	(0.169,0.185]	1289	-0.606895	-0.595828	0.08	0.18
SDS	(0.0765,0.0899]	(0.185,0.202]	587	-0.815226	-0.801406	0.08	0.19
SDS	(0.0765,0.0899]	(0.202,0.219]	381	-1.20904	-1.19002	0.08	0.21
SDS	(0.0765,0.0899]	(0.219,0.23]	157	-1.02337	-1.0068	0.08	0.22
SDS	(0.0765,0.0899]	(0.23,0.25]	44	-1.83667	-1.80935	0.08	0.24
SDS	(0.0765,0.0899]	(0.25,0.265]	5	-2.00202	-1.97251	0.08	0.26
SDS	(0.0765,0.0899]	(0.265,0.281]	31	-3.69308	-3.64122	0.08	0.27
SDS	(0.0765,0.0899]	(0.281,0.298]	8	-1.66926	-1.64415	0.08	0.29
SDS	(0.0765,0.0899]	(0.298,0.316]	4	-2.69147	-2.65285	0.08	0.31
SDS	(0.0899,0.101]	[0,0.0459]	3829	0.581189	0.57655	0.1	0.02
SDS	(0.0899,0.101]	(0.0459,0.0618]	4972	0.361274	0.359542	0.1	0.05
SDS	(0.0899,0.101]	(0.0618,0.0765]	7800	0.22522	0.225287	0.1	0.07
SDS	(0.0899,0.101]	(0.0765,0.0899]	5891	0.0918011	0.0936312	0.1	0.08
SDS	(0.0899,0.101]	(0.0899,0.101]	6225	-0.028923	-0.025497	0.1	0.1
SDS	(0.0899,0.101]	(0.101,0.112]	9453	-0.111084	-0.106572	0.1	0.11
SDS	(0.0899,0.101]	(0.112,0.129]	8051	-0.212876	-0.207018	0.1	0.12
SDS	(0.0899,0.101]	(0.129,0.143]	5771	-0.294175	-0.287242	0.1	0.14
SDS	(0.0899,0.101]	(0.143,0.157]	3300	-0.445324	-0.436393	0.1	0.15
SDS	(0.0899,0.101]	(0.157,0.169]	3266	-0.520111	-0.510192	0.1	0.16
SDS	(0.0899,0.101]	(0.169,0.185]	1974	-0.532127	-0.522049	0.1	0.18
SDS	(0.0899,0.101]	(0.185,0.202]	1167	-0.476933	-0.467585	0.1	0.19
SDS	(0.0899,0.101]	(0.202,0.219]	601	-0.944398	-0.92887	0.1	0.21
SDS	(0.0899,0.101]	(0.219,0.23]	276	-0.688232	-0.676091	0.1	0.22
SDS	(0.0899,0.101]	(0.23,0.25]	213	-0.785159	-0.771736	0.1	0.24
SDS	(0.0899,0.101]	(0.25,0.265]	56	-0.768317	-0.755116	0.1	0.26
SDS	(0.0899,0.101]	(0.265,0.281]	87	-1.92504	-1.89655	0.1	0.27
SDS	(0.0899,0.101]	(0.281,0.298]	23	-1.59342	-1.56931	0.1	0.29
SDS	(0.0899,0.101]	(0.298,0.316]	11	-0.420347	-0.411747	0.1	0.31
SDS	(0.0899,0.101]	(0.352,0.371]	4	-2.46576	-2.43012	0.1	0.36
SDS	(0.0899,0.101]	(0.371,0.388]	2	-1.67843	-1.6532	0.1	0.38
SDS	(0.101,0.112]	[0,0.0459]	1964	0.565924	0.561487	0.11	0.02
SDS	(0.101,0.112]	(0.0459,0.0618]	3219	0.565517	0.561085	0.11	0.05
SDS	(0.101,0.112]	(0.0618,0.0765]	5344	0.285485	0.284754	0.11	0.07
SDS	(0.101,0.112]	(0.0765,0.0899]	4365	0.0929304	0.0947456	0.11	0.08
SDS	(0.101,0.112]	(0.0899,0.101]	5044	0.113299	0.114845	0.11	0.1
SDS	(0.101,0.112]	(0.101,0.112]	8274	-0.0062767	-0.00315008	0.11	0.11
SDS	(0.101,0.112]	(0.112,0.129]	7439	-0.0869304	-0.0827376	0.11	0.12
SDS	(0.101,0.112]	(0.129,0.143]	5939	-0.197553	-0.191898	0.11	0.14
SDS	(0.101,0.112]	(0.143,0.157]	3713	-0.325804	-0.318454	0.11	0.15
SDS	(0.101,0.112]	(0.157,0.169]	3634	-0.384303	-0.376179	0.11	0.16
SDS	(0.101,0.112]	(0.169,0.185]	2563	-0.45329	-0.444255	0.11	0.18
SDS	(0.101,0.112]	(0.185,0.202]	1477	-0.508416	-0.498651	0.11	0.19
SDS	(0.101,0.112]	(0.202,0.219]	915	-0.748713	-0.735772	0.11	0.21
SDS	(0.101,0.112]	(0.219,0.23]	529	-0.737646	-0.724851	0.11	0.22
SDS	(0.101,0.112]	(0.23,0.25]	288	-0.688389	-0.676245	0.11	0.24
SDS	(0.101,0.112]	(0.25,0.265]	93	-0.918928	-0.903737	0.11	0.26
SDS	(0.101,0.112]	(0.265,0.281]	40	-0.701885	-0.689563	0.11	0.27
SDS	(0.101,0.112]	(0.281,0.298]	24	-0.165473	-0.160242	0.11	0.29
SDS	(0.101,0.112]	(0.298,0.316]	5	-1.94855	-1.91975	0.11	0.31
SDS	(0.101,0.112]	(0.352,0.371]	1	-1.12817	-1.11021	0.11	0.36
SDS	(0.112,0.129]	[0,0.0459]	1215	0.731183	0.724561	0.12	0.02
SDS	(0.112,0.129]	(0.0459,0.0618]	2328	0.54	0.535906	0.12	0.05
SDS	(0.112,0.129]	(0.0618,0.0765]	4223	0.3561	0.354436	0.12	0.07
SDS	(0.112,0.129]	(0.0765,0.0899]	3973	0.267828	0.267331	0.12	0.08
SDS	(0.112,0.129]	(0.0899,0.101]	4921	0.275537	0.274938	0.12	0.1
SDS	(0.112,0.129]	(0.101,0.112]	7830	0.178143	0.178832	0.12	0.11
SDS	(0.112,0.129]	(0.112,0.129]	8515	-0.0556089	-0.0518301	0.12	0.12
SDS	(0.112,0.129]	(0.129,0.143]	6881	-0.109883	-0.105387	0.12	0.14
SDS	(0.112,0.129]	(0.143,0.157]	5269	-0.171402	-0.166092	0.12	0.15
SDS	(0.112,0.129]	(0.157,0.169]	5528	-0.237983	-0.231793	0.12	0.16
SDS	(0.112,0.129]	(0.169,0.185]	3671	-0.335501	-0.328022	0.12	0.18
SDS	(0.112,0.129]	(0.185,0.202]	2452	-0.487137	-0.477653	0.12	0.19
SDS	(0.112,0.129]	(0.202,0.219]	1486	-0.587205	-0.576399	0.12	0.21
SDS	(0.112,0.129]	(0.219,0.23]	874	-0.569176	-0.558608	0.12	0.22
SDS	(0.112,0.129]	(0.23,0.25]	597	-0.833804	-0.819738	0.12	0.24
SDS	(0.112,0.129]	(0.25,0.265]	187	-0.705111	-0.692747	0.12	0.26
SDS	(0.112,0.129]	(0.265,0.281]	88	-0.543789	-0.533557	0.12	0.27
SDS	(0.112,0.129]	(0.281,0.298]	38	-0.931043	-0.915692	0.12	0.29
SDS	(0.112,0.129]	(0.298,0.316]	17	-1.56332	-1.53961	0.12	0.31
SDS	(0.112,0.129]	(0.316,0.337]	3	-2.95261	-2.91054	0.12	0.33
SDS	(0.112,0.129]	(0.337,0.352]	9	-4.38836	-4.32731	0.12	0.34
SDS	(0.112,0.129]	(0.352,0.371]	5	-4.41538	-4.35397	0.12	0.36
SDS	(0.112,0.129]	(0.388,0.408]	4	-1.39086	-1.36943	0.12	0.4
SDS	(0.129,0.143]	[0,0.0459]	710	0.811019	0.803341	0.14	0.02
SDS	(0.129,0.143]	(0.0459,0.0618]	1754	0.664987	0.659241	0.14	0.05
SDS	(0.129,0.143]	(0.0618,0.0765]	3489	0.584125	0.579447	0.14	0.07
SDS	(0.129,0.143]	(0.0765,0.0899]	3681	0.428761	0.426137	0.14	0.08
SDS	(0.129,0.143]	(0.0899,0.101]	4780	0.287364	0.286609	0.14	0.1
SDS	(0.129,0.143]	(0.101,0.112]	8423	0.201907	0.202282	0.14	0.11
SDS	(0.129,0.143]	(0.112,0.129]	9233	0.0893867	0.0912487	0.14	0.12
SDS	(0.129,0.143]	(0.129,0.143]	9226	-0.0376055	-0.0340647	0.14	0.14
SDS	(0.129,0.143]	(0.143,0.157]	6608	-0.115925	-0.111349	0.14	0.15
SDS	(0.129,0.143]	(0.157,0.169]	7929	-0.162612	-0.157419	0.14	0.16
SDS	(0.129,0.143]	(0.169,0.185]	6093	-0.241387	-0.235152	0.14	0.18
SDS	(0.129,0.143]	(0.185,0.202]	4583	-0.373095	-0.365119	0.14	0.19
SDS	(0.129,0.143]	(0.202,0.219]	2998	-0.49454	-0.484959	0.14	0.21
SDS	(0.129,0.143]	(0.219,0.23]	2048	-0.585414	-0.574631	0.14	0.22
SDS	(0.129,0.143]	(0.23,0.25]	1630	-0.544715	-0.534471	0.14	0.24
SDS	(0.129,0.143]	(0.25,0.265]	569	-0.656659	-0.644935	0.14	0.26
SDS	(0.129,0.143]	(0.265,0.281]	418	-0.68024	-0.668205	0.14	0.27
SDS	(0.129,0.143]	(0.281,0.298]	158	-0.862199	-0.847758	0.14	0.29
SDS	(0.129,0.143]	(0.298,0.316]	94	-0.794477	-0.780931	0.14	0.31
SDS	(0.129,0.143]	(0.316,0.337]	49	-1.72128	-1.69549	0.14	0.33
SDS	(0.129,0.143]	(0.337,0.352]	42	-4.14571	-4.08787	0.14	0.34
SDS	(0.129,0.143]	(0.352,0.371]	1	0.646936	0.641428	0.14	0.36
SDS	(0.129,0.143]	(0.371,0.388]	11	-1.97881	-1.9496	0.14	0.38
SDS	(0.129,0.143]	(0.388,0.408]	7	-5.32295	-5.24954	0.14	0.4
SDS	(0.129,0.143]	(0.408,0.427]	1	-5.9777	-5.89564	0.14	0.42
SDS	(0.143,0.157]	[0,0.0459]	200	0.888276	0.879578	0.15	0.02
SDS	(0.143,0.157]	(0.0459,0.0618]	1005	0.600243	0.595352	0.15	0.05
SDS	(0.143,0.157]	(0.0618,0.0765]	1936	0.64034	0.634919	0.15	0.07
SDS	(0.143,0.157]	(0.0765,0.0899]	2284	0.501738	0.498149	0.15	0.08
SDS	(0.143,0.157]	(0.0899,0.101]	3420	0.386817	0.384747	0.15	0.1
SDS	(0.143,0.157]	(0.101,0.112]	6471	0.315948	0.314815	0.15	0.11
SDS	(0.143,0.157]	(0.112,0.129]	8387	0.215524	0.215719	0.15	0.12
SDS	(0.143,0.157]	(0.129,0.143]	8469	0.132144	0.133441	0.15	0.14
SDS	(0.143,0.157]	(0.143,0.157]	7125	-0.013045	-0.00982895	0.15	0.15
SDS	(0.143,0.157]	(0.157,0.169]	8985	-0.0990323	-0.0946795	0.15	0.16
SDS	(0.143,0.157]	(0.169,0.185]	7889	-0.180523	-0.175093	0.15	0.18
SDS	(0.143,0.157]	(0.185,0.202]	6710	-0.323907	-0.316582	0.15	0.19
SDS	(0.143,0.157]	(0.202,0.219]	5004	-0.408187	-0.399747	0.15	0.21
SDS	(0.143,0.157]	(0.219,0.23]	3672	-0.46736	-0.458138	0.15	0.22
SDS	(0.143,0.157]	(0.23,0.25]	2852	-0.57813	-0.567444	0.15	0.24
SDS	(0.143,0.157]	(0.25,0.265]	1352	-0.65115	-0.639499	0.15	0.26
SDS	(0.143,0.157]	(0.265,0.281]	715	-0.834937	-0.820856	0.15	0.27
SDS	(0.143,0.157]	(0.281,0.298]	453	-0.7712	-0.757962	0.15	0.29
SDS	(0.143,0.157]	(0.298,0.316]	176	-0.823633	-0.809702	0.15	0.31
SDS	(0.143,0.157]	(0.316,0.337]	78	-1.24824	-1.2287	0.15	0.33
SDS	(0.143,0.157]	(0.337,0.352]	27	-1.54468	-1.52122	0.15	0.34
SDS	(0.143,0.157]	(0.352,0.371]	19	-3.47246	-3.42351	0.15	0.36
SDS	(0.143,0.157]	(0.371,0.388]	13	-1.3952	-1.37372	0.15	0.38
SDS	(0.143,0.157]	(0.388,0.408]	14	-3.53076	-3.48104	0.15	0.4
SDS	(0.143,0.157]	(0.408,0.427]	26	-5.54214	-5.46583	0.15	0.42
SDS	(0.143,0.157]	(0.427,0.444]	13	-6.05752	-5.97441	0.15	0.44
SDS	(0.143,0.157]	(0.444,0.464]	5	-6.30532	-6.21892	0.15	0.45
SDS	(0.157,0.169]	[0,0.0459]	75	0.999278	0.989112	0.16	0.02
SDS	(0.157,0.169]	(0.0459,0.0618]	358	1.14654	1.13443	0.16	0.05
SDS	(0.157,0.169]	(0.0618,0.0765]	709	0.847709	0.839546	0.16	0.07
SDS	(0.157,0.169]	(0.0765,0.0899]	929	0.692602	0.68649	0.16	0.08
SDS	(0.157,0.169]	(0.0899,0.101]	1441	0.480735	0.477423	0.16	0.1
SDS	(0.157,0.169]	(0.101,0.112]	3037	0.423345	0.420793	0.16	0.11
SDS	(0.157,0.169]	(0.112,0.129]	4273	0.282175	0.281489	0.16	0.12
SDS	(0.157,0.169]	(0.129,0.143]	4887	0.164735	0.165601	0.16	0.14
SDS	(0.157,0.169]	(0.143,0.157]	4406	0.103511	0.105186	0.16	0.15
SDS	(0.157,0.169]	(0.157,0.169]	6306	-0.0688217	-0.0648683	0.16	0.16
SDS	(0.157,0.169]	(0.169,0.185]	5796	-0.0622714	-0.0584046	0.16	0.18
SDS	(0.157,0.169]	(0.185,0.202]	5330	-0.191562	-0.185986	0.16	0.19
SDS	(0.157,0.169]	(0.202,0.219]	3981	-0.292119	-0.285214	0.16	0.21
SDS	(0.157,0.169]	(0.219,0.23]	3240	-0.446492	-0.437546	0.16	0.22
SDS	(0.157,0.169]	(0.23,0.25]	2917	-0.372642	-0.364673	0.16	0.24
SDS	(0.157,0.169]	(0.25,0.265]	1351	-0.437728	-0.428898	0.16	0.26
SDS	(0.157,0.169]	(0.265,0.281]	814	-0.650329	-0.638689	0.16	0.27
SDS	(0.157,0.169]	(0.281,0.298]	576	-0.628848	-0.617491	0.16	0.29
SDS	(0.157,0.169]	(0.298,0.316]	383	-0.850131	-0.835849	0.16	0.31
SDS	(0.157,0.169]	(0.316,0.337]	126	-0.860598	-0.846178	0.16	0.33
SDS	(0.157,0.169]	(0.337,0.352]	50	-1.12567	-1.10774	0.16	0.34
SDS	(0.157,0.169]	(0.352,0.371]	25	-1.35213	-1.33121	0.16	0.36
SDS	(0.157,0.169]	(0.371,0.388]	10	-0.674933	-0.662968	0.16	0.38
SDS	(0.157,0.169]	(0.388,0.408]	6	-1.19909	-1.1802	0.16	0.4
SDS	(0.157,0.169]	(0.408,0.427]	1	-4.46609	-4.40401	0.16	0.42
SDS	(0.157,0.169]	(0.427,0.444]	2	-4.575	-4.51148	0.16	0.44
SDS	(0.157,0.169]	(0.444,0.464]	5	-4.58363	-4.51999	0.16	0.45
SDS	(0.157,0.169]	(0.464,0.483]	10	-5.49905	-5.42331	0.16	0.47
SDS	(0.157,0.169]	(0.483,0.5]	4	-6.35414	-6.2671	0.16	0.49
SDS	(0.169,0.185]	[0,0.0459]	44	0.737016	0.730317	0.18	0.02
SDS	(0.169,0.185]	(0.0459,0.0618]	228	0.73064	0.724025	0.18	0.05
SDS	(0.169,0.185]	(0.0618,0.0765]	587	0.914222	0.90518	0.18	0.07
SDS	(0.169,0.185]	(0.0765,0.0899]	777	0.662794	0.657076	0.18	0.08
SDS	(0.169,0.185]	(0.0899,0.101]	1377	0.646172	0.640674	0.18	0.1
SDS	(0.169,0.185]	(0.101,0.112]	2729	0.569949	0.565459	0.18	0.11
SDS	(0.169,0.185]	(0.112,0.129]	4430	0.428397	0.425778	0.18	0.12
SDS	(0.169,0.185]	(0.129,0.143]	6015	0.303049	0.302087	0.18	0.14
SDS	(0.169,0.185]	(0.143,0.157]	5493	0.16708	0.167915	0.18	0.15
SDS	(0.169,0.185]	(0.157,0.169]	8667	0.114095	0.115631	0.18	0.16
SDS	(0.169,0.185]	(0.169,0.185]	8735	-0.0477331	-0.0440585	0.18	0.18
SDS	(0.169,0.185]	(0.185,0.202]	7974	-0.0476135	-0.0439405	0.18	0.19
SDS	(0.169,0.185]	(0.202,0.219]	7500	-0.22428	-0.218272	0.18	0.21
SDS	(0.169,0.185]	(0.219,0.23]	6053	-0.247911	-0.24159	0.18	0.22
SDS	(0.169,0.185]	(0.23,0.25]	5901	-0.310213	-0.303068	0.18	0.24
SDS	(0.169,0.185]	(0.25,0.265]	2988	-0.483711	-0.474273	0.18	0.26
SDS	(0.169,0.185]	(0.265,0.281]	2164	-0.569849	-0.559272	0.18	0.27
SDS	(0.169,0.185]	(0.281,0.298]	1242	-0.672037	-0.660109	0.18	0.29
SDS	(0.169,0.185]	(0.298,0.316]	944	-0.706024	-0.693648	0.18	0.31
SDS	(0.169,0.185]	(0.316,0.337]	394	-0.848001	-0.833748	0.18	0.33
SDS	(0.169,0.185]	(0.337,0.352]	151	-0.969812	-0.953949	0.18	0.34
SDS	(0.169,0.185]	(0.352,0.371]	42	-1.24065	-1.22121	0.18	0.36
SDS	(0.169,0.185]	(0.371,0.388]	34	-1.24569	-1.22618	0.18	0.38
SDS	(0.169,0.185]	(0.388,0.408]	37	-2.72425	-2.6852	0.18	0.4
SDS	(0.169,0.185]	(0.408,0.427]	4	-1.33753	-1.31681	0.18	0.42
SDS	(0.169,0.185]	(0.427,0.444]	17	-4.13726	-4.07953	0.18	0.44
SDS	(0.169,0.185]	(0.444,0.464]	8	-4.34592	-4.28542	0.18	0.45
SDS	(0.185,0.202]	[0,0.0459]	4	-0.376465	-0.368445	0.19	0.02
SDS	(0.185,0.202]	(0.0459,0.0618]	76	0.473754	0.470535	0.19	0.05
SDS	(0.185,0.202]	(0.0618,0.0765]	211	0.985006	0.975029	0.19	0.07
SDS	(0.185,0.202]	(0.0765,0.0899]	267	0.977933	0.968049	0.19	0.08
SDS	(0.185,0.202]	(0.0899,0.101]	653	0.65258	0.646997	0.19	0.1
SDS	(0.185,0.202]	(0.101,0.112]	1351	0.574352	0.569803	0.19	0.11
SDS	(0.185,0.202]	(0.112,0.129]	2221	0.51537	0.511601	0.19	0.12
SDS	(0.185,0.202]	(0.129,0.143]	3103	0.357704	0.356019	0.19	0.14
SDS	(0.185,0.202]	(0.143,0.157]	3266	0.316853	0.315708	0.19	0.15
SDS	(0.185,0.202]	(0.157,0.169]	5669	0.172728	0.173488	0.19	0.16
SDS	(0.185,0.202]	(0.169,0.185]	5757	0.0881779	0.0900559	0.19	0.18
SDS	(0.185,0.202]	(0.185,0.202]	5990	0.0385841	0.0411177	0.19	0.19
SDS	(0.185,0.202]	(0.202,0.219]	6051	-0.148279	-0.143275	0.19	0.21
SDS	(0.185,0.202]	(0.219,0.23]	5163	-0.170853	-0.165551	0.19	0.22
SDS	(0.185,0.202]	(0.23,0.25]	5426	-0.332968	-0.325523	0.19	0.24
SDS	(0.185,0.202]	(0.25,0.265]	3124	-0.292961	-0.286045	0.19	0.26
SDS	(0.185,0.202]	(0.265,0.281]	2162	-0.369054	-0.361132	0.19	0.27
SDS	(0.185,0.202]	(0.281,0.298]	1409	-0.475191	-0.465866	0.19	0.29
SDS	(0.185,0.202]	(0.298,0.316]	1157	-0.588097	-0.577279	0.19	0.31
SDS	(0.185,0.202]	(0.316,0.337]	592	-0.755838	-0.742803	0.19	0.33
SDS	(0.185,0.202]	(0.337,0.352]	197	-0.951049	-0.935434	0.19	0.34
SDS	(0.185,0.202]	(0.352,0.371]	126	-0.845713	-0.831489	0.19	0.36
SDS	(0.185,0.202]	(0.371,0.388]	71	-0.941823	-0.926329	0.19	0.38
SDS	(0.185,0.202]	(0.388,0.408]	33	-0.808431	-0.794701	0.19	0.4
SDS	(0.185,0.202]	(0.408,0.427]	12	-2.69416	-2.6555	0.19	0.42
SDS	(0.185,0.202]	(0.427,0.444]	7	-1.7268	-1.70093	0.19	0.44
SDS	(0.185,0.202]	(0.444,0.464]	5	-3.41394	-3.36577	0.19	0.45
SDS	(0.185,0.202]	(0.464,0.483]	2	-5.93603	-5.85452	0.19	0.47
SDS	(0.202,0.219]	[0,0.0459]	11	2.98164	2.94527	0.21	0.02
SDS	(0.202,0.219]	(0.0459,0.0618]	22	0.85207	0.84385	0.21	0.05
SDS	(0.202,0.219]	(0.0618,0.0765]	172	0.560105	0.555745	0.21	0.07
SDS	(0.202,0.219]	(0.0765,0.0899]	302	0.744664	0.737864	0.21	0.08
SDS	(0.202,0.219]	(0.0899,0.101]	415	0.614065	0.608991	0.21	0.1
SDS	(0.202,0.219]	(0.101,0.112]	1061	0.631158	0.625858	0.21	0.11
SDS	(0.202,0.219]	(0.112,0.129]	2021	0.562824	0.558427	0.21	0.12
SDS	(0.202,0.219]	(0.129,0.143]	2912	0.557127	0.552806	0.21	0.14
SDS	(0.202,0.219]	(0.143,0.157]	3479	0.386991	0.384919	0.21	0.15
SDS	(0.202,0.219]	(0.157,0.169]	5695	0.282816	0.282121	0.21	0.16
SDS	(0.202,0.219]	(0.169,0.185]	6905	0.239832	0.239705	0.21	0.18
SDS	(0.202,0.219]	(0.185,0.202]	7789	0.135276	0.136531	0.21	0.19
SDS	(0.202,0.219]	(0.202,0.219]	7517	0.0253595	0.0280679	0.21	0.21
SDS	(0.202,0.219]	(0.219,0.23]	7325	-0.0619748	-0.0581119	0.21	0.22
SDS	(0.202,0.219]	(0.23,0.25]	8323	-0.151829	-0.146779	0.21	0.24
SDS	(0.202,0.219]	(0.25,0.265]	5371	-0.287409	-0.280566	0.21	0.26
SDS	(0.202,0.219]	(0.265,0.281]	3838	-0.36444	-0.356578	0.21	0.27
SDS	(0.202,0.219]	(0.281,0.298]	2867	-0.431728	-0.422978	0.21	0.29
SDS	(0.202,0.219]	(0.298,0.316]	2352	-0.463578	-0.454406	0.21	0.31
SDS	(0.202,0.219]	(0.316,0.337]	1317	-0.812779	-0.798991	0.21	0.33
SDS	(0.202,0.219]	(0.337,0.352]	582	-0.915173	-0.900032	0.21	0.34
SDS	(0.202,0.219]	(0.352,0.371]	347	-0.781544	-0.768169	0.21	0.36
SDS	(0.202,0.219]	(0.371,0.388]	215	-1.0607	-1.04363	0.21	0.38
SDS	(0.202,0.219]	(0.388,0.408]	177	-0.896381	-0.881488	0.21	0.4
SDS	(0.202,0.219]	(0.408,0.427]	24	-3.28728	-3.24078	0.21	0.42
SDS	(0.202,0.219]	(0.427,0.444]	44	-1.00509	-0.988758	0.21	0.44
SDS	(0.202,0.219]	(0.444,0.464]	9	-1.90507	-1.87685	0.21	0.45
SDS	(0.202,0.219]	(0.464,0.483]	2	-3.39558	-3.34765	0.21	0.47
SDS	(0.219,0.23]	[0,0.0459]	4	3.80991	3.76259	0.22	0.02
SDS	(0.219,0.23]	(0.0459,0.0618]	4	2.93522	2.89946	0.22	0.05
SDS	(0.219,0.23]	(0.0618,0.0765]	41	1.15115	1.13898	0.22	0.07
SDS	(0.219,0.23]	(0.0765,0.0899]	66	0.925562	0.916371	0.22	0.08
SDS	(0.219,0.23]	(0.0899,0.101]	116	0.760901	0.753886	0.22	0.1
SDS	(0.219,0.23]	(0.101,0.112]	730	0.992369	0.982294	0.22	0.11
SDS	(0.219,0.23]	(0.112,0.129]	1152	0.603813	0.598875	0.22	0.12
SDS	(0.219,0.23]	(0.129,0.143]	1762	0.525531	0.521628	0.22	0.14
SDS	(0.219,0.23]	(0.143,0.157]	2100	0.558629	0.554288	0.22	0.15
SDS	(0.219,0.23]	(0.157,0.169]	3732	0.354333	0.352692	0.22	0.16
SDS	(0.219,0.23]	(0.169,0.185]	5242	0.305149	0.304159	0.22	0.18
SDS	(0.219,0.23]	(0.185,0.202]	6363	0.157289	0.158254	0.22	0.19
SDS	(0.219,0.23]	(0.202,0.219]	6506	0.0830551	0.0850008	0.22	0.21
SDS	(0.219,0.23]	(0.219,0.23]	6591	0.0118872	0.0147737	0.22	0.22
SDS	(0.219,0.23]	(0.23,0.25]	8345	-0.0772285	-0.0731639	0.22	0.24
SDS	(0.219,0.23]	(0.25,0.265]	5363	-0.206887	-0.201109	0.22	0.26
SDS	(0.219,0.23]	(0.265,0.281]	4446	-0.205942	-0.200176	0.22	0.27
SDS	(0.219,0.23]	(0.281,0.298]	3212	-0.341006	-0.333455	0.22	0.29
SDS	(0.219,0.23]	(0.298,0.316]	3254	-0.433417	-0.424644	0.22	0.31
SDS	(0.219,0.23]	(0.316,0.337]	1744	-0.590399	-0.579551	0.22	0.33
SDS	(0.219,0.23]	(0.337,0.352]	802	-0.636334	-0.624878	0.22	0.34
SDS	(0.219,0.23]	(0.352,0.371]	413	-0.689397	-0.67724	0.22	0.36
SDS	(0.219,0.23]	(0.371,0.388]	300	-0.86593	-0.85144	0.22	0.38
SDS	(0.219,0.23]	(0.388,0.408]	247	-0.693111	-0.680906	0.22	0.4
SDS	(0.219,0.23]	(0.408,0.427]	50	-1.33332	-1.31265	0.22	0.42
SDS	(0.219,0.23]	(0.427,0.444]	49	-2.06816	-2.03778	0.22	0.44
SDS	(0.219,0.23]	(0.444,0.464]	23	-2.20421	-2.17203	0.22	0.45
SDS	(0.219,0.23]	(0.464,0.483]	6	-1.38806	-1.36667	0.22	0.47
SDS	(0.23,0.25]	(0.0459,0.0618]	24	4.10024	4.04908	0.24	0.05
SDS	(0.23,0.25]	(0.0618,0.0765]	36	1.88872	1.8668	0.24	0.07
SDS	(0.23,0.25]	(0.0765,0.0899]	30	1.54062	1.52329	0.24	0.08
SDS	(0.23,0.25]	(0.0899,0.101]	63	0.998584	0.988427	0.24	0.1
SDS	(0.23,0.25]	(0.101,0.112]	298	1.00815	0.997866	0.24	0.11
SDS	(0.23,0.25]	(0.112,0.129]	569	0.606578	0.601603	0.24	0.12
SDS	(0.23,0.25]	(0.129,0.143]	1062	0.637869	0.63248	0.24	0.14
SDS	(0.23,0.25]	(0.143,0.157]	1374	0.510582	0.506877	0.24	0.15
SDS	(0.23,0.25]	(0.157,0.169]	2643	0.500629	0.497055	0.24	0.16
SDS	(0.23,0.25]	(0.169,0.185]	3965	0.360569	0.358846	0.24	0.18
SDS	(0.23,0.25]	(0.185,0.202]	5250	0.236841	0.236753	0.24	0.19
SDS	(0.23,0.25]	(0.202,0.219]	6324	0.237926	0.237824	0.24	0.21
SDS	(0.23,0.25]	(0.219,0.23]	6745	0.134681	0.135944	0.24	0.22
SDS	(0.23,0.25]	(0.23,0.25]	9499	-0.00206478	0.00100616	0.24	0.24
SDS	(0.23,0.25]	(0.25,0.265]	7121	-0.0886075	-0.0843926	0.24	0.26
SDS	(0.23,0.25]	(0.265,0.281]	5625	-0.181134	-0.175696	0.24	0.27
SDS	(0.23,0.25]	(0.281,0.298]	5087	-0.236391	-0.230222	0.24	0.29
SDS	(0.23,0.25]	(0.298,0.316]	4841	-0.408116	-0.399677	0.24	0.31
SDS	(0.23,0.25]	(0.316,0.337]	3128	-0.570071	-0.559492	0.24	0.33
SDS	(0.23,0.25]	(0.337,0.352]	1684	-0.569507	-0.558935	0.24	0.34
SDS	(0.23,0.25]	(0.352,0.371]	1173	-0.6498	-0.638167	0.24	0.36
SDS	(0.23,0.25]	(0.371,0.388]	757	-0.807807	-0.794085	0.24	0.38
SDS	(0.23,0.25]	(0.388,0.408]	427	-0.836354	-0.822254	0.24	0.4
SDS	(0.23,0.25]	(0.408,0.427]	158	-1.03685	-1.0201	0.24	0.42
SDS	(0.23,0.25]	(0.427,0.444]	66	-0.863627	-0.849167	0.24	0.44
SDS	(0.23,0.25]	(0.444,0.464]	24	-1.65813	-1.63317	0.24	0.45
SDS	(0.23,0.25]	(0.464,0.483]	7	-1.40986	-1.38818	0.24	0.47
SDS	(0.23,0.25]	(0.483,0.5]	8	-1.18146	-1.1628	0.24	0.49
SDS	(0.25,0.265]	[0,0.0459]	1	3.99975	3.94992	0.26	0.02
SDS	(0.25,0.265]	(0.0459,0.0618]	14	4.0716	4.02082	0.26	0.05
SDS	(0.25,0.265]	(0.0618,0.0765]	5	0.65037	0.644817	0.26	0.07
SDS	(0.25,0.265]	(0.0765,0.0899]	23	1.74562	1.72559	0.26	0.08
SDS	(0.25,0.265]	(0.0899,0.101]	35	1.64915	1.63039	0.26	0.1
SDS	(0.25,0.265]	(0.101,0.112]	161	1.28825	1.27426	0.26	0.11
SDS	(0.25,0.265]	(0.112,0.129]	372	0.818629	0.810851	0.26	0.12
SDS	(0.25,0.265]	(0.129,0.143]	543	0.733237	0.726588	0.26	0.14
SDS	(0.25,0.265]	(0.143,0.157]	894	0.557996	0.553663	0.26	0.15
SDS	(0.25,0.265]	(0.157,0.169]	1807	0.588857	0.584116	0.26	0.16
SDS	(0.25,0.265]	(0.169,0.185]	2586	0.540454	0.536353	0.26	0.18
SDS	(0.25,0.265]	(0.185,0.202]	3674	0.271895	0.271345	0.26	0.19
SDS	(0.25,0.265]	(0.202,0.219]	4855	0.255941	0.255602	0.26	0.21
SDS	(0.25,0.265]	(0.219,0.23]	6116	0.220759	0.220885	0.26	0.22
SDS	(0.25,0.265]	(0.23,0.25]	9287	0.120097	0.121553	0.26	0.24
SDS	(0.25,0.265]	(0.25,0.265]	6924	-0.011474	-0.00827867	0.26	0.26
SDS	(0.25,0.265]	(0.265,0.281]	6100	-0.12819	-0.123452	0.26	0.27
SDS	(0.25,0.265]	(0.281,0.298]	5368	-0.225622	-0.219596	0.26	0.29
SDS	(0.25,0.265]	(0.298,0.316]	6399	-0.295136	-0.28819	0.26	0.31
SDS	(0.25,0.265]	(0.316,0.337]	4728	-0.40461	-0.396218	0.26	0.33
SDS	(0.25,0.265]	(0.337,0.352]	2394	-0.440724	-0.431855	0.26	0.34
SDS	(0.25,0.265]	(0.352,0.371]	1886	-0.48504	-0.475585	0.26	0.36
SDS	(0.25,0.265]	(0.371,0.388]	1156	-0.614379	-0.603214	0.26	0.38
SDS	(0.25,0.265]	(0.388,0.408]	899	-0.550898	-0.540572	0.26	0.4
SDS	(0.25,0.265]	(0.408,0.427]	310	-0.674583	-0.662622	0.26	0.42
SDS	(0.25,0.265]	(0.427,0.444]	190	-0.861078	-0.846652	0.26	0.44
SDS	(0.25,0.265]	(0.444,0.464]	113	-0.920866	-0.90565	0.26	0.45
SDS	(0.25,0.265]	(0.464,0.483]	34	-1.46494	-1.44253	0.26	0.47
SDS	(0.25,0.265]	(0.483,0.5]	16	-2.57629	-2.53919	0.26	0.49
SDS	(0.265,0.281]	(0.0618,0.0765]	2	2.60017	2.56884	0.27	0.07
SDS	(0.265,0.281]	(0.0765,0.0899]	4	0.91788	0.90879	0.27	0.08
SDS	(0.265,0.281]	(0.0899,0.101]	9	1.5876	1.56966	0.27	0.1
SDS	(0.265,0.281]	(0.101,0.112]	48	1.6595	1.6406	0.27	0.11
SDS	(0.265,0.281]	(0.112,0.129]	121	0.641689	0.63625	0.27	0.12
SDS	(0.265,0.281]	(0.129,0.143]	287	0.719681	0.713211	0.27	0.14
SDS	(0.265,0.281]	(0.143,0.157]	489	0.683894	0.677897	0.27	0.15
SDS	(0.265,0.281]	(0.157,0.169]	1163	0.606426	0.601453	0.27	0.16
SDS	(0.265,0.281]	(0.169,0.185]	1772	0.550818	0.54658	0.27	0.18
SDS	(0.265,0.281]	(0.185,0.202]	2613	0.522613	0.518749	0.27	0.19
SDS	(0.265,0.281]	(0.202,0.219]	3583	0.368343	0.366517	0.27	0.21
SDS	(0.265,0.281]	(0.219,0.23]	5195	0.335308	0.333919	0.27	0.22
SDS	(0.265,0.281]	(0.23,0.25]	7643	0.179608	0.180278	0.27	0.24
SDS	(0.265,0.281]	(0.25,0.265]	6363	0.0300836	0.0327296	0.27	0.26
SDS	(0.265,0.281]	(0.265,0.281]	6568	-0.0582942	-0.05448	0.27	0.27
SDS	(0.265,0.281]	(0.281,0.298]	6055	-0.0880631	-0.0838554	0.27	0.29
SDS	(0.265,0.281]	(0.298,0.316]	7031	-0.153603	-0.148529	0.27	0.31
SDS	(0.265,0.281]	(0.316,0.337]	5831	-0.226666	-0.220626	0.27	0.33
SDS	(0.265,0.281]	(0.337,0.352]	3189	-0.278724	-0.271995	0.27	0.34
SDS	(0.265,0.281]	(0.352,0.371]	2199	-0.521069	-0.511137	0.27	0.36
SDS	(0.265,0.281]	(0.371,0.388]	1691	-0.463055	-0.45389	0.27	0.38
SDS	(0.265,0.281]	(0.388,0.408]	1520	-0.564111	-0.55361	0.27	0.4
SDS	(0.265,0.281]	(0.408,0.427]	578	-0.496817	-0.487206	0.27	0.42
SDS	(0.265,0.281]	(0.427,0.444]	339	-0.846343	-0.832111	0.27	0.44
SDS	(0.265,0.281]	(0.444,0.464]	157	-0.839924	-0.825778	0.27	0.45
SDS	(0.265,0.281]	(0.464,0.483]	66	-1.20791	-1.1889	0.27	0.47
SDS	(0.265,0.281]	(0.483,0.5]	50	-1.29158	-1.27147	0.27	0.49
SDS	(0.281,0.298]	[0,0.0459]	1	3.65661	3.61131	0.29	0.02
SDS	(0.281,0.298]	(0.0459,0.0618]	1	4.4208	4.36541	0.29	0.05
SDS	(0.281,0.298]	(0.0899,0.101]	7	1.3439	1.32918	0.29	0.1
SDS	(0.281,0.298]	(0.101,0.112]	71	0.880407	0.871813	0.29	0.11
SDS	(0.281,0.298]	(0.112,0.129]	47	0.663114	0.657391	0.29	0.12
SDS	(0.281,0.298]	(0.129,0.143]	190	0.821714	0.813895	0.29	0.14
SDS	(0.281,0.298]	(0.143,0.157]	273	0.795495	0.788023	0.29	0.15
SDS	(0.281,0.298]	(0.157,0.169]	557	0.684682	0.678675	0.29	0.16
SDS	(0.281,0.298]	(0.169,0.185]	1095	0.592866	0.588073	0.29	0.18
SDS	(0.281,0.298]	(0.185,0.202]	1785	0.469949	0.46678	0.29	0.19
SDS	(0.281,0.298]	(0.202,0.219]	2671	0.347695	0.346143	0.29	0.21
SDS	(0.281,0.298]	(0.219,0.23]	3488	0.342478	0.340994	0.29	0.22
SDS	(0.281,0.298]	(0.23,0.25]	6333	0.211213	0.211465	0.29	0.24
SDS	(0.281,0.298]	(0.25,0.265]	5798	0.123015	0.124432	0.29	0.26
SDS	(0.281,0.298]	(0.265,0.281]	6239	0.0554057	0.057717	0.29	0.27
SDS	(0.281,0.298]	(0.281,0.298]	6115	0.00235762	0.0053701	0.29	0.29
SDS	(0.281,0.298]	(0.298,0.316]	8116	-0.0931834	-0.088908	0.29	0.31
SDS	(0.281,0.298]	(0.316,0.337]	6584	-0.183097	-0.177633	0.29	0.33
SDS	(0.281,0.298]	(0.337,0.352]	3864	-0.268344	-0.261753	0.29	0.34
SDS	(0.281,0.298]	(0.352,0.371]	3580	-0.352742	-0.345035	0.29	0.36
SDS	(0.281,0.298]	(0.371,0.388]	2802	-0.507054	-0.497307	0.29	0.38
SDS	(0.281,0.298]	(0.388,0.408]	2184	-0.556359	-0.545961	0.29	0.4
SDS	(0.281,0.298]	(0.408,0.427]	870	-0.516376	-0.506506	0.29	0.42
SDS	(0.281,0.298]	(0.427,0.444]	712	-0.730713	-0.71801	0.29	0.44
SDS	(0.281,0.298]	(0.444,0.464]	416	-0.886086	-0.87133	0.29	0.45
SDS	(0.281,0.298]	(0.464,0.483]	166	-1.11199	-1.09424	0.29	0.47
SDS	(0.281,0.298]	(0.483,0.5]	153	-1.06848	-1.05132	0.29	0.49
SDS	(0.298,0.316]	(0.0459,0.0618]	3	3.73148	3.6852	0.31	0.05
SDS	(0.298,0.316]	(0.0618,0.0765]	1	2.49795	2.46797	0.31	0.07
SDS	(0.298,0.316]	(0.0899,0.101]	2	8.57317	8.46288	0.31	0.1
SDS	(0.298,0.316]	(0.101,0.112]	3	3.34111	3.29999	0.31	0.11
SDS	(0.298,0.316]	(0.112,0.129]	18	0.896489	0.887681	0.31	0.12
SDS	(0.298,0.316]	(0.129,0.143]	45	0.918991	0.909886	0.31	0.14
SDS	(0.298,0.316]	(0.143,0.157]	82	1.24204	1.22867	0.31	0.15
SDS	(0.298,0.316]	(0.157,0.169]	296	1.07175	1.06062	0.31	0.16
SDS	(0.298,0.316]	(0.169,0.185]	546	0.859136	0.850823	0.31	0.18
SDS	(0.298,0.316]	(0.185,0.202]	1055	0.610728	0.605699	0.31	0.19
SDS	(0.298,0.316]	(0.202,0.219]	1678	0.553801	0.549524	0.31	0.21
SDS	(0.298,0.316]	(0.219,0.23]	2492	0.433619	0.43093	0.31	0.22
SDS	(0.298,0.316]	(0.23,0.25]	4876	0.373536	0.371642	0.31	0.24
SDS	(0.298,0.316]	(0.25,0.265]	4562	0.246354	0.246141	0.31	0.26
SDS	(0.298,0.316]	(0.265,0.281]	6037	0.0748656	0.0769196	0.31	0.27
SDS	(0.298,0.316]	(0.281,0.298]	6179	0.0743907	0.076451	0.31	0.29
SDS	(0.298,0.316]	(0.298,0.316]	8475	0.00860577	0.0115357	0.31	0.31
SDS	(0.298,0.316]	(0.316,0.337]	7842	-0.0895998	-0.0853717	0.31	0.33
SDS	(0.298,0.316]	(0.337,0.352]	5094	-0.206291	-0.200521	0.31	0.34
SDS	(0.298,0.316]	(0.352,0.371]	4139	-0.281245	-0.274483	0.31	0.36
SDS	(0.298,0.316]	(0.371,0.388]	3746	-0.336502	-0.32901	0.31	0.38
SDS	(0.298,0.316]	(0.388,0.408]	3740	-0.425932	-0.417258	0.31	0.4
SDS	(0.298,0.316]	(0.408,0.427]	1488	-0.624787	-0.613485	0.31	0.42
SDS	(0.298,0.316]	(0.427,0.444]	874	-0.608146	-0.597063	0.31	0.44
SDS	(0.298,0.316]	(0.444,0.464]	856	-0.790777	-0.77728	0.31	0.45
SDS	(0.298,0.316]	(0.464,0.483]	427	-0.861276	-0.846847	0.31	0.47
SDS	(0.298,0.316]	(0.483,0.5]	249	-1.10781	-1.09012	0.31	0.49
SDS	(0.316,0.337]	(0.0459,0.0618]	1	4.14038	4.08869	0.33	0.05
SDS	(0.316,0.337]	(0.101,0.112]	1	0.786899	0.779541	0.33	0.11
SDS	(0.316,0.337]	(0.112,0.129]	25	1.92726	1.90483	0.33	0.12
SDS	(0.316,0.337]	(0.129,0.143]	26	1.41032	1.39472	0.33	0.14
SDS	(0.316,0.337]	(0.143,0.157]	106	0.969279	0.959509	0.33	0.15
SDS	(0.316,0.337]	(0.157,0.169]	155	1.2059	1.193	0.33	0.16
SDS	(0.316,0.337]	(0.169,0.185]	334	0.930506	0.921249	0.33	0.18
SDS	(0.316,0.337]	(0.185,0.202]	531	0.626504	0.621266	0.33	0.19
SDS	(0.316,0.337]	(0.202,0.219]	986	0.643529	0.638066	0.33	0.21
SDS	(0.316,0.337]	(0.219,0.23]	1562	0.622022	0.616843	0.33	0.22
SDS	(0.316,0.337]	(0.23,0.25]	3351	0.458653	0.455634	0.33	0.24
SDS	(0.316,0.337]	(0.25,0.265]	3690	0.364182	0.362412	0.33	0.26
SDS	(0.316,0.337]	(0.265,0.281]	4585	0.319541	0.318361	0.33	0.27
SDS	(0.316,0.337]	(0.281,0.298]	5202	0.192477	0.192976	0.33	0.29
SDS	(0.316,0.337]	(0.298,0.316]	7741	0.0822006	0.0841576	0.33	0.31
SDS	(0.316,0.337]	(0.316,0.337]	7887	-0.0133107	-0.0100911	0.33	0.33
SDS	(0.316,0.337]	(0.337,0.352]	5775	-0.110691	-0.106184	0.33	0.34
SDS	(0.316,0.337]	(0.352,0.371]	5196	-0.203194	-0.197465	0.33	0.36
SDS	(0.316,0.337]	(0.371,0.388]	4655	-0.212735	-0.206879	0.33	0.38
SDS	(0.316,0.337]	(0.388,0.408]	4793	-0.392845	-0.384608	0.33	0.4
SDS	(0.316,0.337]	(0.408,0.427]	2248	-0.4466	-0.437653	0.33	0.42
SDS	(0.316,0.337]	(0.427,0.444]	1979	-0.547892	-0.537606	0.33	0.44
SDS	(0.316,0.337]	(0.444,0.464]	1229	-0.586459	-0.575663	0.33	0.45
SDS	(0.316,0.337]	(0.464,0.483]	724	-0.712692	-0.700227	0.33	0.47
SDS	(0.316,0.337]	(0.483,0.5]	539	-0.862492	-0.848047	0.33	0.49
SDS	(0.337,0.352]	(0.0765,0.0899]	1	2.50205	2.47202	0.34	0.08
SDS	(0.337,0.352]	(0.112,0.129]	4	1.53282	1.5156	0.34	0.12
SDS	(0.337,0.352]	(0.129,0.143]	8	0.891916	0.883169	0.34	0.14
SDS	(0.337,0.352]	(0.143,0.157]	17	0.898569	0.889735	0.34	0.15
SDS	(0.337,0.352]	(0.157,0.169]	50	0.848014	0.839848	0.34	0.16
SDS	(0.337,0.352]	(0.169,0.185]	235	0.628839	0.62357	0.34	0.18
SDS	(0.337,0.352]	(0.185,0.202]	345	0.617752	0.61263	0.34	0.19
SDS	(0.337,0.352]	(0.202,0.219]	636	0.693251	0.68713	0.34	0.21
SDS	(0.337,0.352]	(0.219,0.23]	1116	0.688019	0.681967	0.34	0.22
SDS	(0.337,0.352]	(0.23,0.25]	2321	0.545192	0.541029	0.34	0.24
SDS	(0.337,0.352]	(0.25,0.265]	2458	0.482579	0.479243	0.34	0.26
SDS	(0.337,0.352]	(0.265,0.281]	3707	0.481298	0.477979	0.34	0.27
SDS	(0.337,0.352]	(0.281,0.298]	4106	0.342473	0.340989	0.34	0.29
SDS	(0.337,0.352]	(0.298,0.316]	6999	0.16526	0.166119	0.34	0.31
SDS	(0.337,0.352]	(0.316,0.337]	7605	0.0565933	0.0588888	0.34	0.33
SDS	(0.337,0.352]	(0.337,0.352]	6025	-0.0163253	-0.0130658	0.34	0.34
SDS	(0.337,0.352]	(0.352,0.371]	5434	-0.161299	-0.156123	0.34	0.36
SDS	(0.337,0.352]	(0.371,0.388]	5471	-0.200428	-0.194735	0.34	0.38
SDS	(0.337,0.352]	(0.388,0.408]	6012	-0.254124	-0.247721	0.34	0.4
SDS	(0.337,0.352]	(0.408,0.427]	3007	-0.392103	-0.383876	0.34	0.42
SDS	(0.337,0.352]	(0.427,0.444]	2658	-0.387146	-0.378985	0.34	0.44
SDS	(0.337,0.352]	(0.444,0.464]	2166	-0.506711	-0.496969	0.34	0.45
SDS	(0.337,0.352]	(0.464,0.483]	1250	-0.629939	-0.618568	0.34	0.47
SDS	(0.337,0.352]	(0.483,0.5]	985	-0.82881	-0.814811	0.34	0.49
SDS	(0.352,0.371]	[0,0.0459]	2	5.38112	5.31303	0.36	0.02
SDS	(0.352,0.371]	(0.101,0.112]	1	7.39685	7.30211	0.36	0.11
SDS	(0.352,0.371]	(0.112,0.129]	1	1.44249	1.42646	0.36	0.12
SDS	(0.352,0.371]	(0.129,0.143]	12	1.36724	1.35221	0.36	0.14
SDS	(0.352,0.371]	(0.143,0.157]	13	1.01295	1.0026	0.36	0.15
SDS	(0.352,0.371]	(0.157,0.169]	16	0.959854	0.950209	0.36	0.16
SDS	(0.352,0.371]	(0.169,0.185]	71	1.12951	1.11762	0.36	0.18
SDS	(0.352,0.371]	(0.185,0.202]	222	0.812761	0.805061	0.36	0.19
SDS	(0.352,0.371]	(0.202,0.219]	365	0.710774	0.704422	0.36	0.21
SDS	(0.352,0.371]	(0.219,0.23]	727	0.709155	0.702825	0.36	0.22
SDS	(0.352,0.371]	(0.23,0.25]	1815	0.596202	0.591364	0.36	0.24
SDS	(0.352,0.371]	(0.25,0.265]	2206	0.609504	0.604491	0.36	0.26
SDS	(0.352,0.371]	(0.265,0.281]	2945	0.521248	0.517402	0.36	0.27
SDS	(0.352,0.371]	(0.281,0.298]	4190	0.366211	0.364413	0.36	0.29
SDS	(0.352,0.371]	(0.298,0.316]	7189	0.278984	0.27834	0.36	0.31
SDS	(0.352,0.371]	(0.316,0.337]	8963	0.142292	0.143454	0.36	0.33
SDS	(0.352,0.371]	(0.337,0.352]	6883	0.0862307	0.0881344	0.36	0.34
SDS	(0.352,0.371]	(0.352,0.371]	7160	-0.0341102	-0.0306157	0.36	0.36
SDS	(0.352,0.371]	(0.371,0.388]	7843	-0.103319	-0.0989091	0.36	0.38
SDS	(0.352,0.371]	(0.388,0.408]	9845	-0.246539	-0.240236	0.36	0.4
SDS	(0.352,0.371]	(0.408,0.427]	5144	-0.277404	-0.270694	0.36	0.42
SDS	(0.352,0.371]	(0.427,0.444]	4634	-0.338223	-0.330708	0.36	0.44
SDS	(0.352,0.371]	(0.444,0.464]	4399	-0.413565	-0.405054	0.36	0.45
SDS	(0.352,0.371]	(0.464,0.483]	2883	-0.60317	-0.592153	0.36	0.47
SDS	(0.352,0.371]	(0.483,0.5]	2389	-0.693381	-0.681172	0.36	0.49
SDS	(0.371,0.388]	(0.0618,0.0765]	1	4.37435	4.31957	0.38	0.07
SDS	(0.371,0.388]	(0.143,0.157]	1	6.12393	6.04602	0.38	0.15
SDS	(0.371,0.388]	(0.157,0.169]	4	0.864944	0.856554	0.38	0.16
SDS	(0.371,0.388]	(0.169,0.185]	29	0.481362	0.478042	0.38	0.18
SDS	(0.371,0.388]	(0.185,0.202]	23	0.719329	0.712864	0.38	0.19
SDS	(0.371,0.388]	(0.202,0.219]	160	0.886195	0.877524	0.38	0.21
SDS	(0.371,0.388]	(0.219,0.23]	259	0.866977	0.85856	0.38	0.22
SDS	(0.371,0.388]	(0.23,0.25]	726	0.473315	0.470102	0.38	0.24
SDS	(0.371,0.388]	(0.25,0.265]	978	0.648366	0.642839	0.38	0.26
SDS	(0.371,0.388]	(0.265,0.281]	1412	0.539783	0.535692	0.38	0.27
SDS	(0.371,0.388]	(0.281,0.298]	2252	0.484756	0.481392	0.38	0.29
SDS	(0.371,0.388]	(0.298,0.316]	4114	0.41595	0.413496	0.38	0.31
SDS	(0.371,0.388]	(0.316,0.337]	5430	0.304191	0.303213	0.38	0.33
SDS	(0.371,0.388]	(0.337,0.352]	5354	0.17708	0.177783	0.38	0.34
SDS	(0.371,0.388]	(0.352,0.371]	5426	0.0418421	0.0443327	0.38	0.36
SDS	(0.371,0.388]	(0.371,0.388]	6293	0.0207718	0.0235409	0.38	0.38
SDS	(0.371,0.388]	(0.388,0.408]	7985	-0.0995215	-0.0951622	0.38	0.4
SDS	(0.371,0.388]	(0.408,0.427]	4971	-0.191182	-0.185611	0.38	0.42
SDS	(0.371,0.388]	(0.427,0.444]	4821	-0.31339	-0.306203	0.38	0.44
SDS	(0.371,0.388]	(0.444,0.464]	4424	-0.375096	-0.367094	0.38	0.45
SDS	(0.371,0.388]	(0.464,0.483]	3097	-0.550582	-0.54026	0.38	0.47
SDS	(0.371,0.388]	(0.483,0.5]	2949	-0.482756	-0.473331	0.38	0.49
SDS	(0.388,0.408]	(0.0765,0.0899]	1	4.43824	4.38261	0.4	0.08
SDS	(0.388,0.408]	(0.101,0.112]	1	1.59281	1.5748	0.4	0.11
SDS	(0.388,0.408]	(0.157,0.169]	1	0.809272	0.801617	0.4	0.16
SDS	(0.388,0.408]	(0.169,0.185]	6	1.48398	1.46741	0.4	0.18
SDS	(0.388,0.408]	(0.185,0.202]	33	2.08355	2.05905	0.4	0.19
SDS	(0.388,0.408]	(0.202,0.219]	44	1.42592	1.41011	0.4	0.21
SDS	(0.388,0.408]	(0.219,0.23]	152	0.733839	0.727182	0.4	0.22
SDS	(0.388,0.408]	(0.23,0.25]	441	0.791648	0.784227	0.4	0.24
SDS	(0.388,0.408]	(0.25,0.265]	654	0.753087	0.746175	0.4	0.26
SDS	(0.388,0.408]	(0.265,0.281]	877	0.51093	0.50722	0.4	0.27
SDS	(0.388,0.408]	(0.281,0.298]	1282	0.584513	0.57983	0.4	0.29
SDS	(0.388,0.408]	(0.298,0.316]	2967	0.420125	0.417615	0.4	0.31
SDS	(0.388,0.408]	(0.316,0.337]	4298	0.414491	0.412055	0.4	0.33
SDS	(0.388,0.408]	(0.337,0.352]	4565	0.268766	0.268256	0.4	0.34
SDS	(0.388,0.408]	(0.352,0.371]	4963	0.162464	0.16336	0.4	0.36
SDS	(0.388,0.408]	(0.371,0.388]	5922	0.0872329	0.0891234	0.4	0.38
SDS	(0.388,0.408]	(0.388,0.408]	8078	-0.00799603	-0.00484668	0.4	0.4
SDS	(0.388,0.408]	(0.408,0.427]	5174	-0.151097	-0.146056	0.4	0.42
SDS	(0.388,0.408]	(0.427,0.444]	5770	-0.232979	-0.226855	0.4	0.44
SDS	(0.388,0.408]	(0.444,0.464]	5933	-0.331407	-0.323982	0.4	0.45
SDS	(0.388,0.408]	(0.464,0.483]	4557	-0.479675	-0.47029	0.4	0.47
SDS	(0.388,0.408]	(0.483,0.5]	4426	-0.549468	-0.539161	0.4	0.49
SDS	(0.408,0.427]	(0.112,0.129]	3	2.61096	2.57949	0.42	0.12
SDS	(0.408,0.427]	(0.129,0.143]	2	4.23266	4.17975	0.42	0.14
SDS	(0.408,0.427]	(0.157,0.169]	1	4.36805	4.31335	0.42	0.16
SDS	(0.408,0.427]	(0.169,0.185]	9	4.72859	4.66913	0.42	0.18
SDS	(0.408,0.427]	(0.185,0.202]	10	2.52708	2.49672	0.42	0.19
SDS	(0.408,0.427]	(0.202,0.219]	13	1.15927	1.14699	0.42	0.21
SDS	(0.408,0.427]	(0.219,0.23]	94	1.55965	1.54207	0.42	0.22
SDS	(0.408,0.427]	(0.23,0.25]	249	1.05081	1.03997	0.42	0.24
SDS	(0.408,0.427]	(0.25,0.265]	394	0.612419	0.607367	0.42	0.26
SDS	(0.408,0.427]	(0.265,0.281]	692	0.787432	0.780066	0.42	0.27
SDS	(0.408,0.427]	(0.281,0.298]	1059	0.721043	0.714555	0.42	0.29
SDS	(0.408,0.427]	(0.298,0.316]	2498	0.73628	0.729591	0.42	0.31
SDS	(0.408,0.427]	(0.316,0.337]	3389	0.421946	0.419412	0.42	0.33
SDS	(0.408,0.427]	(0.337,0.352]	3789	0.313542	0.312441	0.42	0.34
SDS	(0.408,0.427]	(0.352,0.371]	4505	0.317146	0.315998	0.42	0.36
SDS	(0.408,0.427]	(0.371,0.388]	6042	0.193703	0.194186	0.42	0.38
SDS	(0.408,0.427]	(0.388,0.408]	9744	0.14267	0.143828	0.42	0.4
SDS	(0.408,0.427]	(0.408,0.427]	6746	-0.000687729	0.00236501	0.42	0.42
SDS	(0.408,0.427]	(0.427,0.444]	7339	-0.0803331	-0.0762275	0.42	0.44
SDS	(0.408,0.427]	(0.444,0.464]	8970	-0.20945	-0.203638	0.42	0.45
SDS	(0.408,0.427]	(0.464,0.483]	7688	-0.359269	-0.351476	0.42	0.47
SDS	(0.408,0.427]	(0.483,0.5]	7423	-0.40597	-0.39756	0.42	0.49
SDS	(0.427,0.444]	(0.101,0.112]	1	3.66942	3.62396	0.44	0.11
SDS	(0.427,0.444]	(0.157,0.169]	10	4.31344	4.25946	0.44	0.16
SDS	(0.427,0.444]	(0.169,0.185]	23	5.99324	5.91706	0.44	0.18
SDS	(0.427,0.444]	(0.185,0.202]	19	1.04345	1.0327	0.44	0.19
SDS	(0.427,0.444]	(0.202,0.219]	9	1.62159	1.6032	0.44	0.21
SDS	(0.427,0.444]	(0.219,0.23]	18	0.721072	0.714583	0.44	0.22
SDS	(0.427,0.444]	(0.23,0.25]	63	0.654867	0.649254	0.44	0.24
SDS	(0.427,0.444]	(0.25,0.265]	150	1.13043	1.11853	0.44	0.26
SDS	(0.427,0.444]	(0.265,0.281]	276	0.951326	0.941794	0.44	0.27
SDS	(0.427,0.444]	(0.281,0.298]	528	0.829212	0.821294	0.44	0.29
SDS	(0.427,0.444]	(0.298,0.316]	1333	0.637644	0.632258	0.44	0.31
SDS	(0.427,0.444]	(0.316,0.337]	2292	0.469981	0.466812	0.44	0.33
SDS	(0.427,0.444]	(0.337,0.352]	2457	0.42225	0.419712	0.44	0.34
SDS	(0.427,0.444]	(0.352,0.371]	3471	0.383956	0.381924	0.44	0.36
SDS	(0.427,0.444]	(0.371,0.388]	5123	0.211034	0.211288	0.44	0.38
SDS	(0.427,0.444]	(0.388,0.408]	8289	0.206528	0.206842	0.44	0.4
SDS	(0.427,0.444]	(0.408,0.427]	6410	0.151726	0.152764	0.44	0.42
SDS	(0.427,0.444]	(0.427,0.444]	8475	0.00216997	0.00518494	0.44	0.44
SDS	(0.427,0.444]	(0.444,0.464]	9930	-0.209383	-0.203571	0.44	0.45
SDS	(0.427,0.444]	(0.464,0.483]	9662	-0.25445	-0.248043	0.44	0.47
SDS	(0.427,0.444]	(0.483,0.5]	8781	-0.309502	-0.302367	0.44	0.49
SDS	(0.444,0.464]	(0.129,0.143]	1	2.04973	2.02567	0.45	0.14
SDS	(0.444,0.464]	(0.143,0.157]	1	1.33513	1.32052	0.45	0.15
SDS	(0.444,0.464]	(0.185,0.202]	2	5.3059	5.2388	0.45	0.19
SDS	(0.444,0.464]	(0.202,0.219]	3	0.539487	0.535399	0.45	0.21
SDS	(0.444,0.464]	(0.219,0.23]	24	0.595263	0.590437	0.45	0.22
SDS	(0.444,0.464]	(0.23,0.25]	32	1.01781	1.00739	0.45	0.24
SDS	(0.444,0.464]	(0.25,0.265]	67	1.10362	1.09208	0.45	0.26
SDS	(0.444,0.464]	(0.265,0.281]	98	0.6503	0.644747	0.45	0.27
SDS	(0.444,0.464]	(0.281,0.298]	257	0.690091	0.684013	0.45	0.29
SDS	(0.444,0.464]	(0.298,0.316]	649	0.838374	0.830335	0.45	0.31
SDS	(0.444,0.464]	(0.316,0.337]	1284	0.600427	0.595533	0.45	0.33
SDS	(0.444,0.464]	(0.337,0.352]	1583	0.486103	0.482721	0.45	0.34
SDS	(0.444,0.464]	(0.352,0.371]	2292	0.504058	0.500439	0.45	0.36
SDS	(0.444,0.464]	(0.371,0.388]	3752	0.379473	0.3775	0.45	0.38
SDS	(0.444,0.464]	(0.388,0.408]	6075	0.302478	0.301523	0.45	0.4
SDS	(0.444,0.464]	(0.408,0.427]	5469	0.241316	0.24117	0.45	0.42
SDS	(0.444,0.464]	(0.427,0.444]	7520	0.196443	0.19689	0.45	0.44
SDS	(0.444,0.464]	(0.444,0.464]	9909	0.0619459	0.0641706	0.45	0.45
SDS	(0.444,0.464]	(0.464,0.483]	9494	-0.24924	-0.242901	0.45	0.47
SDS	(0.444,0.464]	(0.483,0.5]	9667	-0.302073	-0.295037	0.45	0.49
SDS	(0.464,0.483]	(0.0459,0.0618]	2	6.37001	6.28885	0.47	0.05
SDS	(0.464,0.483]	(0.0765,0.0899]	2	6.59013	6.50605	0.47	0.08
SDS	(0.464,0.483]	(0.185,0.202]	1	0.868766	0.860325	0.47	0.19
SDS	(0.464,0.483]	(0.23,0.25]	15	0.926032	0.916834	0.47	0.24
SDS	(0.464,0.483]	(0.25,0.265]	50	0.764931	0.757863	0.47	0.26
SDS	(0.464,0.483]	(0.265,0.281]	74	0.846947	0.838794	0.47	0.27
SDS	(0.464,0.483]	(0.281,0.298]	184	0.855662	0.847395	0.47	0.29
SDS	(0.464,0.483]	(0.298,0.316]	441	1.08889	1.07754	0.47	0.31
SDS	(0.464,0.483]	(0.316,0.337]	1170	0.843619	0.835511	0.47	0.33
SDS	(0.464,0.483]	(0.337,0.352]	1488	0.645268	0.639782	0.47	0.34
SDS	(0.464,0.483]	(0.352,0.371]	2149	0.516293	0.512511	0.47	0.36
SDS	(0.464,0.483]	(0.371,0.388]	4002	0.538656	0.534579	0.47	0.38
SDS	(0.464,0.483]	(0.388,0.408]	8022	0.406843	0.404508	0.47	0.4
SDS	(0.464,0.483]	(0.408,0.427]	6867	0.408372	0.406018	0.47	0.42
SDS	(0.464,0.483]	(0.427,0.444]	10017	0.286407	0.285665	0.47	0.44
SDS	(0.464,0.483]	(0.444,0.464]	14152	0.242353	0.242193	0.47	0.45
SDS	(0.464,0.483]	(0.464,0.483]	14475	0.0270496	0.0297357	0.47	0.47
SDS	(0.464,0.483]	(0.483,0.5]	15639	-0.131417	-0.126636	0.47	0.49
SDS	(0.483,0.5]	(0.0618,0.0765]	1	6.22701	6.14774	0.49	0.07
SDS	(0.483,0.5]	(0.0899,0.101]	3	5.75578	5.68273	0.49	0.1
SDS	(0.483,0.5]	(0.143,0.157]	1	5.63491	5.56346	0.49	0.15
SDS	(0.483,0.5]	(0.157,0.169]	1	5.01538	4.95212	0.49	0.16
SDS	(0.483,0.5]	(0.202,0.219]	1	2.89981	2.86452	0.49	0.21
SDS	(0.483,0.5]	(0.23,0.25]	4	1.16664	1.15427	0.49	0.24
SDS	(0.483,0.5]	(0.25,0.265]	42	0.674862	0.668985	0.49	0.26
SDS	(0.483,0.5]	(0.265,0.281]	25	0.973083	0.963264	0.49	0.27
SDS	(0.483,0.5]	(0.281,0.298]	56	1.10598	1.0944	0.49	0.29
SDS	(0.483,0.5]	(0.298,0.316]	214	0.971184	0.961389	0.49	0.31
SDS	(0.483,0.5]	(0.316,0.337]	644	0.664137	0.658402	0.49	0.33
SDS	(0.483,0.5]	(0.337,0.352]	880	0.701719	0.695487	0.49	0.34
SDS	(0.483,0.5]	(0.352,0.371]	1239	0.440496	0.437716	0.49	0.36
SDS	(0.483,0.5]	(0.371,0.388]	2164	0.515155	0.511388	0.49	0.38
SDS	(0.483,0.5]	(0.388,0.408]	4338	0.489122	0.4857	0.49	0.4
SDS	(0.483,0.5]	(0.408,0.427]	4496	0.369653	0.36781	0.49	0.42
SDS	(0.483,0.5]	(0.427,0.444]	6391	0.293094	0.292263	0.49	0.44
SDS	(0.483,0.5]	(0.444,0.464]	9318	0.230886	0.230877	0.49	0.45
SDS	(0.483,0.5]	(0.464,0.483]	9573	0.0835852	0.0855239	0.49	0.47
SDS	(0.483,0.5]	(0.483,0.5]	9931	0.0371363	0.039689	0.49	0.49
ukb_neale1	[0,0.0459]	[0,0.0459]	35891	-4.72349e-05	-0.00592452	0.02	0.02
ukb_neale1	[0,0.0459]	(0.0459,0.0618]	11982	-6.72305e-05	-0.0101495	0.02	0.05
ukb_neale1	[0,0.0459]	(0.0618,0.0765]	15844	0.000116554	0.0286832	0.02	0.07
ukb_neale1	[0,0.0459]	(0.0765,0.0899]	7572	0.000116167	0.0286016	0.02	0.08
ukb_neale1	[0,0.0459]	(0.0899,0.101]	5213	4.28392e-05	0.0131077	0.02	0.1
ukb_neale1	[0,0.0459]	(0.101,0.112]	4124	0.000605569	0.13201	0.02	0.11
ukb_neale1	[0,0.0459]	(0.112,0.129]	1736	0.00086509	0.186845	0.02	0.12
ukb_neale1	[0,0.0459]	(0.129,0.143]	730	0.000574701	0.125488	0.02	0.14
ukb_neale1	[0,0.0459]	(0.143,0.157]	253	0.000209033	0.0482236	0.02	0.15
ukb_neale1	[0,0.0459]	(0.157,0.169]	146	-0.00185538	-0.387978	0.02	0.16
ukb_neale1	[0,0.0459]	(0.169,0.185]	49	0.00100351	0.216093	0.02	0.18
ukb_neale1	[0,0.0459]	(0.185,0.202]	28	-0.00286112	-0.600484	0.02	0.19
ukb_neale1	[0,0.0459]	(0.202,0.219]	54	0.00165265	0.353253	0.02	0.21
ukb_neale1	[0,0.0459]	(0.219,0.23]	10	-0.0087182	-1.83806	0.02	0.22
ukb_neale1	(0.0459,0.0618]	[0,0.0459]	11068	-0.000163766	-0.030547	0.05	0.02
ukb_neale1	(0.0459,0.0618]	(0.0459,0.0618]	21526	-0.000135502	-0.024575	0.05	0.05
ukb_neale1	(0.0459,0.0618]	(0.0618,0.0765]	18724	-0.00015344	-0.0283652	0.05	0.07
ukb_neale1	(0.0459,0.0618]	(0.0765,0.0899]	9153	9.83445e-05	0.0248357	0.05	0.08
ukb_neale1	(0.0459,0.0618]	(0.0899,0.101]	7071	-0.000102135	-0.0175247	0.05	0.1
ukb_neale1	(0.0459,0.0618]	(0.101,0.112]	7259	7.96029e-05	0.0208757	0.05	0.11
ukb_neale1	(0.0459,0.0618]	(0.112,0.129]	3877	7.20523e-05	0.0192803	0.05	0.12
ukb_neale1	(0.0459,0.0618]	(0.129,0.143]	2212	0.000313109	0.0702145	0.05	0.14
ukb_neale1	(0.0459,0.0618]	(0.143,0.157]	859	-3.37863e-05	-0.0030829	0.05	0.15
ukb_neale1	(0.0459,0.0618]	(0.157,0.169]	520	0.000929856	0.20053	0.05	0.16
ukb_neale1	(0.0459,0.0618]	(0.169,0.185]	285	-0.000271343	-0.0532775	0.05	0.18
ukb_neale1	(0.0459,0.0618]	(0.185,0.202]	120	0.000396177	0.0877662	0.05	0.19
ukb_neale1	(0.0459,0.0618]	(0.202,0.219]	34	0.000212914	0.0490438	0.05	0.21
ukb_neale1	(0.0459,0.0618]	(0.219,0.23]	25	-0.00461192	-0.970421	0.05	0.22
ukb_neale1	(0.0459,0.0618]	(0.23,0.25]	14	-0.00387306	-0.814302	0.05	0.24
ukb_neale1	(0.0459,0.0618]	(0.25,0.265]	1	3.3314e-05	0.0110951	0.05	0.26
ukb_neale1	(0.0459,0.0618]	(0.281,0.298]	2	-0.0108765	-2.2941	0.05	0.29
ukb_neale1	(0.0459,0.0618]	(0.298,0.316]	1	-0.0109796	-2.31588	0.05	0.31
ukb_neale1	(0.0618,0.0765]	[0,0.0459]	10403	-4.58963e-05	-0.00564167	0.07	0.02
ukb_neale1	(0.0618,0.0765]	(0.0459,0.0618]	12248	-0.000493086	-0.100131	0.07	0.05
ukb_neale1	(0.0618,0.0765]	(0.0618,0.0765]	12769	6.33392e-05	0.0174393	0.07	0.07
ukb_neale1	(0.0618,0.0765]	(0.0765,0.0899]	7290	0.000107365	0.0267418	0.07	0.08
ukb_neale1	(0.0618,0.0765]	(0.0899,0.101]	6347	-2.93212e-05	-0.00213945	0.07	0.1
ukb_neale1	(0.0618,0.0765]	(0.101,0.112]	6884	-1.66264e-06	0.00370468	0.07	0.11
ukb_neale1	(0.0618,0.0765]	(0.112,0.129]	4407	-7.60185e-06	0.00244976	0.07	0.12
ukb_neale1	(0.0618,0.0765]	(0.129,0.143]	2721	0.000376777	0.0836671	0.07	0.14
ukb_neale1	(0.0618,0.0765]	(0.143,0.157]	1137	0.000386676	0.0857588	0.07	0.15
ukb_neale1	(0.0618,0.0765]	(0.157,0.169]	786	0.000612112	0.133392	0.07	0.16
ukb_neale1	(0.0618,0.0765]	(0.169,0.185]	489	0.000567726	0.124014	0.07	0.18
ukb_neale1	(0.0618,0.0765]	(0.185,0.202]	253	0.000148486	0.0354303	0.07	0.19
ukb_neale1	(0.0618,0.0765]	(0.202,0.219]	119	-0.00196313	-0.410743	0.07	0.21
ukb_neale1	(0.0618,0.0765]	(0.219,0.23]	24	0.00202799	0.43256	0.07	0.22
ukb_neale1	(0.0618,0.0765]	(0.23,0.25]	7	0.000252494	0.0574068	0.07	0.24
ukb_neale1	(0.0618,0.0765]	(0.25,0.265]	6	-0.00235904	-0.494398	0.07	0.26
ukb_neale1	(0.0618,0.0765]	(0.265,0.281]	4	-0.00699417	-1.47378	0.07	0.27
ukb_neale1	(0.0765,0.0899]	[0,0.0459]	10575	1.39471e-06	0.00435068	0.08	0.02
ukb_neale1	(0.0765,0.0899]	(0.0459,0.0618]	12204	-0.000239946	-0.0466434	0.08	0.05
ukb_neale1	(0.0765,0.0899]	(0.0618,0.0765]	15756	-5.56424e-05	-0.00770098	0.08	0.07
ukb_neale1	(0.0765,0.0899]	(0.0765,0.0899]	10494	-0.000142594	-0.0260735	0.08	0.08
ukb_neale1	(0.0765,0.0899]	(0.0899,0.101]	9459	3.0108e-05	0.0104177	0.08	0.1
ukb_neale1	(0.0765,0.0899]	(0.101,0.112]	12112	0.000210933	0.0486252	0.08	0.11
ukb_neale1	(0.0765,0.0899]	(0.112,0.129]	9273	0.000414935	0.0917298	0.08	0.12
ukb_neale1	(0.0765,0.0899]	(0.129,0.143]	6110	-0.000340624	-0.0679162	0.08	0.14
ukb_neale1	(0.0765,0.0899]	(0.143,0.157]	3126	-0.000556219	-0.11347	0.08	0.15
ukb_neale1	(0.0765,0.0899]	(0.157,0.169]	2779	-5.29406e-06	0.00293738	0.08	0.16
ukb_neale1	(0.0765,0.0899]	(0.169,0.185]	1526	-0.000449094	-0.0908353	0.08	0.18
ukb_neale1	(0.0765,0.0899]	(0.185,0.202]	686	8.38262e-05	0.0217681	0.08	0.19
ukb_neale1	(0.0765,0.0899]	(0.202,0.219]	449	-0.00134843	-0.28086	0.08	0.21
ukb_neale1	(0.0765,0.0899]	(0.219,0.23]	185	0.00189175	0.403774	0.08	0.22
ukb_neale1	(0.0765,0.0899]	(0.23,0.25]	49	-0.0013349	-0.278001	0.08	0.24
ukb_neale1	(0.0765,0.0899]	(0.25,0.265]	5	-0.00243164	-0.509737	0.08	0.26
ukb_neale1	(0.0765,0.0899]	(0.265,0.281]	32	-0.0101518	-2.14097	0.08	0.27
ukb_neale1	(0.0765,0.0899]	(0.281,0.298]	9	0.00210379	0.448578	0.08	0.29
ukb_neale1	(0.0765,0.0899]	(0.298,0.316]	4	-0.00331733	-0.69688	0.08	0.31
ukb_neale1	(0.0899,0.101]	[0,0.0459]	4650	-9.76135e-06	0.00199346	0.1	0.02
ukb_neale1	(0.0899,0.101]	(0.0459,0.0618]	5814	-0.000124842	-0.0223225	0.1	0.05
ukb_neale1	(0.0899,0.101]	(0.0618,0.0765]	9231	0.000262735	0.0595707	0.1	0.07
ukb_neale1	(0.0899,0.101]	(0.0765,0.0899]	6854	3.4575e-05	0.0113615	0.1	0.08
ukb_neale1	(0.0899,0.101]	(0.0899,0.101]	7418	-0.000149269	-0.0274838	0.1	0.1
ukb_neale1	(0.0899,0.101]	(0.101,0.112]	10881	-9.84884e-05	-0.0167541	0.1	0.11
ukb_neale1	(0.0899,0.101]	(0.112,0.129]	9196	-5.75081e-05	-0.00809519	0.1	0.12
ukb_neale1	(0.0899,0.101]	(0.129,0.143]	6593	0.000259828	0.0589565	0.1	0.14
ukb_neale1	(0.0899,0.101]	(0.143,0.157]	3854	-0.000117159	-0.0206992	0.1	0.15
ukb_neale1	(0.0899,0.101]	(0.157,0.169]	3712	-0.000107012	-0.0185552	0.1	0.16
ukb_neale1	(0.0899,0.101]	(0.169,0.185]	2299	-0.000709524	-0.145863	0.1	0.18
ukb_neale1	(0.0899,0.101]	(0.185,0.202]	1352	-0.000145934	-0.0267792	0.1	0.19
ukb_neale1	(0.0899,0.101]	(0.202,0.219]	701	0.000198131	0.0459201	0.1	0.21
ukb_neale1	(0.0899,0.101]	(0.219,0.23]	306	0.0016246	0.347327	0.1	0.22
ukb_neale1	(0.0899,0.101]	(0.23,0.25]	233	0.000483771	0.106274	0.1	0.24
ukb_neale1	(0.0899,0.101]	(0.25,0.265]	68	7.09291e-05	0.019043	0.1	0.26
ukb_neale1	(0.0899,0.101]	(0.265,0.281]	92	-0.00436357	-0.917946	0.1	0.27
ukb_neale1	(0.0899,0.101]	(0.281,0.298]	24	0.000801606	0.173432	0.1	0.29
ukb_neale1	(0.0899,0.101]	(0.298,0.316]	15	0.000432151	0.0953675	0.1	0.31
ukb_neale1	(0.0899,0.101]	(0.352,0.371]	4	-0.00203643	-0.426232	0.1	0.36
ukb_neale1	(0.0899,0.101]	(0.371,0.388]	2	0.00033302	0.0744215	0.1	0.38
ukb_neale1	(0.101,0.112]	[0,0.0459]	2332	-0.000748431	-0.154084	0.11	0.02
ukb_neale1	(0.101,0.112]	(0.0459,0.0618]	3666	6.56555e-06	0.00544326	0.11	0.05
ukb_neale1	(0.101,0.112]	(0.0618,0.0765]	6262	0.000369118	0.0820489	0.11	0.07
ukb_neale1	(0.101,0.112]	(0.0765,0.0899]	5087	0.000252495	0.057407	0.11	0.08
ukb_neale1	(0.101,0.112]	(0.0899,0.101]	5925	-0.000155054	-0.0287061	0.11	0.1
ukb_neale1	(0.101,0.112]	(0.101,0.112]	9579	-0.000350006	-0.0698986	0.11	0.11
ukb_neale1	(0.101,0.112]	(0.112,0.129]	8668	0.000136184	0.0328309	0.11	0.12
ukb_neale1	(0.101,0.112]	(0.129,0.143]	6778	-0.000123722	-0.0220858	0.11	0.14
ukb_neale1	(0.101,0.112]	(0.143,0.157]	4305	4.20654e-05	0.0129442	0.11	0.15
ukb_neale1	(0.101,0.112]	(0.157,0.169]	4206	0.000130769	0.0316869	0.11	0.16
ukb_neale1	(0.101,0.112]	(0.169,0.185]	3023	-0.000325402	-0.0647	0.11	0.18
ukb_neale1	(0.101,0.112]	(0.185,0.202]	1729	-6.29149e-06	0.00272663	0.11	0.19
ukb_neale1	(0.101,0.112]	(0.202,0.219]	1051	0.000243097	0.0554212	0.11	0.21
ukb_neale1	(0.101,0.112]	(0.219,0.23]	604	0.00126509	0.271363	0.11	0.22
ukb_neale1	(0.101,0.112]	(0.23,0.25]	321	0.00164596	0.351839	0.11	0.24
ukb_neale1	(0.101,0.112]	(0.25,0.265]	121	0.00101662	0.218863	0.11	0.26
ukb_neale1	(0.101,0.112]	(0.265,0.281]	45	-0.000521395	-0.106112	0.11	0.27
ukb_neale1	(0.101,0.112]	(0.281,0.298]	26	0.00390696	0.829577	0.11	0.29
ukb_neale1	(0.101,0.112]	(0.298,0.316]	5	-0.000160072	-0.0297665	0.11	0.31
ukb_neale1	(0.101,0.112]	(0.316,0.337]	2	0.00392835	0.834098	0.11	0.33
ukb_neale1	(0.101,0.112]	(0.337,0.352]	1	-0.0073074	-1.53996	0.11	0.34
ukb_neale1	(0.101,0.112]	(0.352,0.371]	1	0.000510644	0.111953	0.11	0.36
ukb_neale1	(0.112,0.129]	[0,0.0459]	1423	-0.000312955	-0.0620699	0.12	0.02
ukb_neale1	(0.112,0.129]	(0.0459,0.0618]	2708	-0.000304198	-0.0602196	0.12	0.05
ukb_neale1	(0.112,0.129]	(0.0618,0.0765]	4891	-0.00026318	-0.0515526	0.12	0.07
ukb_neale1	(0.112,0.129]	(0.0765,0.0899]	4615	0.000281376	0.0635094	0.12	0.08
ukb_neale1	(0.112,0.129]	(0.0899,0.101]	5659	-2.13118e-05	-0.000447084	0.12	0.1
ukb_neale1	(0.112,0.129]	(0.101,0.112]	9158	0.000235374	0.0537893	0.12	0.11
ukb_neale1	(0.112,0.129]	(0.112,0.129]	9686	-4.8469e-05	-0.00618529	0.12	0.12
ukb_neale1	(0.112,0.129]	(0.129,0.143]	7880	-8.13554e-05	-0.013134	0.12	0.14
ukb_neale1	(0.112,0.129]	(0.143,0.157]	6145	-4.82985e-05	-0.00614924	0.12	0.15
ukb_neale1	(0.112,0.129]	(0.157,0.169]	6440	3.89281e-05	0.0122813	0.12	0.16
ukb_neale1	(0.112,0.129]	(0.169,0.185]	4225	-0.000231354	-0.0448281	0.12	0.18
ukb_neale1	(0.112,0.129]	(0.185,0.202]	2831	-0.000226243	-0.043748	0.12	0.19
ukb_neale1	(0.112,0.129]	(0.202,0.219]	1728	-0.000271829	-0.0533801	0.12	0.21
ukb_neale1	(0.112,0.129]	(0.219,0.23]	1001	6.17923e-05	0.0171124	0.12	0.22
ukb_neale1	(0.112,0.129]	(0.23,0.25]	700	0.000410635	0.0908212	0.12	0.24
ukb_neale1	(0.112,0.129]	(0.25,0.265]	217	0.00016733	0.039412	0.12	0.26
ukb_neale1	(0.112,0.129]	(0.265,0.281]	116	0.000145316	0.0347607	0.12	0.27
ukb_neale1	(0.112,0.129]	(0.281,0.298]	47	-0.00319872	-0.671819	0.12	0.29
ukb_neale1	(0.112,0.129]	(0.298,0.316]	21	5.30541e-05	0.0152661	0.12	0.31
ukb_neale1	(0.112,0.129]	(0.316,0.337]	8	0.00157057	0.33591	0.12	0.33
ukb_neale1	(0.112,0.129]	(0.337,0.352]	9	-0.00234307	-0.491023	0.12	0.34
ukb_neale1	(0.112,0.129]	(0.352,0.371]	5	0.00784067	1.66075	0.12	0.36
ukb_neale1	(0.112,0.129]	(0.371,0.388]	2	-0.00223621	-0.468445	0.12	0.38
ukb_neale1	(0.112,0.129]	(0.388,0.408]	4	-0.00459387	-0.966607	0.12	0.4
ukb_neale1	(0.129,0.143]	[0,0.0459]	805	-0.000191758	-0.0364616	0.14	0.02
ukb_neale1	(0.129,0.143]	(0.0459,0.0618]	2007	-0.000564239	-0.115165	0.14	0.05
ukb_neale1	(0.129,0.143]	(0.0618,0.0765]	4077	0.00022173	0.0509064	0.14	0.07
ukb_neale1	(0.129,0.143]	(0.0765,0.0899]	4454	0.000627389	0.13662	0.14	0.08
ukb_neale1	(0.129,0.143]	(0.0899,0.101]	5578	-0.000129049	-0.0232114	0.14	0.1
ukb_neale1	(0.129,0.143]	(0.101,0.112]	9914	0.000100538	0.0252992	0.14	0.11
ukb_neale1	(0.129,0.143]	(0.112,0.129]	10758	-0.000124748	-0.0223026	0.14	0.12
ukb_neale1	(0.129,0.143]	(0.129,0.143]	10721	-0.000381919	-0.0766417	0.14	0.14
ukb_neale1	(0.129,0.143]	(0.143,0.157]	7675	7.61007e-05	0.0201357	0.14	0.15
ukb_neale1	(0.129,0.143]	(0.157,0.169]	9254	0.00035681	0.0794482	0.14	0.16
ukb_neale1	(0.129,0.143]	(0.169,0.185]	6926	2.26581e-05	0.00884354	0.14	0.18
ukb_neale1	(0.129,0.143]	(0.185,0.202]	5254	0.000340277	0.0759549	0.14	0.19
ukb_neale1	(0.129,0.143]	(0.202,0.219]	3634	0.000297315	0.0668772	0.14	0.21
ukb_neale1	(0.129,0.143]	(0.219,0.23]	2360	-0.000214902	-0.0413517	0.14	0.22
ukb_neale1	(0.129,0.143]	(0.23,0.25]	1900	0.00101353	0.218209	0.14	0.24
ukb_neale1	(0.129,0.143]	(0.25,0.265]	656	0.0014988	0.320746	0.14	0.26
ukb_neale1	(0.129,0.143]	(0.265,0.281]	499	0.001448	0.310011	0.14	0.27
ukb_neale1	(0.129,0.143]	(0.281,0.298]	184	0.000271742	0.0614738	0.14	0.29
ukb_neale1	(0.129,0.143]	(0.298,0.316]	105	-0.000348287	-0.0695354	0.14	0.31
ukb_neale1	(0.129,0.143]	(0.316,0.337]	54	-0.00145068	-0.302466	0.14	0.33
ukb_neale1	(0.129,0.143]	(0.337,0.352]	43	-0.00779242	-1.64244	0.14	0.34
ukb_neale1	(0.129,0.143]	(0.352,0.371]	1	0.0174791	3.69731	0.14	0.36
ukb_neale1	(0.129,0.143]	(0.371,0.388]	13	0.00329079	0.699385	0.14	0.38
ukb_neale1	(0.129,0.143]	(0.388,0.408]	9	0.00534682	1.13381	0.14	0.4
ukb_neale1	(0.129,0.143]	(0.408,0.427]	1	0.00672418	1.42484	0.14	0.42
ukb_neale1	(0.143,0.157]	[0,0.0459]	228	-0.000276858	-0.0544427	0.15	0.02
ukb_neale1	(0.143,0.157]	(0.0459,0.0618]	1122	-0.000870843	-0.179949	0.15	0.05
ukb_neale1	(0.143,0.157]	(0.0618,0.0765]	2233	0.000157896	0.0374187	0.15	0.07
ukb_neale1	(0.143,0.157]	(0.0765,0.0899]	2563	0.000270801	0.0612749	0.15	0.08
ukb_neale1	(0.143,0.157]	(0.0899,0.101]	3932	-0.000235812	-0.04577	0.15	0.1
ukb_neale1	(0.143,0.157]	(0.101,0.112]	7637	2.646e-05	0.00964686	0.15	0.11
ukb_neale1	(0.143,0.157]	(0.112,0.129]	9636	0.000198422	0.0459817	0.15	0.12
ukb_neale1	(0.143,0.157]	(0.129,0.143]	9844	-1.28975e-05	0.00133082	0.15	0.14
ukb_neale1	(0.143,0.157]	(0.143,0.157]	8272	-0.000216717	-0.0417353	0.15	0.15
ukb_neale1	(0.143,0.157]	(0.157,0.169]	10434	-0.000270027	-0.0529994	0.15	0.16
ukb_neale1	(0.143,0.157]	(0.169,0.185]	9173	-0.000178146	-0.0335854	0.15	0.18
ukb_neale1	(0.143,0.157]	(0.185,0.202]	7759	2.76004e-05	0.00988783	0.15	0.19
ukb_neale1	(0.143,0.157]	(0.202,0.219]	5799	6.62037e-05	0.0180445	0.15	0.21
ukb_neale1	(0.143,0.157]	(0.219,0.23]	4248	-0.000399464	-0.0803488	0.15	0.22
ukb_neale1	(0.143,0.157]	(0.23,0.25]	3387	0.000369814	0.0821958	0.15	0.24
ukb_neale1	(0.143,0.157]	(0.25,0.265]	1621	0.00010367	0.0259611	0.15	0.26
ukb_neale1	(0.143,0.157]	(0.265,0.281]	799	5.79028e-05	0.0162906	0.15	0.27
ukb_neale1	(0.143,0.157]	(0.281,0.298]	521	0.000456769	0.100569	0.15	0.29
ukb_neale1	(0.143,0.157]	(0.298,0.316]	205	-0.000602625	-0.123276	0.15	0.31
ukb_neale1	(0.143,0.157]	(0.316,0.337]	100	-0.000272812	-0.053588	0.15	0.33
ukb_neale1	(0.143,0.157]	(0.337,0.352]	28	-0.000659993	-0.135397	0.15	0.34
ukb_neale1	(0.143,0.157]	(0.352,0.371]	20	0.00140943	0.301862	0.15	0.36
ukb_neale1	(0.143,0.157]	(0.371,0.388]	15	0.0031001	0.659092	0.15	0.38
ukb_neale1	(0.143,0.157]	(0.388,0.408]	16	0.0036648	0.778411	0.15	0.4
ukb_neale1	(0.143,0.157]	(0.408,0.427]	30	0.00603178	1.27854	0.15	0.42
ukb_neale1	(0.143,0.157]	(0.427,0.444]	13	0.00602265	1.27661	0.15	0.44
ukb_neale1	(0.143,0.157]	(0.444,0.464]	5	0.00571953	1.21257	0.15	0.45
ukb_neale1	(0.157,0.169]	[0,0.0459]	85	0.00127168	0.272757	0.16	0.02
ukb_neale1	(0.157,0.169]	(0.0459,0.0618]	415	0.000887135	0.191503	0.16	0.05
ukb_neale1	(0.157,0.169]	(0.0618,0.0765]	803	-8.92911e-05	-0.0148108	0.16	0.07
ukb_neale1	(0.157,0.169]	(0.0765,0.0899]	1095	0.000142356	0.0341351	0.16	0.08
ukb_neale1	(0.157,0.169]	(0.0899,0.101]	1695	-0.000200559	-0.0383213	0.16	0.1
ukb_neale1	(0.157,0.169]	(0.101,0.112]	3537	0.000210678	0.0485712	0.16	0.11
ukb_neale1	(0.157,0.169]	(0.112,0.129]	4885	0.000126601	0.0308062	0.16	0.12
ukb_neale1	(0.157,0.169]	(0.129,0.143]	5599	-0.000215506	-0.0414795	0.16	0.14
ukb_neale1	(0.157,0.169]	(0.143,0.157]	5276	-0.000298618	-0.0590406	0.16	0.15
ukb_neale1	(0.157,0.169]	(0.157,0.169]	7319	-0.000188772	-0.0358307	0.16	0.16
ukb_neale1	(0.157,0.169]	(0.169,0.185]	6756	-0.000121648	-0.0216476	0.16	0.18
ukb_neale1	(0.157,0.169]	(0.185,0.202]	6261	-8.53335e-06	0.00225293	0.16	0.19
ukb_neale1	(0.157,0.169]	(0.202,0.219]	4707	9.28143e-05	0.0236672	0.16	0.21
ukb_neale1	(0.157,0.169]	(0.219,0.23]	3773	-0.000111335	-0.0194686	0.16	0.22
ukb_neale1	(0.157,0.169]	(0.23,0.25]	3327	0.000232171	0.0531126	0.16	0.24
ukb_neale1	(0.157,0.169]	(0.25,0.265]	1533	0.000499138	0.109521	0.16	0.26
ukb_neale1	(0.157,0.169]	(0.265,0.281]	896	-0.000339517	-0.0676823	0.16	0.27
ukb_neale1	(0.157,0.169]	(0.281,0.298]	669	-5.11037e-05	-0.00674198	0.16	0.29
ukb_neale1	(0.157,0.169]	(0.298,0.316]	444	0.00127961	0.274431	0.16	0.31
ukb_neale1	(0.157,0.169]	(0.316,0.337]	161	-0.000336926	-0.0671348	0.16	0.33
ukb_neale1	(0.157,0.169]	(0.337,0.352]	58	0.00107595	0.231399	0.16	0.34
ukb_neale1	(0.157,0.169]	(0.352,0.371]	30	0.000463133	0.101914	0.16	0.36
ukb_neale1	(0.157,0.169]	(0.371,0.388]	10	0.00159497	0.341065	0.16	0.38
ukb_neale1	(0.157,0.169]	(0.388,0.408]	6	0.00692214	1.46667	0.16	0.4
ukb_neale1	(0.157,0.169]	(0.408,0.427]	1	0.00421883	0.895475	0.16	0.42
ukb_neale1	(0.157,0.169]	(0.427,0.444]	2	0.00323458	0.687508	0.16	0.44
ukb_neale1	(0.157,0.169]	(0.444,0.464]	5	0.00510918	1.0836	0.16	0.45
ukb_neale1	(0.157,0.169]	(0.464,0.483]	11	0.00289177	0.615073	0.16	0.47
ukb_neale1	(0.157,0.169]	(0.483,0.5]	4	0.00567016	1.20213	0.16	0.49
ukb_neale1	(0.169,0.185]	[0,0.0459]	48	0.000181776	0.0424645	0.18	0.02
ukb_neale1	(0.169,0.185]	(0.0459,0.0618]	263	0.00245078	0.521894	0.18	0.05
ukb_neale1	(0.169,0.185]	(0.0618,0.0765]	682	0.000165313	0.0389859	0.18	0.07
ukb_neale1	(0.169,0.185]	(0.0765,0.0899]	878	-0.000287057	-0.0565977	0.18	0.08
ukb_neale1	(0.169,0.185]	(0.0899,0.101]	1549	-0.00028148	-0.0554195	0.18	0.1
ukb_neale1	(0.169,0.185]	(0.101,0.112]	3166	0.000124588	0.0303808	0.18	0.11
ukb_neale1	(0.169,0.185]	(0.112,0.129]	5239	-0.000194954	-0.0371368	0.18	0.12
ukb_neale1	(0.169,0.185]	(0.129,0.143]	7028	-0.000166936	-0.0312169	0.18	0.14
ukb_neale1	(0.169,0.185]	(0.143,0.157]	6349	-0.000185836	-0.0352102	0.18	0.15
ukb_neale1	(0.169,0.185]	(0.157,0.169]	10091	-6.57004e-05	-0.0098262	0.18	0.16
ukb_neale1	(0.169,0.185]	(0.169,0.185]	10095	-6.96566e-05	-0.0106621	0.18	0.18
ukb_neale1	(0.169,0.185]	(0.185,0.202]	9176	0.000135757	0.0327408	0.18	0.19
ukb_neale1	(0.169,0.185]	(0.202,0.219]	8705	-0.0001183	-0.0209403	0.18	0.21
ukb_neale1	(0.169,0.185]	(0.219,0.23]	6911	0.000219455	0.0504257	0.18	0.22
ukb_neale1	(0.169,0.185]	(0.23,0.25]	6729	4.97095e-05	0.0145594	0.18	0.24
ukb_neale1	(0.169,0.185]	(0.25,0.265]	3549	0.000533748	0.116834	0.18	0.26
ukb_neale1	(0.169,0.185]	(0.265,0.281]	2456	0.000913301	0.197032	0.18	0.27
ukb_neale1	(0.169,0.185]	(0.281,0.298]	1413	0.00012761	0.0310193	0.18	0.29
ukb_neale1	(0.169,0.185]	(0.298,0.316]	1067	-0.000419491	-0.0845804	0.18	0.31
ukb_neale1	(0.169,0.185]	(0.316,0.337]	453	0.000806751	0.174519	0.18	0.33
ukb_neale1	(0.169,0.185]	(0.337,0.352]	168	0.00725273	1.53652	0.18	0.34
ukb_neale1	(0.169,0.185]	(0.352,0.371]	50	0.00334902	0.711688	0.18	0.36
ukb_neale1	(0.169,0.185]	(0.371,0.388]	34	0.000322755	0.0722525	0.18	0.38
ukb_neale1	(0.169,0.185]	(0.388,0.408]	41	0.0013327	0.28565	0.18	0.4
ukb_neale1	(0.169,0.185]	(0.408,0.427]	8	0.00367874	0.781356	0.18	0.42
ukb_neale1	(0.169,0.185]	(0.427,0.444]	19	0.00165627	0.354017	0.18	0.44
ukb_neale1	(0.169,0.185]	(0.444,0.464]	8	0.00158236	0.338401	0.18	0.45
ukb_neale1	(0.185,0.202]	[0,0.0459]	6	-0.0011568	-0.240371	0.19	0.02
ukb_neale1	(0.185,0.202]	(0.0459,0.0618]	80	-0.000297259	-0.0587533	0.19	0.05
ukb_neale1	(0.185,0.202]	(0.0618,0.0765]	237	0.000452438	0.099654	0.19	0.07
ukb_neale1	(0.185,0.202]	(0.0765,0.0899]	318	-8.13092e-06	0.00233797	0.19	0.08
ukb_neale1	(0.185,0.202]	(0.0899,0.101]	746	-5.49002e-05	-0.00754415	0.19	0.1
ukb_neale1	(0.185,0.202]	(0.101,0.112]	1526	0.000161648	0.0382114	0.19	0.11
ukb_neale1	(0.185,0.202]	(0.112,0.129]	2590	-1.95052e-06	0.00364385	0.19	0.12
ukb_neale1	(0.185,0.202]	(0.129,0.143]	3635	0.000169108	0.0397877	0.19	0.14
ukb_neale1	(0.185,0.202]	(0.143,0.157]	3858	2.20037e-05	0.00870527	0.19	0.15
ukb_neale1	(0.185,0.202]	(0.157,0.169]	6528	-0.000137261	-0.0249465	0.19	0.16
ukb_neale1	(0.185,0.202]	(0.169,0.185]	6687	-0.000227041	-0.0439167	0.19	0.18
ukb_neale1	(0.185,0.202]	(0.185,0.202]	6986	-0.000244207	-0.0475438	0.19	0.19
ukb_neale1	(0.185,0.202]	(0.202,0.219]	7011	-0.000158403	-0.0294139	0.19	0.21
ukb_neale1	(0.185,0.202]	(0.219,0.23]	6106	-0.000186476	-0.0353454	0.19	0.22
ukb_neale1	(0.185,0.202]	(0.23,0.25]	6291	0.000113117	0.027957	0.19	0.24
ukb_neale1	(0.185,0.202]	(0.25,0.265]	3536	4.22543e-05	0.0129841	0.19	0.26
ukb_neale1	(0.185,0.202]	(0.265,0.281]	2425	-0.000161403	-0.0300477	0.19	0.27
ukb_neale1	(0.185,0.202]	(0.281,0.298]	1621	-0.000371984	-0.0745424	0.19	0.29
ukb_neale1	(0.185,0.202]	(0.298,0.316]	1340	0.000237475	0.0542334	0.19	0.31
ukb_neale1	(0.185,0.202]	(0.316,0.337]	695	0.000327032	0.0731563	0.19	0.33
ukb_neale1	(0.185,0.202]	(0.337,0.352]	239	0.00116299	0.24979	0.19	0.34
ukb_neale1	(0.185,0.202]	(0.352,0.371]	204	0.00091875	0.198184	0.19	0.36
ukb_neale1	(0.185,0.202]	(0.371,0.388]	79	0.00115874	0.248892	0.19	0.38
ukb_neale1	(0.185,0.202]	(0.388,0.408]	39	0.00282626	0.601231	0.19	0.4
ukb_neale1	(0.185,0.202]	(0.408,0.427]	13	0.000347064	0.077389	0.19	0.42
ukb_neale1	(0.185,0.202]	(0.427,0.444]	7	0.000808326	0.174852	0.19	0.44
ukb_neale1	(0.185,0.202]	(0.444,0.464]	5	0.00117621	0.252583	0.19	0.45
ukb_neale1	(0.185,0.202]	(0.464,0.483]	2	0.0069352	1.46943	0.19	0.47
ukb_neale1	(0.202,0.219]	[0,0.0459]	12	0.0173612	3.67239	0.21	0.02
ukb_neale1	(0.202,0.219]	(0.0459,0.0618]	28	0.00165367	0.35347	0.21	0.05
ukb_neale1	(0.202,0.219]	(0.0618,0.0765]	191	-0.000573677	-0.117159	0.21	0.07
ukb_neale1	(0.202,0.219]	(0.0765,0.0899]	333	-0.00107592	-0.223281	0.21	0.08
ukb_neale1	(0.202,0.219]	(0.0899,0.101]	477	-0.00132207	-0.275291	0.21	0.1
ukb_neale1	(0.202,0.219]	(0.101,0.112]	1254	6.20741e-05	0.017172	0.21	0.11
ukb_neale1	(0.202,0.219]	(0.112,0.129]	2355	-0.000479815	-0.0973267	0.21	0.12
ukb_neale1	(0.202,0.219]	(0.129,0.143]	3373	2.72196e-05	0.00980737	0.21	0.14
ukb_neale1	(0.202,0.219]	(0.143,0.157]	3982	-0.000157025	-0.0291227	0.21	0.15
ukb_neale1	(0.202,0.219]	(0.157,0.169]	6643	-3.54059e-05	-0.00342511	0.21	0.16
ukb_neale1	(0.202,0.219]	(0.169,0.185]	7978	-0.000246102	-0.0479442	0.21	0.18
ukb_neale1	(0.202,0.219]	(0.185,0.202]	8994	-0.000122526	-0.0218331	0.21	0.19
ukb_neale1	(0.202,0.219]	(0.202,0.219]	8888	-0.000144657	-0.0265094	0.21	0.21
ukb_neale1	(0.202,0.219]	(0.219,0.23]	8588	0.000176488	0.0413471	0.21	0.22
ukb_neale1	(0.202,0.219]	(0.23,0.25]	9706	3.41538e-05	0.0112725	0.21	0.24
ukb_neale1	(0.202,0.219]	(0.25,0.265]	6067	-8.91611e-05	-0.0147833	0.21	0.26
ukb_neale1	(0.202,0.219]	(0.265,0.281]	4474	6.41729e-05	0.0176154	0.21	0.27
ukb_neale1	(0.202,0.219]	(0.281,0.298]	3306	-0.000241794	-0.0470338	0.21	0.29
ukb_neale1	(0.202,0.219]	(0.298,0.316]	2775	5.72136e-05	0.0161449	0.21	0.31
ukb_neale1	(0.202,0.219]	(0.316,0.337]	1500	-7.46522e-05	-0.0117177	0.21	0.33
ukb_neale1	(0.202,0.219]	(0.337,0.352]	671	-5.18625e-05	-0.00690231	0.21	0.34
ukb_neale1	(0.202,0.219]	(0.352,0.371]	394	-0.000496885	-0.100933	0.21	0.36
ukb_neale1	(0.202,0.219]	(0.371,0.388]	280	0.00156477	0.334685	0.21	0.38
ukb_neale1	(0.202,0.219]	(0.388,0.408]	204	0.00304663	0.647793	0.21	0.4
ukb_neale1	(0.202,0.219]	(0.408,0.427]	38	0.00017273	0.0405531	0.21	0.42
ukb_neale1	(0.202,0.219]	(0.427,0.444]	49	0.000125506	0.0305747	0.21	0.44
ukb_neale1	(0.202,0.219]	(0.444,0.464]	10	-0.0025883	-0.54284	0.21	0.45
ukb_neale1	(0.202,0.219]	(0.464,0.483]	3	0.00036735	0.0816753	0.21	0.47
ukb_neale1	(0.219,0.23]	[0,0.0459]	4	-0.00021548	-0.0414739	0.22	0.02
ukb_neale1	(0.219,0.23]	(0.0459,0.0618]	5	-0.00093288	-0.193057	0.22	0.05
ukb_neale1	(0.219,0.23]	(0.0618,0.0765]	49	0.00114852	0.246733	0.22	0.07
ukb_neale1	(0.219,0.23]	(0.0765,0.0899]	79	0.00104125	0.224067	0.22	0.08
ukb_neale1	(0.219,0.23]	(0.0899,0.101]	151	0.000773289	0.167448	0.22	0.1
ukb_neale1	(0.219,0.23]	(0.101,0.112]	871	0.000749658	0.162455	0.22	0.11
ukb_neale1	(0.219,0.23]	(0.112,0.129]	1337	-6.05168e-07	0.00392812	0.22	0.12
ukb_neale1	(0.219,0.23]	(0.129,0.143]	2100	-0.000103685	-0.0178523	0.22	0.14
ukb_neale1	(0.219,0.23]	(0.143,0.157]	2442	0.000568866	0.124255	0.22	0.15
ukb_neale1	(0.219,0.23]	(0.157,0.169]	4271	-0.000111023	-0.0194027	0.22	0.16
ukb_neale1	(0.219,0.23]	(0.169,0.185]	6072	8.25882e-05	0.0215065	0.22	0.18
ukb_neale1	(0.219,0.23]	(0.185,0.202]	7282	-0.000216834	-0.0417601	0.22	0.19
ukb_neale1	(0.219,0.23]	(0.202,0.219]	7556	-0.000132227	-0.0238829	0.22	0.21
ukb_neale1	(0.219,0.23]	(0.219,0.23]	7712	-0.000229054	-0.044342	0.22	0.22
ukb_neale1	(0.219,0.23]	(0.23,0.25]	9709	2.31498e-05	0.00894742	0.22	0.24
ukb_neale1	(0.219,0.23]	(0.25,0.265]	6257	5.75532e-05	0.0162167	0.22	0.26
ukb_neale1	(0.219,0.23]	(0.265,0.281]	5126	0.000183434	0.0428147	0.22	0.27
ukb_neale1	(0.219,0.23]	(0.281,0.298]	3745	0.000167578	0.0394645	0.22	0.29
ukb_neale1	(0.219,0.23]	(0.298,0.316]	3871	0.000176289	0.0413049	0.22	0.31
ukb_neale1	(0.219,0.23]	(0.316,0.337]	2059	9.14624e-05	0.0233816	0.22	0.33
ukb_neale1	(0.219,0.23]	(0.337,0.352]	959	0.000360171	0.0801585	0.22	0.34
ukb_neale1	(0.219,0.23]	(0.352,0.371]	489	-0.000334894	-0.0667055	0.22	0.36
ukb_neale1	(0.219,0.23]	(0.371,0.388]	353	0.00051361	0.112579	0.22	0.38
ukb_neale1	(0.219,0.23]	(0.388,0.408]	279	0.00103584	0.222925	0.22	0.4
ukb_neale1	(0.219,0.23]	(0.408,0.427]	54	-0.000645288	-0.13229	0.22	0.42
ukb_neale1	(0.219,0.23]	(0.427,0.444]	53	-0.000581831	-0.118882	0.22	0.44
ukb_neale1	(0.219,0.23]	(0.444,0.464]	27	9.76247e-05	0.0246836	0.22	0.45
ukb_neale1	(0.219,0.23]	(0.464,0.483]	7	0.00391047	0.83032	0.22	0.47
ukb_neale1	(0.23,0.25]	(0.0459,0.0618]	26	-0.00124023	-0.257999	0.24	0.05
ukb_neale1	(0.23,0.25]	(0.0618,0.0765]	45	0.00715588	1.51606	0.24	0.07
ukb_neale1	(0.23,0.25]	(0.0765,0.0899]	35	-0.00560741	-1.18076	0.24	0.08
ukb_neale1	(0.23,0.25]	(0.0899,0.101]	83	0.000534555	0.117005	0.24	0.1
ukb_neale1	(0.23,0.25]	(0.101,0.112]	325	0.0014564	0.311787	0.24	0.11
ukb_neale1	(0.23,0.25]	(0.112,0.129]	664	0.00029038	0.065412	0.24	0.12
ukb_neale1	(0.23,0.25]	(0.129,0.143]	1200	-0.000552361	-0.112655	0.24	0.14
ukb_neale1	(0.23,0.25]	(0.143,0.157]	1599	0.000497421	0.109159	0.24	0.15
ukb_neale1	(0.23,0.25]	(0.157,0.169]	3082	8.81819e-05	0.0226884	0.24	0.16
ukb_neale1	(0.23,0.25]	(0.169,0.185]	4628	-0.000122085	-0.02174	0.24	0.18
ukb_neale1	(0.23,0.25]	(0.185,0.202]	6075	0.000121301	0.0296863	0.24	0.19
ukb_neale1	(0.23,0.25]	(0.202,0.219]	7254	-3.2525e-05	-0.00281639	0.24	0.21
ukb_neale1	(0.23,0.25]	(0.219,0.23]	7832	1.23201e-05	0.00665917	0.24	0.22
ukb_neale1	(0.23,0.25]	(0.23,0.25]	11034	-0.00016163	-0.0300957	0.24	0.24
ukb_neale1	(0.23,0.25]	(0.25,0.265]	8186	0.000217709	0.0500568	0.24	0.26
ukb_neale1	(0.23,0.25]	(0.265,0.281]	6501	0.000175945	0.0412323	0.24	0.27
ukb_neale1	(0.23,0.25]	(0.281,0.298]	5869	-4.87329e-05	-0.00624105	0.24	0.29
ukb_neale1	(0.23,0.25]	(0.298,0.316]	5704	0.000224368	0.0514639	0.24	0.31
ukb_neale1	(0.23,0.25]	(0.316,0.337]	3618	-0.000269043	-0.0527916	0.24	0.33
ukb_neale1	(0.23,0.25]	(0.337,0.352]	1869	0.000178637	0.0418012	0.24	0.34
ukb_neale1	(0.23,0.25]	(0.352,0.371]	1315	0.000286652	0.0646241	0.24	0.36
ukb_neale1	(0.23,0.25]	(0.371,0.388]	869	-2.04952e-05	-0.000274554	0.24	0.38
ukb_neale1	(0.23,0.25]	(0.388,0.408]	516	0.000126259	0.0307339	0.24	0.4
ukb_neale1	(0.23,0.25]	(0.408,0.427]	191	0.000441559	0.0973553	0.24	0.42
ukb_neale1	(0.23,0.25]	(0.427,0.444]	82	0.0019643	0.419103	0.24	0.44
ukb_neale1	(0.23,0.25]	(0.444,0.464]	30	-0.00144762	-0.301819	0.24	0.45
ukb_neale1	(0.23,0.25]	(0.464,0.483]	8	-0.00143425	-0.298995	0.24	0.47
ukb_neale1	(0.23,0.25]	(0.483,0.5]	8	0.00467883	0.99267	0.24	0.49
ukb_neale1	(0.25,0.265]	[0,0.0459]	1	-0.00189793	-0.396968	0.26	0.02
ukb_neale1	(0.25,0.265]	(0.0459,0.0618]	14	-0.00119542	-0.24853	0.26	0.05
ukb_neale1	(0.25,0.265]	(0.0618,0.0765]	5	0.00311424	0.66208	0.26	0.07
ukb_neale1	(0.25,0.265]	(0.0765,0.0899]	26	-0.00926706	-1.95403	0.26	0.08
ukb_neale1	(0.25,0.265]	(0.0899,0.101]	40	-0.00132248	-0.275377	0.26	0.1
ukb_neale1	(0.25,0.265]	(0.101,0.112]	187	2.50848e-05	0.00935629	0.26	0.11
ukb_neale1	(0.25,0.265]	(0.112,0.129]	452	0.000303693	0.0682249	0.26	0.12
ukb_neale1	(0.25,0.265]	(0.129,0.143]	644	0.000451409	0.0994365	0.26	0.14
ukb_neale1	(0.25,0.265]	(0.143,0.157]	1067	-0.000673949	-0.138346	0.26	0.15
ukb_neale1	(0.25,0.265]	(0.157,0.169]	2118	-0.000554792	-0.113169	0.26	0.16
ukb_neale1	(0.25,0.265]	(0.169,0.185]	3025	7.72713e-05	0.020383	0.26	0.18
ukb_neale1	(0.25,0.265]	(0.185,0.202]	4277	-8.19826e-05	-0.0132665	0.26	0.19
ukb_neale1	(0.25,0.265]	(0.202,0.219]	5613	3.20235e-05	0.0108224	0.26	0.21
ukb_neale1	(0.25,0.265]	(0.219,0.23]	6996	4.79105e-05	0.0141793	0.26	0.22
ukb_neale1	(0.25,0.265]	(0.23,0.25]	10657	-0.00029341	-0.0579402	0.26	0.24
ukb_neale1	(0.25,0.265]	(0.25,0.265]	7897	6.13247e-05	0.0170136	0.26	0.26
ukb_neale1	(0.25,0.265]	(0.265,0.281]	7097	-2.59408e-05	-0.00142518	0.26	0.27
ukb_neale1	(0.25,0.265]	(0.281,0.298]	6223	6.81032e-05	0.0184459	0.26	0.29
ukb_neale1	(0.25,0.265]	(0.298,0.316]	7492	-0.000192009	-0.0365147	0.26	0.31
ukb_neale1	(0.25,0.265]	(0.316,0.337]	5481	-0.000241496	-0.0469709	0.26	0.33
ukb_neale1	(0.25,0.265]	(0.337,0.352]	2819	-0.000314751	-0.0624493	0.26	0.34
ukb_neale1	(0.25,0.265]	(0.352,0.371]	2192	-0.000209942	-0.0403038	0.26	0.36
ukb_neale1	(0.25,0.265]	(0.371,0.388]	1334	0.000520444	0.114023	0.26	0.38
ukb_neale1	(0.25,0.265]	(0.388,0.408]	1035	-1.34642e-05	0.00121106	0.26	0.4
ukb_neale1	(0.25,0.265]	(0.408,0.427]	345	0.000761589	0.164976	0.26	0.42
ukb_neale1	(0.25,0.265]	(0.427,0.444]	212	0.00197009	0.420326	0.26	0.44
ukb_neale1	(0.25,0.265]	(0.444,0.464]	121	0.000744297	0.161322	0.26	0.45
ukb_neale1	(0.25,0.265]	(0.464,0.483]	36	0.000307832	0.0690994	0.26	0.47
ukb_neale1	(0.25,0.265]	(0.483,0.5]	17	0.000652835	0.141997	0.26	0.49
ukb_neale1	(0.265,0.281]	(0.0618,0.0765]	2	-0.00240855	-0.504859	0.27	0.07
ukb_neale1	(0.265,0.281]	(0.0765,0.0899]	4	-0.00265464	-0.556857	0.27	0.08
ukb_neale1	(0.265,0.281]	(0.0899,0.101]	12	0.000171684	0.0403319	0.27	0.1
ukb_neale1	(0.265,0.281]	(0.101,0.112]	55	0.00124995	0.268164	0.27	0.11
ukb_neale1	(0.265,0.281]	(0.112,0.129]	140	4.71023e-05	0.0140085	0.27	0.12
ukb_neale1	(0.265,0.281]	(0.129,0.143]	347	-0.000772191	-0.159104	0.27	0.14
ukb_neale1	(0.265,0.281]	(0.143,0.157]	566	-0.00064541	-0.132316	0.27	0.15
ukb_neale1	(0.265,0.281]	(0.157,0.169]	1376	0.00022011	0.0505641	0.27	0.16
ukb_neale1	(0.265,0.281]	(0.169,0.185]	2056	-3.19527e-05	-0.00269546	0.27	0.18
ukb_neale1	(0.265,0.281]	(0.185,0.202]	3026	-2.75104e-05	-0.00175683	0.27	0.19
ukb_neale1	(0.265,0.281]	(0.202,0.219]	4126	0.000326523	0.0730488	0.27	0.21
ukb_neale1	(0.265,0.281]	(0.219,0.23]	6075	0.000157858	0.0374106	0.27	0.22
ukb_neale1	(0.265,0.281]	(0.23,0.25]	8946	-0.000199947	-0.0381918	0.27	0.24
ukb_neale1	(0.265,0.281]	(0.25,0.265]	7363	-0.000107965	-0.0187564	0.27	0.26
ukb_neale1	(0.265,0.281]	(0.265,0.281]	7593	-4.43649e-05	-0.00531811	0.27	0.27
ukb_neale1	(0.265,0.281]	(0.281,0.298]	7025	0.000125188	0.0305076	0.27	0.29
ukb_neale1	(0.265,0.281]	(0.298,0.316]	8118	-5.16201e-05	-0.0068511	0.27	0.31
ukb_neale1	(0.265,0.281]	(0.316,0.337]	6780	-2.99431e-05	-0.00227083	0.27	0.33
ukb_neale1	(0.265,0.281]	(0.337,0.352]	3743	-4.75287e-05	-0.00598659	0.27	0.34
ukb_neale1	(0.265,0.281]	(0.352,0.371]	2540	7.06622e-05	0.0189866	0.27	0.36
ukb_neale1	(0.265,0.281]	(0.371,0.388]	1993	-0.000148429	-0.0273064	0.27	0.38
ukb_neale1	(0.265,0.281]	(0.388,0.408]	1774	0.0002145	0.0493789	0.27	0.4
ukb_neale1	(0.265,0.281]	(0.408,0.427]	690	-0.0002264	-0.0437813	0.27	0.42
ukb_neale1	(0.265,0.281]	(0.427,0.444]	399	0.000659434	0.143391	0.27	0.44
ukb_neale1	(0.265,0.281]	(0.444,0.464]	173	0.000731393	0.158596	0.27	0.45
ukb_neale1	(0.265,0.281]	(0.464,0.483]	71	-0.00111836	-0.232248	0.27	0.47
ukb_neale1	(0.265,0.281]	(0.483,0.5]	59	-8.7048e-05	-0.0143368	0.27	0.49
ukb_neale1	(0.281,0.298]	[0,0.0459]	1	0.00018712	0.0435936	0.29	0.02
ukb_neale1	(0.281,0.298]	(0.0459,0.0618]	2	7.54142e-05	0.0199907	0.29	0.05
ukb_neale1	(0.281,0.298]	(0.0899,0.101]	8	-0.00185551	-0.388004	0.29	0.1
ukb_neale1	(0.281,0.298]	(0.101,0.112]	72	0.00960808	2.0342	0.29	0.11
ukb_neale1	(0.281,0.298]	(0.112,0.129]	77	0.0015535	0.332304	0.29	0.12
ukb_neale1	(0.281,0.298]	(0.129,0.143]	220	-0.000757206	-0.155938	0.29	0.14
ukb_neale1	(0.281,0.298]	(0.143,0.157]	324	0.000222239	0.051014	0.29	0.15
ukb_neale1	(0.281,0.298]	(0.157,0.169]	642	-0.000370573	-0.0742444	0.29	0.16
ukb_neale1	(0.281,0.298]	(0.169,0.185]	1275	-0.000471098	-0.0954848	0.29	0.18
ukb_neale1	(0.281,0.298]	(0.185,0.202]	2106	0.000306109	0.0687353	0.29	0.19
ukb_neale1	(0.281,0.298]	(0.202,0.219]	3101	-0.000190247	-0.0361424	0.29	0.21
ukb_neale1	(0.281,0.298]	(0.219,0.23]	4081	0.000397775	0.088104	0.29	0.22
ukb_neale1	(0.281,0.298]	(0.23,0.25]	7247	-4.62894e-05	-0.00572473	0.29	0.24
ukb_neale1	(0.281,0.298]	(0.25,0.265]	6744	-0.000363901	-0.0728346	0.29	0.26
ukb_neale1	(0.281,0.298]	(0.265,0.281]	7263	-8.19414e-05	-0.0132578	0.29	0.27
ukb_neale1	(0.281,0.298]	(0.281,0.298]	7160	-9.16526e-05	-0.0153098	0.29	0.29
ukb_neale1	(0.281,0.298]	(0.298,0.316]	9492	-0.000310702	-0.0615939	0.29	0.31
ukb_neale1	(0.281,0.298]	(0.316,0.337]	7697	-6.46458e-06	0.00269006	0.29	0.33
ukb_neale1	(0.281,0.298]	(0.337,0.352]	4533	-5.58634e-05	-0.00774768	0.29	0.34
ukb_neale1	(0.281,0.298]	(0.352,0.371]	4207	-0.000440821	-0.0890873	0.29	0.36
ukb_neale1	(0.281,0.298]	(0.371,0.388]	3267	0.000213043	0.049071	0.29	0.38
ukb_neale1	(0.281,0.298]	(0.388,0.408]	2545	9.79537e-06	0.0061257	0.29	0.4
ukb_neale1	(0.281,0.298]	(0.408,0.427]	1044	-0.000265799	-0.0521061	0.29	0.42
ukb_neale1	(0.281,0.298]	(0.427,0.444]	887	-0.000496512	-0.100855	0.29	0.44
ukb_neale1	(0.281,0.298]	(0.444,0.464]	493	-0.000113465	-0.0199187	0.29	0.45
ukb_neale1	(0.281,0.298]	(0.464,0.483]	189	0.000100441	0.0252787	0.29	0.47
ukb_neale1	(0.281,0.298]	(0.483,0.5]	164	0.000747409	0.16198	0.29	0.49
ukb_neale1	(0.298,0.316]	(0.0459,0.0618]	3	0.000758266	0.164274	0.31	0.05
ukb_neale1	(0.298,0.316]	(0.0618,0.0765]	1	-0.00602317	-1.26861	0.31	0.07
ukb_neale1	(0.298,0.316]	(0.0899,0.101]	2	0.000536548	0.117426	0.31	0.1
ukb_neale1	(0.298,0.316]	(0.101,0.112]	3	-0.00184593	-0.38598	0.31	0.11
ukb_neale1	(0.298,0.316]	(0.112,0.129]	19	-0.00136325	-0.283991	0.31	0.12
ukb_neale1	(0.298,0.316]	(0.129,0.143]	50	0.000233488	0.053391	0.31	0.14
ukb_neale1	(0.298,0.316]	(0.143,0.157]	103	0.000382851	0.0849506	0.31	0.15
ukb_neale1	(0.298,0.316]	(0.157,0.169]	337	-0.00131425	-0.273638	0.31	0.16
ukb_neale1	(0.298,0.316]	(0.169,0.185]	623	-2.79724e-05	-0.00185445	0.31	0.18
ukb_neale1	(0.298,0.316]	(0.185,0.202]	1184	4.22156e-05	0.012976	0.31	0.19
ukb_neale1	(0.298,0.316]	(0.202,0.219]	1971	-0.000599456	-0.122606	0.31	0.21
ukb_neale1	(0.298,0.316]	(0.219,0.23]	3006	0.000111396	0.0275934	0.31	0.22
ukb_neale1	(0.298,0.316]	(0.23,0.25]	5629	0.000464106	0.102119	0.31	0.24
ukb_neale1	(0.298,0.316]	(0.25,0.265]	5356	-0.00020442	-0.0391369	0.31	0.26
ukb_neale1	(0.298,0.316]	(0.265,0.281]	6938	0.000156168	0.0370536	0.31	0.27
ukb_neale1	(0.298,0.316]	(0.281,0.298]	7169	0.000171363	0.0402642	0.31	0.29
ukb_neale1	(0.298,0.316]	(0.298,0.316]	9740	-0.000296146	-0.0585183	0.31	0.31
ukb_neale1	(0.298,0.316]	(0.316,0.337]	9004	2.20271e-05	0.00871021	0.31	0.33
ukb_neale1	(0.298,0.316]	(0.337,0.352]	6009	-8.31863e-05	-0.0135209	0.31	0.34
ukb_neale1	(0.298,0.316]	(0.352,0.371]	4881	0.000117701	0.0289255	0.31	0.36
ukb_neale1	(0.298,0.316]	(0.371,0.388]	4389	-0.000431084	-0.08703	0.31	0.38
ukb_neale1	(0.298,0.316]	(0.388,0.408]	4336	-0.000136635	-0.0248143	0.31	0.4
ukb_neale1	(0.298,0.316]	(0.408,0.427]	1723	-0.000407773	-0.0821045	0.31	0.42
ukb_neale1	(0.298,0.316]	(0.427,0.444]	1064	-0.000214588	-0.0412854	0.31	0.44
ukb_neale1	(0.298,0.316]	(0.444,0.464]	1033	-0.000309557	-0.0613519	0.31	0.45
ukb_neale1	(0.298,0.316]	(0.464,0.483]	478	-7.28718e-05	-0.0113415	0.31	0.47
ukb_neale1	(0.298,0.316]	(0.483,0.5]	275	-0.000245406	-0.0477971	0.31	0.49
ukb_neale1	(0.316,0.337]	(0.0459,0.0618]	1	-0.000262179	-0.0513412	0.33	0.05
ukb_neale1	(0.316,0.337]	(0.101,0.112]	1	-0.00243793	-0.511067	0.33	0.11
ukb_neale1	(0.316,0.337]	(0.112,0.129]	27	-0.00322828	-0.678065	0.33	0.12
ukb_neale1	(0.316,0.337]	(0.129,0.143]	29	-0.000708409	-0.145627	0.33	0.14
ukb_neale1	(0.316,0.337]	(0.143,0.157]	144	-0.000617319	-0.126381	0.33	0.15
ukb_neale1	(0.316,0.337]	(0.157,0.169]	192	-7.52031e-05	-0.0118341	0.33	0.16
ukb_neale1	(0.316,0.337]	(0.169,0.185]	369	4.34578e-05	0.0132384	0.33	0.18
ukb_neale1	(0.316,0.337]	(0.185,0.202]	610	-0.000893089	-0.184649	0.33	0.19
ukb_neale1	(0.316,0.337]	(0.202,0.219]	1150	-0.000152643	-0.0281968	0.33	0.21
ukb_neale1	(0.316,0.337]	(0.219,0.23]	1851	0.000264242	0.0598891	0.33	0.22
ukb_neale1	(0.316,0.337]	(0.23,0.25]	3907	0.000218427	0.0502087	0.33	0.24
ukb_neale1	(0.316,0.337]	(0.25,0.265]	4239	3.74288e-06	0.00484684	0.33	0.26
ukb_neale1	(0.316,0.337]	(0.265,0.281]	5267	-0.000146172	-0.0268295	0.33	0.27
ukb_neale1	(0.316,0.337]	(0.281,0.298]	6098	-4.31412e-05	-0.00505954	0.33	0.29
ukb_neale1	(0.316,0.337]	(0.298,0.316]	8942	-4.73205e-05	-0.00594261	0.33	0.31
ukb_neale1	(0.316,0.337]	(0.316,0.337]	9038	-0.000105991	-0.0183394	0.33	0.33
ukb_neale1	(0.316,0.337]	(0.337,0.352]	6694	5.00209e-06	0.00511291	0.33	0.34
ukb_neale1	(0.316,0.337]	(0.352,0.371]	6037	-0.000172087	-0.0323051	0.33	0.36
ukb_neale1	(0.316,0.337]	(0.371,0.388]	5374	9.25919e-05	0.0236202	0.33	0.38
ukb_neale1	(0.316,0.337]	(0.388,0.408]	5535	0.000159957	0.0378541	0.33	0.4
ukb_neale1	(0.316,0.337]	(0.408,0.427]	2629	0.000371375	0.0825258	0.33	0.42
ukb_neale1	(0.316,0.337]	(0.427,0.444]	2272	0.000510604	0.111944	0.33	0.44
ukb_neale1	(0.316,0.337]	(0.444,0.464]	1421	-0.000142148	-0.0259792	0.33	0.45
ukb_neale1	(0.316,0.337]	(0.464,0.483]	830	0.000544942	0.1192	0.33	0.47
ukb_neale1	(0.316,0.337]	(0.483,0.5]	610	-3.85892e-05	-0.00409772	0.33	0.49
ukb_neale1	(0.337,0.352]	(0.0765,0.0899]	1	-0.00850864	-1.79378	0.34	0.08
ukb_neale1	(0.337,0.352]	(0.0899,0.101]	1	0.00119757	0.257097	0.34	0.1
ukb_neale1	(0.337,0.352]	(0.112,0.129]	4	-0.00150428	-0.313791	0.34	0.12
ukb_neale1	(0.337,0.352]	(0.129,0.143]	10	-0.00980503	-2.0677	0.34	0.14
ukb_neale1	(0.337,0.352]	(0.143,0.157]	37	0.00152745	0.326799	0.34	0.15
ukb_neale1	(0.337,0.352]	(0.157,0.169]	121	0.0033134	0.704161	0.34	0.16
ukb_neale1	(0.337,0.352]	(0.169,0.185]	248	-0.000645518	-0.132339	0.34	0.18
ukb_neale1	(0.337,0.352]	(0.185,0.202]	377	-0.000736707	-0.151607	0.34	0.19
ukb_neale1	(0.337,0.352]	(0.202,0.219]	719	0.000419936	0.0927865	0.34	0.21
ukb_neale1	(0.337,0.352]	(0.219,0.23]	1270	0.000405761	0.0897914	0.34	0.22
ukb_neale1	(0.337,0.352]	(0.23,0.25]	2613	0.000236418	0.0540099	0.34	0.24
ukb_neale1	(0.337,0.352]	(0.25,0.265]	2882	0.000281654	0.0635681	0.34	0.26
ukb_neale1	(0.337,0.352]	(0.265,0.281]	4321	-0.000477797	-0.0969003	0.34	0.27
ukb_neale1	(0.337,0.352]	(0.281,0.298]	4746	-4.59782e-05	-0.00565898	0.34	0.29
ukb_neale1	(0.337,0.352]	(0.298,0.316]	8030	-0.000197302	-0.037633	0.34	0.31
ukb_neale1	(0.337,0.352]	(0.316,0.337]	8844	5.44197e-05	0.0155546	0.34	0.33
ukb_neale1	(0.337,0.352]	(0.337,0.352]	7037	-0.000156312	-0.0289721	0.34	0.34
ukb_neale1	(0.337,0.352]	(0.352,0.371]	6221	-0.000124006	-0.0221458	0.34	0.36
ukb_neale1	(0.337,0.352]	(0.371,0.388]	6382	-0.000277476	-0.0545734	0.34	0.38
ukb_neale1	(0.337,0.352]	(0.388,0.408]	7006	6.92263e-05	0.0186832	0.34	0.4
ukb_neale1	(0.337,0.352]	(0.408,0.427]	3542	-0.000232634	-0.0450985	0.34	0.42
ukb_neale1	(0.337,0.352]	(0.427,0.444]	3100	0.000430956	0.0951149	0.34	0.44
ukb_neale1	(0.337,0.352]	(0.444,0.464]	2475	0.000665849	0.144747	0.34	0.45
ukb_neale1	(0.337,0.352]	(0.464,0.483]	1480	0.000319644	0.0715951	0.34	0.47
ukb_neale1	(0.337,0.352]	(0.483,0.5]	1098	0.000279014	0.0630103	0.34	0.49
ukb_neale1	(0.352,0.371]	[0,0.0459]	2	0.001165	0.250216	0.36	0.02
ukb_neale1	(0.352,0.371]	(0.101,0.112]	1	-0.00252723	-0.529936	0.36	0.11
ukb_neale1	(0.352,0.371]	(0.112,0.129]	1	-0.000923685	-0.191114	0.36	0.12
ukb_neale1	(0.352,0.371]	(0.129,0.143]	13	-0.00258833	-0.542847	0.36	0.14
ukb_neale1	(0.352,0.371]	(0.143,0.157]	15	-0.00223822	-0.468869	0.36	0.15
ukb_neale1	(0.352,0.371]	(0.157,0.169]	20	-0.00069027	-0.141795	0.36	0.16
ukb_neale1	(0.352,0.371]	(0.169,0.185]	85	-0.000203148	-0.0388682	0.36	0.18
ukb_neale1	(0.352,0.371]	(0.185,0.202]	244	-0.00108291	-0.224757	0.36	0.19
ukb_neale1	(0.352,0.371]	(0.202,0.219]	414	0.000725564	0.157364	0.36	0.21
ukb_neale1	(0.352,0.371]	(0.219,0.23]	821	0.000430142	0.0949429	0.36	0.22
ukb_neale1	(0.352,0.371]	(0.23,0.25]	2089	0.000253777	0.057678	0.36	0.24
ukb_neale1	(0.352,0.371]	(0.25,0.265]	2572	-1.37915e-05	0.00114191	0.36	0.26
ukb_neale1	(0.352,0.371]	(0.265,0.281]	3542	0.000107376	0.0267441	0.36	0.27
ukb_neale1	(0.352,0.371]	(0.281,0.298]	4804	-0.000423772	-0.0854851	0.36	0.29
ukb_neale1	(0.352,0.371]	(0.298,0.316]	8389	0.000125057	0.03048	0.36	0.31
ukb_neale1	(0.352,0.371]	(0.316,0.337]	10387	-0.000268434	-0.0526628	0.36	0.33
ukb_neale1	(0.352,0.371]	(0.337,0.352]	8034	-6.54746e-05	-0.00977849	0.36	0.34
ukb_neale1	(0.352,0.371]	(0.352,0.371]	8408	4.68258e-05	0.0139501	0.36	0.36
ukb_neale1	(0.352,0.371]	(0.371,0.388]	9054	1.72033e-05	0.00769097	0.36	0.38
ukb_neale1	(0.352,0.371]	(0.388,0.408]	11386	-1.25478e-05	0.0014047	0.36	0.4
ukb_neale1	(0.352,0.371]	(0.408,0.427]	6033	-0.000198966	-0.0379846	0.36	0.42
ukb_neale1	(0.352,0.371]	(0.427,0.444]	5507	-5.89258e-06	0.00281092	0.36	0.44
ukb_neale1	(0.352,0.371]	(0.444,0.464]	5090	0.000669891	0.145601	0.36	0.45
ukb_neale1	(0.352,0.371]	(0.464,0.483]	3375	0.000393042	0.0871039	0.36	0.47
ukb_neale1	(0.352,0.371]	(0.483,0.5]	2756	-1.51694e-05	0.000850775	0.36	0.49
ukb_neale1	(0.371,0.388]	(0.0618,0.0765]	1	0.00164562	0.351768	0.38	0.07
ukb_neale1	(0.371,0.388]	(0.143,0.157]	1	-0.00228473	-0.478697	0.38	0.15
ukb_neale1	(0.371,0.388]	(0.157,0.169]	10	0.00437196	0.927829	0.38	0.16
ukb_neale1	(0.371,0.388]	(0.169,0.185]	43	0.00146159	0.312884	0.38	0.18
ukb_neale1	(0.371,0.388]	(0.185,0.202]	35	-0.00177192	-0.370342	0.38	0.19
ukb_neale1	(0.371,0.388]	(0.202,0.219]	200	-0.00018533	-0.0351033	0.38	0.21
ukb_neale1	(0.371,0.388]	(0.219,0.23]	316	-0.000518826	-0.105569	0.38	0.22
ukb_neale1	(0.371,0.388]	(0.23,0.25]	863	-0.00026661	-0.0522775	0.38	0.24
ukb_neale1	(0.371,0.388]	(0.25,0.265]	1137	-0.000110327	-0.0192557	0.38	0.26
ukb_neale1	(0.371,0.388]	(0.265,0.281]	1761	0.000635201	0.138271	0.38	0.27
ukb_neale1	(0.371,0.388]	(0.281,0.298]	2630	-7.41967e-05	-0.0116214	0.38	0.29
ukb_neale1	(0.371,0.388]	(0.298,0.316]	4826	-0.000190357	-0.0361655	0.38	0.31
ukb_neale1	(0.371,0.388]	(0.316,0.337]	6388	-0.000109838	-0.0191522	0.38	0.33
ukb_neale1	(0.371,0.388]	(0.337,0.352]	6272	-5.73099e-05	-0.00805332	0.38	0.34
ukb_neale1	(0.371,0.388]	(0.352,0.371]	6384	-3.40914e-05	-0.00314736	0.38	0.36
ukb_neale1	(0.371,0.388]	(0.371,0.388]	7222	0.000120132	0.0294394	0.38	0.38
ukb_neale1	(0.371,0.388]	(0.388,0.408]	9215	2.19264e-05	0.00868894	0.38	0.4
ukb_neale1	(0.371,0.388]	(0.408,0.427]	5784	0.000169057	0.039777	0.38	0.42
ukb_neale1	(0.371,0.388]	(0.427,0.444]	5644	1.29597e-05	0.00679432	0.38	0.44
ukb_neale1	(0.371,0.388]	(0.444,0.464]	5156	-0.000243941	-0.0474875	0.38	0.45
ukb_neale1	(0.371,0.388]	(0.464,0.483]	3694	0.000263083	0.0596441	0.38	0.47
ukb_neale1	(0.371,0.388]	(0.483,0.5]	3500	0.000261501	0.0593099	0.38	0.49
ukb_neale1	(0.388,0.408]	(0.0765,0.0899]	1	0.00200468	0.427635	0.4	0.08
ukb_neale1	(0.388,0.408]	(0.101,0.112]	1	-0.00871566	-1.83752	0.4	0.11
ukb_neale1	(0.388,0.408]	(0.157,0.169]	1	0.00291299	0.619557	0.4	0.16
ukb_neale1	(0.388,0.408]	(0.169,0.185]	13	-0.00752385	-1.5857	0.4	0.18
ukb_neale1	(0.388,0.408]	(0.185,0.202]	37	0.00114697	0.246406	0.4	0.19
ukb_neale1	(0.388,0.408]	(0.202,0.219]	54	0.000501733	0.11007	0.4	0.21
ukb_neale1	(0.388,0.408]	(0.219,0.23]	169	-0.00578025	-1.21728	0.4	0.22
ukb_neale1	(0.388,0.408]	(0.23,0.25]	546	-0.000476019	-0.0965246	0.4	0.24
ukb_neale1	(0.388,0.408]	(0.25,0.265]	789	-0.000117726	-0.020819	0.4	0.26
ukb_neale1	(0.388,0.408]	(0.265,0.281]	1060	-0.000546505	-0.111418	0.4	0.27
ukb_neale1	(0.388,0.408]	(0.281,0.298]	1489	-0.000158583	-0.0294518	0.4	0.29
ukb_neale1	(0.388,0.408]	(0.298,0.316]	3355	-0.000238053	-0.0462435	0.4	0.31
ukb_neale1	(0.388,0.408]	(0.316,0.337]	5019	-0.000184335	-0.0348931	0.4	0.33
ukb_neale1	(0.388,0.408]	(0.337,0.352]	5297	-0.00029691	-0.0586797	0.4	0.34
ukb_neale1	(0.388,0.408]	(0.352,0.371]	5772	-6.07032e-05	-0.0087703	0.4	0.36
ukb_neale1	(0.388,0.408]	(0.371,0.388]	6741	-3.50082e-05	-0.00334109	0.4	0.38
ukb_neale1	(0.388,0.408]	(0.388,0.408]	9299	-0.000144788	-0.0265369	0.4	0.4
ukb_neale1	(0.388,0.408]	(0.408,0.427]	6007	-8.06982e-05	-0.0129952	0.4	0.42
ukb_neale1	(0.388,0.408]	(0.427,0.444]	6727	0.000142103	0.0340816	0.4	0.44
ukb_neale1	(0.388,0.408]	(0.444,0.464]	6851	4.88813e-05	0.0143844	0.4	0.45
ukb_neale1	(0.388,0.408]	(0.464,0.483]	5284	0.000259215	0.058827	0.4	0.47
ukb_neale1	(0.388,0.408]	(0.483,0.5]	5142	-0.000170888	-0.0320519	0.4	0.49
ukb_neale1	(0.408,0.427]	(0.112,0.129]	3	-0.00515487	-1.08514	0.42	0.12
ukb_neale1	(0.408,0.427]	(0.129,0.143]	2	0.00183508	0.391801	0.42	0.14
ukb_neale1	(0.408,0.427]	(0.157,0.169]	1	0.00083714	0.18094	0.42	0.16
ukb_neale1	(0.408,0.427]	(0.169,0.185]	9	-0.00189162	-0.395634	0.42	0.18
ukb_neale1	(0.408,0.427]	(0.185,0.202]	10	0.00209906	0.447577	0.42	0.19
ukb_neale1	(0.408,0.427]	(0.202,0.219]	19	-0.00150525	-0.313996	0.42	0.21
ukb_neale1	(0.408,0.427]	(0.219,0.23]	109	0.00067395	0.146458	0.42	0.22
ukb_neale1	(0.408,0.427]	(0.23,0.25]	303	0.000788124	0.170583	0.42	0.24
ukb_neale1	(0.408,0.427]	(0.25,0.265]	462	0.000108401	0.0269606	0.42	0.26
ukb_neale1	(0.408,0.427]	(0.265,0.281]	813	-0.000826235	-0.170523	0.42	0.27
ukb_neale1	(0.408,0.427]	(0.281,0.298]	1239	-0.000204123	-0.0390741	0.42	0.29
ukb_neale1	(0.408,0.427]	(0.298,0.316]	2939	-2.02286e-05	-0.000218218	0.42	0.31
ukb_neale1	(0.408,0.427]	(0.316,0.337]	4102	-0.000328741	-0.0654054	0.42	0.33
ukb_neale1	(0.408,0.427]	(0.337,0.352]	4446	-0.000368105	-0.0737228	0.42	0.34
ukb_neale1	(0.408,0.427]	(0.352,0.371]	5254	-0.000136354	-0.0247549	0.42	0.36
ukb_neale1	(0.408,0.427]	(0.371,0.388]	7120	-0.000168117	-0.0314664	0.42	0.38
ukb_neale1	(0.408,0.427]	(0.388,0.408]	11298	0.000106406	0.0265391	0.42	0.4
ukb_neale1	(0.408,0.427]	(0.408,0.427]	7778	3.28299e-05	0.0109928	0.42	0.42
ukb_neale1	(0.408,0.427]	(0.427,0.444]	8595	-9.09543e-05	-0.0151622	0.42	0.44
ukb_neale1	(0.408,0.427]	(0.444,0.464]	10358	0.000244237	0.0556621	0.42	0.45
ukb_neale1	(0.408,0.427]	(0.464,0.483]	8995	5.02387e-05	0.0146712	0.42	0.47
ukb_neale1	(0.408,0.427]	(0.483,0.5]	8750	-0.000123576	-0.0220551	0.42	0.49
ukb_neale1	(0.427,0.444]	(0.101,0.112]	1	-0.00171762	-0.358869	0.44	0.11
ukb_neale1	(0.427,0.444]	(0.157,0.169]	10	-0.000246069	-0.0479371	0.44	0.16
ukb_neale1	(0.427,0.444]	(0.169,0.185]	26	-0.00156339	-0.32628	0.44	0.18
ukb_neale1	(0.427,0.444]	(0.185,0.202]	20	0.000339476	0.0757857	0.44	0.19
ukb_neale1	(0.427,0.444]	(0.202,0.219]	15	0.000854065	0.184516	0.44	0.21
ukb_neale1	(0.427,0.444]	(0.219,0.23]	56	0.000723692	0.156969	0.44	0.22
ukb_neale1	(0.427,0.444]	(0.23,0.25]	76	0.000997478	0.214818	0.44	0.24
ukb_neale1	(0.427,0.444]	(0.25,0.265]	174	0.000345397	0.0770368	0.44	0.26
ukb_neale1	(0.427,0.444]	(0.265,0.281]	327	0.000127489	0.0309937	0.44	0.27
ukb_neale1	(0.427,0.444]	(0.281,0.298]	619	7.84099e-06	0.00571275	0.44	0.29
ukb_neale1	(0.427,0.444]	(0.298,0.316]	1554	-9.55149e-05	-0.0161259	0.44	0.31
ukb_neale1	(0.427,0.444]	(0.316,0.337]	2660	-0.000350381	-0.0699778	0.44	0.33
ukb_neale1	(0.427,0.444]	(0.337,0.352]	2785	-0.000342051	-0.0682178	0.44	0.34
ukb_neale1	(0.427,0.444]	(0.352,0.371]	4020	-0.000148462	-0.0273134	0.44	0.36
ukb_neale1	(0.427,0.444]	(0.371,0.388]	5943	-0.000120388	-0.0213813	0.44	0.38
ukb_neale1	(0.427,0.444]	(0.388,0.408]	9639	-9.09248e-05	-0.015156	0.44	0.4
ukb_neale1	(0.427,0.444]	(0.408,0.427]	7477	-6.43056e-05	-0.00953147	0.44	0.42
ukb_neale1	(0.427,0.444]	(0.427,0.444]	9849	0.000136371	0.0328706	0.44	0.44
ukb_neale1	(0.427,0.444]	(0.444,0.464]	11710	-6.27088e-05	-0.00919409	0.44	0.45
ukb_neale1	(0.427,0.444]	(0.464,0.483]	11144	0.00018964	0.0441261	0.44	0.47
ukb_neale1	(0.427,0.444]	(0.483,0.5]	10541	1.38692e-05	0.00698649	0.44	0.49
ukb_neale1	(0.444,0.464]	(0.129,0.143]	1	0.00146248	0.313071	0.45	0.14
ukb_neale1	(0.444,0.464]	(0.143,0.157]	1	-0.00884982	-1.86587	0.45	0.15
ukb_neale1	(0.444,0.464]	(0.185,0.202]	2	-0.00143836	-0.299863	0.45	0.19
ukb_neale1	(0.444,0.464]	(0.202,0.219]	3	-0.00295159	-0.619602	0.45	0.21
ukb_neale1	(0.444,0.464]	(0.219,0.23]	31	0.000151749	0.0361198	0.45	0.22
ukb_neale1	(0.444,0.464]	(0.23,0.25]	41	-0.000434644	-0.0877822	0.45	0.24
ukb_neale1	(0.444,0.464]	(0.25,0.265]	75	-0.000240894	-0.0468437	0.45	0.26
[truncated: 225 more rows]

## Sheet: name map
Name in Supplementary File 1	Name in source data
GIANT	giant
UKB Neale (UKB)	ukb_neale1
UKB Neale new	ukb_neale2
UKB Loh	ukb_loh
UKB all no PCs	ukbsparse_all_nopcs
UKB all 10 PCs	ukbsparse_all_10pcs
UKB WB no PCs	ukbsparse_wb_nopcs
UKB WB 10 PCs	ukbsparse_wb_10pcs
NG2015 sibs	famest
UKB sibs all	ukbfam_all
UKB sibs WB	ukbfam_wb
