# Supplementary material for: Polygenic adaptation on height is overestimated due to uncorrected stratification in genome-wide association studies
Source: eLife. 2019 Mar 21;8:e39702. doi: 10.7554/eLife.39702 (PMC6428571; doi:10.7554/eLife.39702)
Supplement: Figure 3—source data 1. [file elife-39702-fig3-data1.xlsx]

## Sheet: Figures 3a and 3c
name	pvaluebin	meantSDS	meanGBRTSIdiff
famest	1	0.561139	0.0159391
famest	2	0.477128	0.0229973
famest	3	0.530113	0.0288503
famest	4	0.472321	0.0270203
famest	5	0.414748	0.0246151
famest	6	0.425567	0.0258105
famest	7	0.381989	0.02329
famest	8	0.396818	0.0239452
famest	9	0.402275	0.0239919
famest	10	0.463263	0.0216608
famest	11	0.458576	0.0241724
famest	12	0.457872	0.0230614
famest	13	0.425613	0.022264
famest	14	0.391304	0.0232216
famest	15	0.489018	0.0231117
famest	16	0.434338	0.0222846
famest	17	0.401918	0.0227235
famest	18	0.404745	0.0238718
famest	19	0.418687	0.0220191
famest	20	0.438844	0.0185426
famest	21	0.353629	0.0234095
famest	22	0.442598	0.0264119
famest	23	0.393114	0.0242472
famest	24	0.39129	0.0247995
famest	25	0.36406	0.0219254
famest	26	0.386377	0.0196423
famest	27	0.395345	0.0189888
famest	28	0.336698	0.0182937
famest	29	0.354269	0.0185359
famest	30	0.332843	0.0172925
famest	31	0.325384	0.0186278
famest	32	0.342887	0.0187058
famest	33	0.319122	0.0160687
famest	34	0.338621	0.0186166
famest	35	0.321217	0.0198257
famest	36	0.28134	0.0131619
famest	37	0.359727	0.0248977
famest	38	0.31917	0.0177973
famest	39	0.377933	0.0212936
famest	40	0.329709	0.0194083
famest	41	0.344158	0.0158853
famest	42	0.305526	0.014919
famest	43	0.388289	0.0210748
famest	44	0.356654	0.0154248
famest	45	0.325656	0.0180621
famest	46	0.3431	0.0139274
famest	47	0.355881	0.0155615
famest	48	0.352027	0.0221535
famest	49	0.265833	0.0159606
famest	50	0.306673	0.0186215
famest	51	0.331341	0.0159559
famest	52	0.297185	0.0152113
famest	53	0.310081	0.0185242
famest	54	0.275194	0.0153736
famest	55	0.279683	0.0171474
famest	56	0.271098	0.016823
famest	57	0.298362	0.0167788
famest	58	0.259596	0.0148345
famest	59	0.284487	0.0188358
famest	60	0.316237	0.0146476
famest	61	0.316776	0.0148143
famest	62	0.306158	0.0154499
famest	63	0.3502	0.0182916
famest	64	0.302893	0.0135707
famest	65	0.274693	0.0162277
famest	66	0.275649	0.0148124
famest	67	0.278623	0.0179035
famest	68	0.271218	0.014745
famest	69	0.300125	0.0150444
famest	70	0.3004	0.0171261
famest	71	0.284145	0.0163939
famest	72	0.258138	0.0161895
famest	73	0.209621	0.0132542
famest	74	0.260717	0.0175629
famest	75	0.269258	0.0155618
famest	76	0.303036	0.0174706
famest	77	0.279586	0.0169341
famest	78	0.288829	0.0152633
famest	79	0.339204	0.017069
famest	80	0.256984	0.0146108
famest	81	0.283751	0.0162366
famest	82	0.246152	0.0139495
famest	83	0.267774	0.0154598
famest	84	0.298123	0.0147879
famest	85	0.321085	0.0164682
famest	86	0.271753	0.0180601
famest	87	0.195149	0.0162212
famest	88	0.234473	0.0122231
famest	89	0.283206	0.0179344
famest	90	0.220817	0.0108255
famest	91	0.276529	0.0131217
famest	92	0.240126	0.0134357
famest	93	0.27077	0.0146667
famest	94	0.265885	0.0136234
famest	95	0.269056	0.0149022
famest	96	0.263225	0.0175677
famest	97	0.254776	0.0167421
famest	98	0.214571	0.0121894
famest	99	0.256287	0.0156566
famest	100	0.238131	0.0166207
famest	101	0.232568	0.0145482
famest	102	0.25381	0.0154229
famest	103	0.235859	0.01319
famest	104	0.238547	0.0123325
famest	105	0.275837	0.0123044
famest	106	0.202844	0.0133991
famest	107	0.282572	0.014049
famest	108	0.21315	0.0147737
famest	109	0.183156	0.014671
famest	110	0.225878	0.0148307
famest	111	0.217626	0.0139668
famest	112	0.266019	0.0101163
famest	113	0.243752	0.0132116
famest	114	0.204516	0.0110576
famest	115	0.264794	0.012434
famest	116	0.20872	0.0104052
famest	117	0.243215	0.0136911
famest	118	0.21055	0.0110031
famest	119	0.209956	0.0127868
famest	120	0.278232	0.0113339
famest	121	0.248983	0.0144433
famest	122	0.274314	0.0153117
famest	123	0.195211	0.0084052
famest	124	0.19382	0.0128914
famest	125	0.226448	0.0128631
famest	126	0.278323	0.011986
famest	127	0.287342	0.0121757
famest	128	0.276508	0.0129011
famest	129	0.207576	0.013637
famest	130	0.204076	0.010565
famest	131	0.239932	0.0139748
famest	132	0.16802	0.0149657
famest	133	0.205585	0.0135558
famest	134	0.287781	0.0103815
famest	135	0.214264	0.0128072
famest	136	0.237369	0.0137721
famest	137	0.203792	0.00834939
famest	138	0.248878	0.0114171
famest	139	0.219859	0.00802685
famest	140	0.248293	0.0104994
famest	141	0.240356	0.0125101
famest	142	0.221477	0.0103577
famest	143	0.259812	0.0142269
famest	144	0.211495	0.0098996
famest	145	0.180359	0.0104955
famest	146	0.243866	0.0113767
famest	147	0.226997	0.0120625
famest	148	0.16736	0.0133
famest	149	0.206493	0.0108656
famest	150	0.190695	0.0105207
famest	151	0.201144	0.0104151
famest	152	0.191484	0.0112942
famest	153	0.190649	0.0116413
famest	154	0.167572	0.0132424
famest	155	0.231286	0.00750087
famest	156	0.193066	0.0105348
famest	157	0.252089	0.0120897
famest	158	0.219438	0.00981392
famest	159	0.229601	0.0102269
famest	160	0.203563	0.00814675
famest	161	0.158652	0.00936444
famest	162	0.192663	0.0132994
famest	163	0.229697	0.0116762
famest	164	0.200508	0.00920113
famest	165	0.14337	0.00930058
famest	166	0.275178	0.009968
famest	167	0.179233	0.0100912
famest	168	0.239124	0.0129262
famest	169	0.162368	0.0105733
famest	170	0.199303	0.0149364
famest	171	0.127994	0.0112308
famest	172	0.198541	0.0104526
famest	173	0.194643	0.00970789
famest	174	0.16277	0.00998906
famest	175	0.190886	0.00965892
famest	176	0.148414	0.00878388
famest	177	0.242277	0.0109244
famest	178	0.214802	0.00725753
famest	179	0.189056	0.009686
famest	180	0.196226	0.00567596
famest	181	0.21543	0.0123421
famest	182	0.141097	0.00984675
famest	183	0.211948	0.0106158
famest	184	0.208267	0.00770481
famest	185	0.153625	0.00965662
famest	186	0.183098	0.00725773
famest	187	0.195479	0.013101
famest	188	0.201935	0.00613947
famest	189	0.175846	0.0115351
famest	190	0.170101	0.0113965
famest	191	0.217681	0.00965973
famest	192	0.146283	0.0109389
famest	193	0.220128	0.0122221
famest	194	0.228781	0.0100683
famest	195	0.19488	0.00860694
famest	196	0.14396	0.00890205
famest	197	0.154249	0.0104552
famest	198	0.192529	0.00844961
famest	199	0.171911	0.0131086
famest	200	0.212036	0.0125466
famest	201	0.208368	0.00958943
famest	202	0.140203	0.00961526
famest	203	0.227375	0.00827276
famest	204	0.166793	0.0112071
famest	205	0.144282	0.0100324
famest	206	0.0996547	0.0115048
famest	207	0.206381	0.0105783
famest	208	0.189368	0.0109169
famest	209	0.187374	0.0111483
famest	210	0.164991	0.00983526
famest	211	0.182669	0.00856132
famest	212	0.108413	0.00896322
famest	213	0.187916	0.00751522
famest	214	0.195149	0.00754929
famest	215	0.200776	0.0118575
famest	216	0.221896	0.00899873
famest	217	0.170566	0.00835394
famest	218	0.135655	0.00985011
famest	219	0.148792	0.00786006
famest	220	0.191358	0.0112447
famest	221	0.190071	0.0109932
famest	222	0.167256	0.0112257
famest	223	0.224539	0.0143109
famest	224	0.176049	0.00909488
famest	225	0.155693	0.00716746
famest	226	0.204034	0.00863544
famest	227	0.159022	0.00931096
famest	228	0.121672	0.00953023
famest	229	0.174863	0.00706805
famest	230	0.157253	0.00895949
famest	231	0.17786	0.0112011
famest	232	0.147837	0.0098835
famest	233	0.18345	0.00818245
famest	234	0.15449	0.0102083
famest	235	0.195454	0.0113336
famest	236	0.177094	0.0101841
famest	237	0.176516	0.00789146
famest	238	0.17922	0.0104593
famest	239	0.172191	0.0102386
famest	240	0.144053	0.00760725
famest	241	0.190912	0.0108439
famest	242	0.186325	0.0113394
famest	243	0.132917	0.00928357
famest	244	0.143894	0.0102993
famest	245	0.149293	0.0119477
famest	246	0.212531	0.00878461
famest	247	0.198528	0.0107699
famest	248	0.214515	0.00911228
famest	249	0.168319	0.00876051
famest	250	0.152963	0.0124534
famest	251	0.100667	0.00639389
famest	252	0.209506	0.0104815
famest	253	0.159927	0.0102379
famest	254	0.179645	0.00940038
famest	255	0.132975	0.00957707
famest	256	0.215307	0.0107096
famest	257	0.230396	0.00853727
famest	258	0.1114	0.00744587
famest	259	0.150771	0.011153
famest	260	0.0657075	0.00843873
famest	261	0.20531	0.00772887
famest	262	0.144332	0.00650517
famest	263	0.157748	0.00496713
famest	264	0.114707	0.0109393
famest	265	0.134741	0.0101481
famest	266	0.209357	0.0092193
famest	267	0.136638	0.00729216
famest	268	0.231939	0.0126343
famest	269	0.175461	0.00795345
famest	270	0.164854	0.0115942
famest	271	0.16315	0.00698289
famest	272	0.155509	0.00980232
famest	273	0.135011	0.0101273
famest	274	0.126856	0.00654388
famest	275	0.15327	0.0088884
famest	276	0.112028	0.0045316
famest	277	0.200155	0.00744603
famest	278	0.109962	0.00487538
famest	279	0.206096	0.00959806
famest	280	0.0810971	0.0056918
famest	281	0.192003	0.0094993
famest	282	0.177543	0.00989538
famest	283	0.140464	0.00898797
famest	284	0.171564	0.00906979
famest	285	0.172319	0.00900698
famest	286	0.213125	0.00786968
famest	287	0.15666	0.00706201
famest	288	0.126436	0.0105453
famest	289	0.112883	0.00971867
famest	290	0.157017	0.00901963
famest	291	0.140092	0.00934662
famest	292	0.146983	0.0124123
famest	293	0.160126	0.0069259
famest	294	0.133492	0.0067905
famest	295	0.169829	0.00922384
famest	296	0.191914	0.00818968
famest	297	0.10931	0.00784269
famest	298	0.181055	0.00633497
famest	299	0.129336	0.00765566
famest	300	0.146004	0.00689043
famest	301	0.133273	0.00750483
famest	302	0.134599	0.0091663
famest	303	0.131795	0.00535266
famest	304	0.168748	0.00470002
famest	305	0.117298	0.00611977
famest	306	0.168071	0.00806511
famest	307	0.136025	0.00716489
famest	308	0.0344483	0.00818692
famest	309	0.131558	0.00756253
famest	310	0.192211	0.00889879
famest	311	0.141705	0.0076722
famest	312	0.17408	0.0083257
famest	313	0.14905	0.00651697
famest	314	0.189311	0.00446591
famest	315	0.151149	0.00386737
famest	316	0.125875	0.00942079
famest	317	0.160731	0.00928147
famest	318	0.115339	0.00831855
famest	319	0.131503	0.00455996
famest	320	0.143197	0.00482144
famest	321	0.191145	0.00863747
famest	322	0.162249	0.00844404
famest	323	0.19403	0.00907823
famest	324	0.133562	0.0104543
famest	325	0.121578	0.00778597
famest	326	0.0853787	0.00226752
famest	327	0.133985	0.00606745
famest	328	0.184723	0.00525431
famest	329	0.162033	0.00652024
famest	330	0.189849	0.0100031
famest	331	0.155374	0.0076002
famest	332	0.151785	0.00507084
famest	333	0.138183	0.00759591
famest	334	0.190703	0.0108413
famest	335	0.188018	0.00912927
famest	336	0.181826	0.00750077
famest	337	0.151429	0.00992548
famest	338	0.140335	0.00894616
famest	339	0.118121	0.00588962
famest	340	0.127716	0.00654255
famest	341	0.165504	0.00264817
famest	342	0.11752	0.005025
famest	343	0.100411	0.0106346
famest	344	0.116747	0.00611162
famest	345	0.216698	0.00668245
famest	346	0.113221	0.0045222
famest	347	0.175293	0.00756417
famest	348	0.109408	0.00867623
famest	349	0.203756	0.00748415
famest	350	0.0830553	0.00436285
famest	351	0.114102	0.0061943
famest	352	0.103945	0.00799898
famest	353	0.140735	0.0083416
famest	354	0.184465	0.00619151
famest	355	0.158026	0.0074029
famest	356	0.145223	0.00941019
famest	357	0.147782	0.00813621
famest	358	0.0881626	0.00627659
famest	359	0.164569	0.00570077
famest	360	0.164555	0.00410742
famest	361	0.120988	0.00549059
famest	362	0.165564	0.00926577
famest	363	0.107858	0.00447081
famest	364	0.114862	0.0066597
famest	365	0.180056	0.00797464
famest	366	0.115608	0.00728078
famest	367	0.104953	0.00286545
famest	368	0.148471	0.00776469
famest	369	0.136764	0.00968992
famest	370	0.121512	0.00737276
famest	371	0.101884	0.00604635
famest	372	0.136108	0.00819401
famest	373	0.173398	0.00749749
famest	374	0.134062	0.00830246
famest	375	0.0890055	0.00522427
famest	376	0.131312	0.00796149
famest	377	0.108796	0.00604021
famest	378	0.0826778	0.00449113
famest	379	0.13621	0.0071718
famest	380	0.13667	0.00354825
famest	381	0.132475	0.0055564
famest	382	0.102045	0.00474036
famest	383	0.151995	0.00513983
famest	384	0.11878	0.00264444
famest	385	0.106314	0.00604771
famest	386	0.112696	0.00260534
famest	387	0.108198	0.00499785
famest	388	0.0799554	0.0035775
famest	389	0.143232	0.0074899
famest	390	0.0915376	0.0062117
famest	391	0.120387	0.00404266
famest	392	0.136293	0.00867435
famest	393	0.130117	0.00513918
famest	394	0.0812049	0.00718114
famest	395	0.0891594	0.00569525
famest	396	0.158279	0.00544291
famest	397	0.0684078	0.00453468
famest	398	0.190314	0.00529442
famest	399	0.095539	0.00691949
famest	400	0.0880002	0.00681403
famest	401	0.127036	0.00622294
famest	402	0.132536	0.00372445
famest	403	0.130482	0.00517127
famest	404	0.109733	0.00281
famest	405	0.0762745	0.00670935
famest	406	0.0687684	0.00588293
famest	407	0.105943	0.00406063
famest	408	0.12816	0.00547618
famest	409	0.190218	0.00701114
famest	410	0.0421231	0.00157662
famest	411	0.144475	0.00219603
famest	412	0.124605	0.00637668
famest	413	0.0941954	0.00186466
famest	414	0.148252	0.00650219
famest	415	0.122502	0.00657562
famest	416	0.0795255	0.00698208
famest	417	0.0785111	0.00616836
famest	418	0.0999078	0.00462623
famest	419	0.118523	0.00912419
famest	420	0.115279	0.00778132
famest	421	0.146036	0.00619647
famest	422	0.11809	0.00678689
famest	423	0.133823	0.00396103
famest	424	0.134352	0.00529455
famest	425	0.0907382	0.00615132
famest	426	0.0639239	0.00509339
famest	427	0.119134	0.00455881
famest	428	0.0862481	0.00364072
famest	429	0.123665	0.0070397
famest	430	0.147967	0.00351184
famest	431	0.130409	0.00156902
famest	432	0.0803756	0.00547551
famest	433	0.110225	0.00689883
famest	434	0.025134	0.00572816
famest	435	0.14382	0.00623027
famest	436	0.11447	0.00534119
famest	437	0.106273	0.00566373
famest	438	0.105548	0.00508893
famest	439	0.0826596	0.0077757
famest	440	0.0980002	0.00298568
famest	441	0.0904771	0.00599061
famest	442	0.0629162	-0.000666626
famest	443	0.114395	0.00431588
famest	444	0.134276	0.00455987
famest	445	0.146395	0.0050271
famest	446	0.11019	0.00483235
famest	447	0.12688	0.00497355
famest	448	0.126689	0.00641351
famest	449	0.112887	0.00386783
famest	450	0.0403414	0.00317817
famest	451	0.0955305	0.00528632
famest	452	0.115925	0.00572134
famest	453	0.059202	0.00713215
famest	454	0.134391	0.00664084
famest	455	0.172617	0.010168
famest	456	0.106791	0.00412696
famest	457	0.102463	0.00366562
famest	458	0.0716414	0.00681921
famest	459	0.104936	0.00380071
famest	460	0.0518823	0.00333447
famest	461	0.106694	0.00608923
famest	462	0.141871	0.00555932
famest	463	0.0864757	0.00296048
famest	464	0.128231	0.0041966
famest	465	0.0561954	0.00267805
famest	466	0.0907826	0.00680379
famest	467	0.0950221	0.00545714
famest	468	0.0628713	0.00629063
famest	469	0.0674386	0.00473549
famest	470	0.104414	0.00729721
famest	471	0.13502	0.00722179
famest	472	0.10098	0.00405231
famest	473	0.0972324	0.00746776
famest	474	0.113944	0.00542899
famest	475	0.0527618	0.00681911
famest	476	0.108364	0.00353898
famest	477	0.024559	0.0050578
famest	478	0.0719383	0.00751878
famest	479	0.129054	0.00651112
famest	480	0.0528182	0.0035432
famest	481	0.063812	0.00494692
famest	482	0.0646717	0.0082246
famest	483	0.0660185	0.00547825
famest	484	0.0607919	0.00287762
famest	485	0.115908	0.00729253
famest	486	0.0872366	0.00563108
famest	487	0.051104	0.00369983
famest	488	0.0818945	0.00220049
famest	489	0.0963617	0.00575118
famest	490	0.121347	0.00655147
famest	491	0.0523092	0.00159904
famest	492	0.125608	0.00799852
famest	493	0.107028	0.00530398
famest	494	0.0864144	0.00719032
famest	495	0.125149	0.00236679
famest	496	0.0548232	0.00329324
famest	497	0.120692	0.00602046
famest	498	0.0442184	0.00633658
famest	499	0.082212	0.0049756
famest	500	0.0740155	0.00539415
famest	501	0.0565268	0.00670511
famest	502	0.123653	0.00632127
famest	503	0.12147	0.00466388
famest	504	0.0482192	0.00177202
famest	505	0.105827	0.00419555
famest	506	0.0724547	0.0027281
famest	507	0.0248408	0.00384636
famest	508	0.128527	0.00708193
famest	509	0.0726065	0.00574325
famest	510	0.0427943	0.00397545
famest	511	0.0799355	0.00448178
famest	512	0.0875624	0.00174339
famest	513	0.175664	0.00594728
famest	514	0.100533	0.0023089
famest	515	0.0708387	0.00379028
famest	516	0.0544957	0.0048308
famest	517	0.103437	0.00261676
famest	518	0.128718	0.00547525
famest	519	0.0709536	0.00450241
famest	520	0.113632	0.00335033
famest	521	0.0168056	0.0034068
famest	522	0.104811	0.00358403
famest	523	0.0662462	0.00618784
famest	524	0.104515	0.00540532
famest	525	-0.00319279	0.00286545
famest	526	0.0856206	0.00571971
famest	527	0.0976481	0.00189572
famest	528	0.0933644	0.00492143
famest	529	0.0937063	0.00564451
famest	530	0.0587454	0.00300422
famest	531	0.0950938	0.00292345
famest	532	0.0801245	0.000780357
famest	533	0.128477	0.0056363
famest	534	0.0750555	0.00565819
famest	535	0.0773331	0.00368403
famest	536	0.0623886	0.00366576
famest	537	0.0988592	0.00554162
famest	538	0.120121	0.00717392
famest	539	0.0281178	0.000737707
famest	540	0.162415	0.00641487
famest	541	0.126345	0.00431617
famest	542	0.043212	0.00436756
famest	543	0.0861804	0.00322901
famest	544	0.0346343	0.00587581
famest	545	0.0379761	-0.000411898
famest	546	0.0541102	0.00389276
famest	547	0.0283013	0.00218936
famest	548	0.107851	0.00240325
famest	549	0.0172593	0.000603394
famest	550	0.0640773	0.00538129
famest	551	0.0441274	-0.000529773
famest	552	0.0621675	0.00214807
famest	553	0.105752	0.00423438
famest	554	0.0697986	0.00520062
famest	555	0.0751782	0.00407646
famest	556	0.0642338	0.00365514
famest	557	0.094908	-0.000374521
famest	558	0.0384884	0.000799044
famest	559	0.074613	0.00344165
famest	560	0.0543369	0.00175981
famest	561	0.104662	0.00604112
famest	562	0.0702555	0.0050281
famest	563	0.119508	0.00735749
famest	564	0.00640302	0.000782298
famest	565	0.0229302	0.0045673
famest	566	0.10995	0.00288122
famest	567	0.0743949	0.00391737
famest	568	0.0792033	0.00393195
famest	569	0.0622847	0.00376626
famest	570	0.00537538	0.00457729
famest	571	0.0813961	0.0029544
famest	572	0.0633826	0.00429185
famest	573	0.097588	0.00508038
famest	574	0.0236841	0.00411715
famest	575	0.0551978	0.00352523
famest	576	0.0435727	0.00387547
famest	577	0.0690191	0.00494363
famest	578	0.0639648	0.00327165
famest	579	0.0770971	0.00211031
famest	580	0.0699188	0.0037461
famest	581	0.0288253	0.0045427
famest	582	-0.00857448	0.000246397
famest	583	0.0501909	0.00184196
famest	584	0.105594	0.00413569
famest	585	0.0388978	0.00420331
famest	586	0.0786801	0.00311461
famest	587	0.0648106	0.00325983
famest	588	0.0193021	0.00274423
famest	589	0.0880105	0.00710437
famest	590	0.0799071	0.00229013
famest	591	0.00998501	0.00282454
famest	592	0.0382487	0.00508624
famest	593	0.0593017	0.00424192
famest	594	0.0787207	0.0046275
famest	595	0.0973853	0.00189475
famest	596	0.0652217	0.00661528
famest	597	0.0106175	0.00261589
famest	598	0.0746078	0.00352935
famest	599	0.133573	0.00507757
famest	600	0.0380183	0.00530821
famest	601	0.0432793	0.00130617
famest	602	0.0774034	0.00143404
famest	603	0.074851	-0.000931541
famest	604	0.019783	0.00173154
famest	605	0.0181749	0.00335998
famest	606	0.0358664	0.000835175
famest	607	0.0670587	0.00172053
famest	608	0.0697019	0.004202
famest	609	0.00392366	0.00258879
famest	610	0.0927594	0.00419953
famest	611	0.0699122	0.0028075
famest	612	0.078459	0.00012351
famest	613	0.0315849	0.000849968
famest	614	0.062748	0.00225217
famest	615	-0.00100766	0.000324341
famest	616	0.0283403	0.00174442
famest	617	0.0659696	0.00119117
famest	618	-0.0117003	-0.00367628
famest	619	0.0404488	0.00213022
famest	620	0.0748909	0.00240931
famest	621	0.0604571	-0.000104902
famest	622	0.0761431	0.00155146
famest	623	0.0438878	0.00412798
famest	624	0.00973951	-0.00102121
famest	625	0.0792556	0.00231414
famest	626	0.0958498	0.00322283
famest	627	0.0963272	0.00100756
famest	628	0.110312	0.00199221
famest	629	0.030316	0.00176998
famest	630	-0.0172502	0.000853843
famest	631	0.0933713	0.00535296
famest	632	0.0397161	0.00173397
famest	633	0.0574323	0.00223753
famest	634	0.0247312	-3.57e-05
famest	635	0.0337891	0.00223646
famest	636	0.0296863	-0.00114061
famest	637	0.0554748	0.00139568
famest	638	0.0222513	0.00297879
famest	639	0.0833263	0.00247038
famest	640	0.0310709	0.00651565
famest	641	0.0252949	0.00217105
famest	642	0.0430307	0.00145224
famest	643	0.0521475	0.00454101
famest	644	0.062432	0.00409986
famest	645	0.0280432	0.00207043
famest	646	0.0282495	0.000718953
famest	647	0.0433553	0.00234752
famest	648	0.0281945	0.000893909
famest	649	0.0588987	0.000247169
famest	650	0.0395517	0.00579288
famest	651	0.0138147	0.000626706
famest	652	-0.00912951	0.000632824
famest	653	0.00534211	0.00119388
famest	654	0.00912711	0.000424482
famest	655	0.0679761	0.000564237
famest	656	0.0296761	0.000971738
famest	657	0.0771346	0.00217999
famest	658	0.0583833	0.00342397
famest	659	-0.0260441	0.00318434
famest	660	0.0424739	0.00265105
famest	661	0.0716782	0.00415411
famest	662	0.0617833	0.00236744
famest	663	0.099023	0.00250146
famest	664	0.0679774	0.00411122
famest	665	-0.018137	0.00150539
famest	666	0.0889067	0.00328061
famest	667	0.0100077	0.000231302
famest	668	-0.0252511	0.000842315
famest	669	0.0250959	-0.00134081
famest	670	0.0556075	0.000826588
famest	671	0.0552106	0.00263569
famest	672	0.017782	0.00130848
famest	673	0.0527957	0.00344288
famest	674	0.0697926	0.00164548
famest	675	0.0254949	0.00174772
famest	676	0.0261448	-0.000734054
famest	677	-0.00551541	0.000401315
famest	678	0.0147016	9.25e-05
famest	679	-0.018131	5e-05
famest	680	0.0142181	0.0018749
famest	681	0.0432131	0.00336142
famest	682	-0.0391145	0.000807158
famest	683	0.0631398	-0.000121054
famest	684	0.0825339	0.00240718
famest	685	0.0780253	0.00408564
famest	686	0.0264189	-0.00150628
famest	687	0.0201868	0.00321364
famest	688	-0.0129941	-0.000422963
famest	689	-0.0343272	0.00220298
famest	690	0.0239751	0.00470623
famest	691	0.0416419	0.000271857
famest	692	0.0177745	0.00125971
famest	693	-0.0304528	0.000971297
famest	694	0.0548992	0.00133675
famest	695	0.0853824	0.00319492
famest	696	0.0143027	0.000806677
famest	697	0.0386614	0.00286922
famest	698	0.0234145	0.000580392
famest	699	0.0475572	-0.00131457
famest	700	0.0599583	-0.000337662
famest	701	0.0758351	0.00118191
famest	702	0.0658148	-2.92e-05
famest	703	-0.0065499	-0.000647617
famest	704	0.0190602	0.0017406
famest	705	0.0531692	0.00541194
famest	706	0.00223132	-0.00210843
famest	707	-0.00495349	0.000691302
famest	708	0.0359743	0.00149301
famest	709	0.00706542	0.00259677
famest	710	0.0411847	-0.00151286
famest	711	-0.0209397	0.00092695
famest	712	0.0667345	0.0028801
famest	713	0.0170167	-0.000524441
famest	714	0.0229682	0.00042372
famest	715	0.0312037	0.00201057
famest	716	0.0335206	0.00261166
famest	717	0.0491228	0.00321634
famest	718	0.0278837	0.00277896
famest	719	0.0221529	0.0022325
famest	720	0.0262333	-0.000931419
famest	721	-0.00105025	-0.0018255
famest	722	0.0551335	0.00336017
famest	723	-0.0131843	0.00127455
famest	724	0.0561151	7.32e-05
famest	725	-0.0189523	0.000791307
famest	726	-0.0107324	0.000850684
famest	727	-0.0626193	0.00280554
famest	728	0.00197796	-0.00207838
famest	729	-0.000632791	0.000623647
famest	730	0.0196179	0.0023487
famest	731	0.0225814	-0.000220107
famest	732	-0.0442706	0.00258391
famest	733	0.0483067	-0.00064869
famest	734	0.053721	0.00515702
famest	735	0.0144847	0.00229352
famest	736	0.0272849	-0.00186207
famest	737	0.0465657	0.00261086
famest	738	-0.0253621	0.0027624
famest	739	-0.0069607	0.000171203
famest	740	0.0459888	0.00287959
famest	741	0.0239038	0.00211816
famest	742	0.0459991	0.00134145
famest	743	0.0284015	0.00314199
famest	744	0.0124225	-0.00106952
famest	745	0.0594148	-0.000536434
famest	746	0.0390483	-0.0021299
famest	747	0.0577646	0.00121079
famest	748	0.0395843	0.00310247
famest	749	0.0709082	0.00387107
famest	750	0.00552221	0.00123471
famest	751	0.0176365	0.00208457
famest	752	-0.000897088	0.00313467
famest	753	-0.0116645	-0.00179873
famest	754	0.0539845	-0.000437749
famest	755	-0.00885415	-0.000629442
famest	756	0.0134885	-0.00126311
famest	757	-0.0677839	-0.00038986
famest	758	0.0419476	-0.00146915
famest	759	-0.00711799	0.00172061
famest	760	0.0389729	0.000769374
famest	761	0.0433848	-0.00151254
famest	762	0.0394683	0.00168973
famest	763	0.0329479	0.000895804
famest	764	0.0275649	0.0011737
famest	765	0.101708	0.000515941
famest	766	0.042222	0.00222921
famest	767	-0.0295907	-0.00210058
famest	768	-0.0111493	-0.000428254
famest	769	0.0533752	0.00408796
famest	770	0.0591822	0.00193242
famest	771	-0.00246556	-0.000497594
famest	772	0.0147602	0.000839678
famest	773	0.0277969	0.00167444
famest	774	0.0102818	-0.00116558
famest	775	0.00763531	0.00264032
famest	776	0.0140116	-0.00267708
famest	777	0.0155016	3.64e-05
famest	778	0.0178684	-0.000695654
famest	779	0.0195452	-0.000805355
famest	780	0.0259339	-0.00102633
famest	781	-0.0275897	-0.00271574
famest	782	-0.0141809	-0.00269726
famest	783	0.0112034	0.00316716
famest	784	-0.00305117	-0.00479692
famest	785	0.0121773	-0.00151065
famest	786	-0.00578709	0.00053307
famest	787	-0.0606408	-0.00302922
famest	788	0.0485121	-0.00218674
famest	789	0.0760342	-0.000222983
famest	790	0.0556743	-0.00306169
famest	791	-0.0190986	-0.000789054
famest	792	0.0202087	-0.00229087
famest	793	-0.0295032	-0.000743799
famest	794	-0.0297789	-0.000284757
famest	795	0.0131866	0.0015399
famest	796	0.0567033	-0.000780152
famest	797	-0.0151542	0.000469493
famest	798	-0.00260276	0.000435957
famest	799	-0.0282361	-0.00143379
famest	800	-0.0171158	-0.00161334
famest	801	0.00624604	0.000985627
famest	802	-0.0195142	0.0028081
famest	803	0.0142496	-0.00278078
famest	804	-0.046833	0.00329853
famest	805	-0.0120565	-0.0002176
famest	806	-0.0452322	-0.0010193
famest	807	0.00128082	0.000256522
famest	808	-0.00222715	-0.00083926
famest	809	-4.37e-05	0.000727806
famest	810	-0.018147	0.000586756
famest	811	-0.0419621	0.00069237
giant	1	0.455016	-0.00831708
giant	2	0.556937	0.00319085
giant	3	0.305309	-0.00208601
giant	4	0.380256	0.0127213
giant	5	0.267995	0.00764404
giant	6	0.259753	0.00656094
giant	7	0.150049	-0.00236847
giant	8	0.259505	0.001115
giant	9	0.395373	-0.00129819
giant	10	0.316414	0.00204923
giant	11	0.425242	0.00850857
giant	12	0.450128	0.0073127
giant	13	0.402861	0.00410353
giant	14	0.445754	0.00909831
giant	15	0.234444	0.00317088
giant	16	0.192328	0.00298312
giant	17	0.223288	0.00027107
giant	18	0.344519	0.00791338
giant	19	0.243658	0.00719282
giant	20	0.324215	0.00819937
giant	21	0.261322	0.00694885
giant	22	0.286082	-0.00178916
giant	23	0.323965	0.00573477
giant	24	0.286374	0.00600043
giant	25	0.319506	0.00680292
giant	26	0.31492	0.00124308
giant	27	0.217985	0.00131992
giant	28	0.285025	0.00297965
giant	29	0.300761	0.011058
giant	30	0.229917	0.00518408
giant	31	0.259177	0.00750298
giant	32	0.214147	0.00406863
giant	33	0.259861	0.00853346
giant	34	0.265732	0.00889716
giant	35	0.218316	0.00506259
giant	36	0.370859	0.0176946
giant	37	0.337571	0.0115309
giant	38	0.286462	0.0108621
giant	39	0.275643	0.00636064
giant	40	0.279083	0.00914539
giant	41	0.289235	0.00339167
giant	42	0.253487	0.00489972
giant	43	0.273064	0.00737383
giant	44	0.28141	0.00676346
giant	45	0.216572	0.00420338
giant	46	0.315007	0.00799552
giant	47	0.259559	0.00985774
giant	48	0.236468	0.00897265
giant	49	0.31911	0.00932898
giant	50	0.30578	0.0120035
giant	51	0.283157	0.00886947
giant	52	0.309062	0.00862567
giant	53	0.25897	0.0110944
giant	54	0.242303	0.00576806
giant	55	0.253905	0.00806355
giant	56	0.259522	0.00881783
giant	57	0.251664	0.0114715
giant	58	0.248331	0.00953039
giant	59	0.301516	0.0128012
giant	60	0.23043	0.00796236
giant	61	0.275491	0.00896766
giant	62	0.271315	0.00784859
giant	63	0.233736	0.00762292
giant	64	0.265334	0.0105878
giant	65	0.256191	0.00605411
giant	66	0.216271	0.00729773
giant	67	0.230561	0.00930526
giant	68	0.188297	0.00462932
giant	69	0.287598	0.0113431
giant	70	0.277317	0.0123435
giant	71	0.319629	0.0114268
giant	72	0.248265	0.00717363
giant	73	0.232313	0.01125
giant	74	0.28464	0.0117187
giant	75	0.327215	0.0082265
giant	76	0.257101	0.00550715
giant	77	0.22375	0.00828685
giant	78	0.281959	0.0108921
giant	79	0.248195	0.0137391
giant	80	0.241089	0.00865293
giant	81	0.27172	0.0132176
giant	82	0.236658	0.0127279
giant	83	0.297134	0.0108398
giant	84	0.291259	0.0113209
giant	85	0.327993	0.0125147
giant	86	0.307317	0.0129929
giant	87	0.278521	0.0136144
giant	88	0.319236	0.0121491
giant	89	0.239977	0.012051
giant	90	0.255648	0.0089065
giant	91	0.228837	0.0110578
giant	92	0.260337	0.0133332
giant	93	0.209218	0.0121368
giant	94	0.299691	0.0144936
giant	95	0.264238	0.01237
giant	96	0.252958	0.0143614
giant	97	0.300314	0.0116676
giant	98	0.337937	0.0112402
giant	99	0.287727	0.0134064
giant	100	0.310122	0.00911737
giant	101	0.297666	0.0122286
giant	102	0.222551	0.0105708
giant	103	0.29728	0.0130019
giant	104	0.340741	0.0141533
giant	105	0.329481	0.0175421
giant	106	0.292471	0.0115596
giant	107	0.240125	0.00931403
giant	108	0.246607	0.00875783
giant	109	0.255547	0.0138615
giant	110	0.224317	0.00990022
giant	111	0.238286	0.00910891
giant	112	0.243116	0.0112821
giant	113	0.232978	0.010126
giant	114	0.264293	0.00710636
giant	115	0.302692	0.011257
giant	116	0.327972	0.0131057
giant	117	0.268849	0.0103451
giant	118	0.320607	0.0133329
giant	119	0.333412	0.0141451
giant	120	0.308499	0.0107521
giant	121	0.319676	0.00963839
giant	122	0.332279	0.0130404
giant	123	0.265107	0.00955481
giant	124	0.332186	0.00946535
giant	125	0.329248	0.0140696
giant	126	0.233495	0.00895185
giant	127	0.287039	0.0130533
giant	128	0.245112	0.0111807
giant	129	0.255697	0.0135389
giant	130	0.221419	0.0103998
giant	131	0.227393	0.00872508
giant	132	0.257775	0.0119884
giant	133	0.257349	0.00959954
giant	134	0.279488	0.0117955
giant	135	0.369261	0.0132385
giant	136	0.24511	0.0102812
giant	137	0.286414	0.00904871
giant	138	0.243835	0.0078584
giant	139	0.322074	0.0129941
giant	140	0.245546	0.0106252
giant	141	0.271003	0.00800391
giant	142	0.308704	0.0150677
giant	143	0.296584	0.0104504
giant	144	0.219104	0.0109824
giant	145	0.207319	0.0108869
giant	146	0.295225	0.0129343
giant	147	0.252821	0.00651541
giant	148	0.26284	0.00924786
giant	149	0.246661	0.0107896
giant	150	0.234896	0.00867535
giant	151	0.237055	0.01004
giant	152	0.259016	0.0129734
giant	153	0.24329	0.0125535
giant	154	0.231507	0.00966858
giant	155	0.232948	0.00968429
giant	156	0.284283	0.0132411
giant	157	0.246781	0.0132257
giant	158	0.2695	0.0140378
giant	159	0.226014	0.0112625
giant	160	0.300398	0.015765
giant	161	0.218425	0.00858068
giant	162	0.227482	0.0136841
giant	163	0.19158	0.0103998
giant	164	0.236022	0.010537
giant	165	0.290895	0.00962302
giant	166	0.242846	0.0136266
giant	167	0.267499	0.00757764
giant	168	0.258169	0.0113067
giant	169	0.281488	0.0115135
giant	170	0.294823	0.0115124
giant	171	0.267375	0.00901434
giant	172	0.244398	0.00895335
giant	173	0.261184	0.0106706
giant	174	0.301491	0.00921264
giant	175	0.296331	0.00696847
giant	176	0.201682	0.00843286
giant	177	0.254095	0.0142538
giant	178	0.221793	0.00749109
giant	179	0.339654	0.0125812
giant	180	0.202421	0.00910402
giant	181	0.259947	0.00797371
giant	182	0.266649	0.00896374
giant	183	0.236454	0.0086197
giant	184	0.24766	0.0131853
giant	185	0.241037	0.0109808
giant	186	0.241447	0.0063503
giant	187	0.275179	0.00826129
giant	188	0.27941	0.00892098
giant	189	0.275591	0.00772046
giant	190	0.246022	0.00835656
giant	191	0.289096	0.00720216
giant	192	0.241444	0.00998768
giant	193	0.318124	0.0104675
giant	194	0.271485	0.00567306
giant	195	0.264746	0.00969962
giant	196	0.328389	0.0126549
giant	197	0.275888	0.0106189
giant	198	0.283434	0.00971117
giant	199	0.290671	0.00994473
giant	200	0.268813	0.00940483
giant	201	0.264184	0.00613581
giant	202	0.302622	0.00898538
giant	203	0.282437	0.0119137
giant	204	0.237345	0.0134072
giant	205	0.292355	0.0117004
giant	206	0.225253	0.00721263
giant	207	0.318942	0.00644293
giant	208	0.276136	0.00868448
giant	209	0.258007	0.00967953
giant	210	0.306732	0.0127236
giant	211	0.28052	0.00892619
giant	212	0.269248	0.00888348
giant	213	0.255555	0.00921436
giant	214	0.272918	0.0126857
giant	215	0.212285	0.00825204
giant	216	0.249757	0.0091853
giant	217	0.215241	0.00998557
giant	218	0.234643	0.00948638
giant	219	0.283718	0.0106193
giant	220	0.247798	0.00966678
giant	221	0.243379	0.00880418
giant	222	0.279716	0.00786042
giant	223	0.277776	0.0108839
giant	224	0.224967	0.0103827
giant	225	0.291415	0.00862846
giant	226	0.220116	0.00762811
giant	227	0.204777	0.00969074
giant	228	0.231413	0.00865765
giant	229	0.258121	0.0109284
giant	230	0.30859	0.013162
giant	231	0.258942	0.0116662
giant	232	0.272207	0.00910729
giant	233	0.243959	0.0087027
giant	234	0.213699	0.00991109
giant	235	0.225969	0.0122567
giant	236	0.189286	0.0074551
giant	237	0.237853	0.0113468
giant	238	0.25893	0.00948104
giant	239	0.283609	0.00922121
giant	240	0.262145	0.00990622
giant	241	0.267343	0.0086296
giant	242	0.300134	0.00861578
giant	243	0.209467	0.0083261
giant	244	0.203535	0.00942285
giant	245	0.265194	0.0100254
giant	246	0.262892	0.0098768
giant	247	0.24051	0.00951111
giant	248	0.236329	0.00742566
giant	249	0.220605	0.00890467
giant	250	0.248617	0.00903886
giant	251	0.2722	0.0114941
giant	252	0.217229	0.00861939
giant	253	0.234457	0.00835801
giant	254	0.241456	0.00938186
giant	255	0.215534	0.00736835
giant	256	0.207745	0.00809613
giant	257	0.205798	0.00777825
giant	258	0.218873	0.00778478
giant	259	0.226831	0.00915192
giant	260	0.222768	0.00938188
giant	261	0.218566	0.00869044
giant	262	0.226662	0.0101904
giant	263	0.247501	0.00766663
giant	264	0.254658	0.00893978
giant	265	0.227135	0.00409052
giant	266	0.256696	0.0116936
giant	267	0.206861	0.00836836
giant	268	0.181618	0.00673597
giant	269	0.322427	0.0136375
giant	270	0.245441	0.0075534
giant	271	0.258416	0.0123018
giant	272	0.230149	0.0117686
giant	273	0.302789	0.0124098
giant	274	0.239918	0.0103782
giant	275	0.255641	0.00847305
giant	276	0.311486	0.0130602
giant	277	0.252918	0.0109139
giant	278	0.235324	0.0132223
giant	279	0.180535	0.0108609
giant	280	0.18074	0.00778356
giant	281	0.196328	0.00918484
giant	282	0.269738	0.00993426
giant	283	0.241067	0.00873754
giant	284	0.155334	0.00803692
giant	285	0.254103	0.0114429
giant	286	0.245959	0.00708463
giant	287	0.245631	0.00999387
giant	288	0.222375	0.0131984
giant	289	0.226066	0.0118134
giant	290	0.206541	0.0112286
giant	291	0.233956	0.00837172
giant	292	0.151672	0.00664461
giant	293	0.253224	0.00913885
giant	294	0.146038	0.00898128
giant	295	0.201354	0.00811111
giant	296	0.163831	0.00752107
giant	297	0.232621	0.0108527
giant	298	0.238606	0.00991925
giant	299	0.255437	0.0125385
giant	300	0.190643	0.0112532
giant	301	0.246019	0.0130471
giant	302	0.245281	0.0120122
giant	303	0.207306	0.012812
giant	304	0.263678	0.00933477
giant	305	0.186698	0.010171
giant	306	0.191278	0.0117052
giant	307	0.184404	0.0109331
giant	308	0.215221	0.009567
giant	309	0.261204	0.0126691
giant	310	0.144239	0.0104903
giant	311	0.17127	0.00712349
giant	312	0.232538	0.0113392
giant	313	0.197757	0.00991348
giant	314	0.217572	0.00980334
giant	315	0.228606	0.00935256
giant	316	0.211383	0.0104199
giant	317	0.210301	0.009763
giant	318	0.205528	0.01065
giant	319	0.211516	0.0129052
giant	320	0.256239	0.0121813
giant	321	0.177997	0.00834357
giant	322	0.221031	0.0110463
giant	323	0.187775	0.00905003
giant	324	0.216603	0.00884316
giant	325	0.225925	0.00551906
giant	326	0.228837	0.00867999
giant	327	0.197842	0.00568415
giant	328	0.204721	0.0116455
giant	329	0.256022	0.00950978
giant	330	0.218209	0.00759625
giant	331	0.19809	0.0102463
giant	332	0.178993	0.0116167
giant	333	0.205934	0.0108896
giant	334	0.195403	0.00838629
giant	335	0.172338	0.00985911
giant	336	0.147337	0.00956529
giant	337	0.220517	0.00877005
giant	338	0.244076	0.00996656
giant	339	0.253875	0.0130306
giant	340	0.229747	0.00965492
giant	341	0.237029	0.00795661
giant	342	0.235598	0.00969075
giant	343	0.278381	0.0115609
giant	344	0.253293	0.0107596
giant	345	0.220863	0.0100592
giant	346	0.180788	0.0106072
giant	347	0.199841	0.00881872
giant	348	0.196008	0.00907467
giant	349	0.238235	0.0116168
giant	350	0.185951	0.00573318
giant	351	0.245958	0.00986958
giant	352	0.242053	0.0112048
giant	353	0.187409	0.00678944
giant	354	0.251366	0.00809191
giant	355	0.163786	0.00723029
giant	356	0.213031	0.00526054
giant	357	0.199476	0.00889497
giant	358	0.21742	0.00875219
giant	359	0.193696	0.00872801
giant	360	0.218115	0.00778481
giant	361	0.230486	0.00961373
giant	362	0.186909	0.00902576
giant	363	0.166183	0.00839974
giant	364	0.247742	0.00864972
giant	365	0.240066	0.00978099
giant	366	0.197017	0.00980133
giant	367	0.222501	0.0117506
giant	368	0.197313	0.00866675
giant	369	0.189922	0.0129026
giant	370	0.194562	0.00863033
giant	371	0.150538	0.00819973
giant	372	0.209319	0.00866323
giant	373	0.172547	0.00813866
giant	374	0.212974	0.00830533
giant	375	0.179797	0.00698155
giant	376	0.209179	0.00696193
giant	377	0.229944	0.0114735
giant	378	0.226228	0.0103953
giant	379	0.223023	0.0114742
giant	380	0.283524	0.00990082
giant	381	0.212581	0.00753213
giant	382	0.19941	0.0131789
giant	383	0.203854	0.0105844
giant	384	0.1906	0.00943965
giant	385	0.160055	0.00800022
giant	386	0.191208	0.0101853
giant	387	0.250203	0.0122551
giant	388	0.191461	0.00816811
giant	389	0.207689	0.00782224
giant	390	0.219277	0.00719011
giant	391	0.218772	0.00996567
giant	392	0.216645	0.0109166
giant	393	0.21202	0.00706176
giant	394	0.22061	0.00900055
giant	395	0.221312	0.0118089
giant	396	0.174465	0.00743798
giant	397	0.183347	0.0086231
giant	398	0.232078	0.00627614
giant	399	0.228868	0.0104751
giant	400	0.248156	0.00750652
giant	401	0.202346	0.010364
giant	402	0.20219	0.00756329
giant	403	0.196429	0.0116341
giant	404	0.175553	0.00841409
giant	405	0.179986	0.00745629
giant	406	0.266682	0.0127816
giant	407	0.22896	0.00988535
giant	408	0.187192	0.00823862
giant	409	0.251752	0.0099672
giant	410	0.209327	0.0106168
giant	411	0.237152	0.0109566
giant	412	0.195343	0.0100373
giant	413	0.25362	0.00948118
giant	414	0.279944	0.0121176
giant	415	0.19987	0.0123411
giant	416	0.171836	0.00700882
giant	417	0.152548	0.00946172
giant	418	0.160114	0.00882121
giant	419	0.192344	0.00950082
giant	420	0.160089	0.00875805
giant	421	0.164191	0.00902991
giant	422	0.221384	0.00889694
giant	423	0.238088	0.00741291
giant	424	0.169342	0.00779821
giant	425	0.126393	0.00909134
giant	426	0.196497	0.0099844
giant	427	0.217294	0.0101086
giant	428	0.227841	0.0129052
giant	429	0.170459	0.00891733
giant	430	0.155082	0.0098873
giant	431	0.186223	0.00516234
giant	432	0.166556	0.0105099
giant	433	0.133695	0.00874386
giant	434	0.116749	0.00881815
giant	435	0.204753	0.0128615
giant	436	0.209442	0.0109823
giant	437	0.133059	0.00920302
giant	438	0.189876	0.00884106
giant	439	0.183424	0.00736738
giant	440	0.194737	0.010457
giant	441	0.237227	0.0114633
giant	442	0.205406	0.00637152
giant	443	0.163747	0.00459601
giant	444	0.216674	0.00983503
giant	445	0.230533	0.00977781
giant	446	0.235564	0.00800888
giant	447	0.185779	0.0124027
giant	448	0.237848	0.00761754
giant	449	0.198832	0.0108159
giant	450	0.201359	0.0101513
giant	451	0.163174	0.0124946
giant	452	0.192221	0.0108989
giant	453	0.178866	0.0077632
giant	454	0.167884	0.011144
giant	455	0.186579	0.0122887
giant	456	0.145012	0.0100397
giant	457	0.163104	0.00788331
giant	458	0.208482	0.00877427
giant	459	0.203316	0.00713445
giant	460	0.162088	0.00955441
giant	461	0.191727	0.00829467
giant	462	0.15595	0.00886452
giant	463	0.216332	0.00775833
giant	464	0.17515	0.00765679
giant	465	0.163624	0.00296399
giant	466	0.155194	0.0057501
giant	467	0.166739	0.0106249
giant	468	0.133826	0.00837769
giant	469	0.222229	0.0054074
giant	470	0.179303	0.00537617
giant	471	0.130829	0.00651852
giant	472	0.215926	0.00730768
giant	473	0.184526	0.00876954
giant	474	0.201807	0.00746468
giant	475	0.184979	0.00869125
giant	476	0.207657	0.00628846
giant	477	0.128399	0.0043692
giant	478	0.125976	0.0077478
giant	479	0.103032	0.00428316
giant	480	0.198835	0.00833435
giant	481	0.153162	0.00963519
giant	482	0.15896	0.00810688
giant	483	0.215578	0.00714613
giant	484	0.14716	0.00846759
giant	485	0.196055	0.00727034
giant	486	0.143475	0.00672249
giant	487	0.23456	0.0108325
giant	488	0.184323	0.0080579
giant	489	0.205382	0.00855335
giant	490	0.176158	0.00836526
giant	491	0.192861	0.00680265
giant	492	0.227431	0.00915457
giant	493	0.179121	0.0101222
giant	494	0.178973	0.0083319
giant	495	0.182008	0.00899186
giant	496	0.135099	0.00777066
giant	497	0.19312	0.00804078
giant	498	0.214724	0.00684294
giant	499	0.145376	0.00639807
giant	500	0.209355	0.00812645
giant	501	0.157177	0.00725804
giant	502	0.165559	0.00720715
giant	503	0.129148	0.00859646
giant	504	0.161705	0.0071059
giant	505	0.138981	0.00633793
giant	506	0.11567	0.00379959
giant	507	0.190802	0.00544329
giant	508	0.174893	0.00765626
giant	509	0.149318	0.00684203
giant	510	0.215941	0.00856419
giant	511	0.122129	0.00913166
giant	512	0.226344	0.0109806
giant	513	0.153027	0.00496876
giant	514	0.202138	0.0117081
giant	515	0.159859	0.00608792
giant	516	0.174731	0.0102038
giant	517	0.164379	0.00777558
giant	518	0.213552	0.00589666
giant	519	0.121599	0.00661649
giant	520	0.0781417	0.00562275
giant	521	0.168682	0.00969087
giant	522	0.161722	0.010159
giant	523	0.138203	0.00387208
giant	524	0.204313	0.00673817
giant	525	0.137537	0.0100533
giant	526	0.140163	0.00595458
giant	527	0.177682	0.00662911
giant	528	0.183812	0.0066795
giant	529	0.178257	0.00870201
giant	530	0.144867	0.00779036
giant	531	0.150667	0.00815788
giant	532	0.176451	0.00804428
giant	533	0.179189	0.00609529
giant	534	0.20541	0.010419
giant	535	0.156345	0.0068031
giant	536	0.201952	0.00566884
giant	537	0.127296	0.00627989
giant	538	0.116534	0.00802574
giant	539	0.130294	0.00744349
giant	540	0.126812	0.00420524
giant	541	0.103143	0.00892085
giant	542	0.161627	0.00641661
giant	543	0.168617	0.00482351
giant	544	0.168088	0.00500014
giant	545	0.219279	0.00821628
giant	546	0.211957	0.00983633
giant	547	0.146791	0.00871694
giant	548	0.175177	0.00726223
giant	549	0.207625	0.0060538
giant	550	0.132697	0.00706433
giant	551	0.186572	0.00669574
giant	552	0.150878	0.00561369
giant	553	0.175492	0.00842704
giant	554	0.196957	0.0061118
giant	555	0.139577	0.00430288
giant	556	0.134403	0.00987667
giant	557	0.205216	0.00852287
giant	558	0.140188	0.00776972
giant	559	0.221709	0.00956758
giant	560	0.22215	0.00632312
giant	561	0.172623	0.00590691
giant	562	0.165563	0.00477359
giant	563	0.183727	0.0064265
giant	564	0.159059	0.00802427
giant	565	0.160686	0.00735117
giant	566	0.137778	0.00652858
giant	567	0.168131	0.00536878
giant	568	0.166706	0.00731733
giant	569	0.192859	0.00958215
giant	570	0.187583	0.00799574
giant	571	0.15116	0.00575392
giant	572	0.165982	0.00563472
giant	573	0.183602	0.00834456
giant	574	0.163789	0.00833164
giant	575	0.141801	0.00668201
giant	576	0.102575	0.00637405
giant	577	0.145873	0.00657018
giant	578	0.142078	0.00746212
giant	579	0.158774	0.0054823
giant	580	0.165288	0.00474629
giant	581	0.11916	0.00615631
giant	582	0.184247	0.00562387
giant	583	0.186525	0.00760994
giant	584	0.164082	0.00448641
giant	585	0.0963893	0.00632034
giant	586	0.176351	0.0064746
giant	587	0.142922	0.00757958
giant	588	0.160767	0.00721058
giant	589	0.169734	0.0071618
giant	590	0.173823	0.00587904
giant	591	0.153825	0.00917336
giant	592	0.165519	0.0105342
giant	593	0.157845	0.00914868
giant	594	0.169765	0.00629684
giant	595	0.13152	0.00884287
giant	596	0.0873579	0.00545314
giant	597	0.148699	0.00609721
giant	598	0.111637	0.00755618
giant	599	0.150341	0.00631463
giant	600	0.173058	0.00649826
giant	601	0.161923	0.00718935
giant	602	0.171343	0.00812109
giant	603	0.122706	0.00397775
giant	604	0.172498	0.00690126
giant	605	0.0471493	0.00608598
giant	606	0.151604	0.00566687
giant	607	0.172088	0.00708259
giant	608	0.157336	0.00779975
giant	609	0.124039	0.00743014
giant	610	0.146904	0.00656297
giant	611	0.104447	0.00831427
giant	612	0.120227	0.00715223
giant	613	0.123844	0.00612989
giant	614	0.147587	0.0100514
giant	615	0.125857	0.00791779
giant	616	0.132627	0.00506511
giant	617	0.197042	0.00814956
giant	618	0.167721	0.00949446
giant	619	0.141248	0.00443627
giant	620	0.173035	0.00862754
giant	621	0.12518	0.00575896
giant	622	0.143633	0.00743345
giant	623	0.185114	0.0102521
giant	624	0.156738	0.00558448
giant	625	0.104597	0.0053369
giant	626	0.145551	0.00837555
giant	627	0.175282	0.00615042
giant	628	0.125203	0.0034657
giant	629	0.159683	0.00809826
giant	630	0.173759	0.00261647
giant	631	0.147227	0.00976143
giant	632	0.159148	0.00581011
giant	633	0.110995	0.00724775
giant	634	0.0955065	0.0102916
giant	635	0.174385	0.00327734
giant	636	0.152219	0.00799249
giant	637	0.122656	0.00551416
giant	638	0.0682327	0.00659057
giant	639	0.187846	0.00847713
giant	640	0.19074	0.0102753
giant	641	0.169432	0.00970841
giant	642	0.163485	0.0075204
giant	643	0.193936	0.00974615
giant	644	0.163256	0.00594369
giant	645	0.155974	0.00669886
giant	646	0.113683	0.00751349
giant	647	0.0932806	0.00878503
giant	648	0.150404	0.0076571
giant	649	0.105928	0.00337724
giant	650	0.143324	0.00463699
giant	651	0.144999	0.00786621
giant	652	0.151631	0.00530859
giant	653	0.131634	0.00990868
giant	654	0.123654	0.00921832
giant	655	0.149831	0.00735133
giant	656	0.0938532	0.00783432
giant	657	0.135829	0.00766283
giant	658	0.164679	0.00562788
giant	659	0.140774	0.00425823
giant	660	0.0852886	0.00538653
giant	661	0.102394	0.00362859
giant	662	0.191966	0.0090648
giant	663	0.148309	0.00871262
giant	664	0.145099	0.00664888
giant	665	0.109424	0.00746491
giant	666	0.107631	0.00848823
giant	667	0.0930923	0.0115153
giant	668	0.176452	0.00915967
giant	669	0.123099	0.00703088
giant	670	0.124461	0.0075027
giant	671	0.146178	0.00768299
giant	672	0.099306	0.00679683
giant	673	0.135462	0.00925414
giant	674	0.13626	0.00857201
giant	675	0.089045	0.00798316
giant	676	0.13944	0.00603976
giant	677	0.115026	0.00551798
giant	678	0.192731	0.00817799
giant	679	0.0682578	0.00638982
giant	680	0.088856	0.00394105
giant	681	0.0981221	0.00633739
giant	682	0.168775	0.00428982
giant	683	0.117758	0.00767721
giant	684	0.151807	0.00937002
giant	685	0.103799	0.00546677
giant	686	0.11535	0.00901579
giant	687	0.167364	0.00682108
giant	688	0.112275	0.00278016
giant	689	0.0929525	0.00345782
giant	690	0.154003	0.00743036
giant	691	0.11304	0.00708993
giant	692	0.0947181	0.00644867
giant	693	0.200287	0.0068623
giant	694	0.108559	0.00654775
giant	695	0.114779	0.00348511
giant	696	0.115643	0.00527198
giant	697	0.165319	0.0095929
giant	698	0.108476	0.00402091
giant	699	0.108951	0.00580747
giant	700	0.111688	0.00645126
giant	701	0.151153	0.00590511
giant	702	0.157505	0.00648899
giant	703	0.204231	0.00848
giant	704	0.156065	0.00623598
giant	705	0.0963283	0.00608453
giant	706	0.057701	0.00358037
giant	707	0.114904	0.00713467
giant	708	0.0990174	0.00496705
giant	709	0.146827	0.00731992
giant	710	0.168541	0.00718904
giant	711	0.109691	0.00725388
giant	712	0.0796032	0.00727658
giant	713	0.11203	0.00974541
giant	714	0.14838	0.00908435
giant	715	0.160898	0.0054462
giant	716	0.133637	0.00567539
giant	717	0.103598	0.00813935
giant	718	0.0394639	0.00558512
giant	719	0.0886965	0.00693338
giant	720	0.132828	0.0035119
giant	721	0.100963	0.00478378
giant	722	0.108174	0.00602772
giant	723	0.164795	0.00796664
giant	724	0.105808	0.00479008
giant	725	0.264451	0.00850624
giant	726	0.139321	0.00692981
giant	727	0.140477	0.00973877
giant	728	0.150987	0.00610013
giant	729	0.0885422	0.00746732
giant	730	0.15799	0.0066003
giant	731	0.0821198	0.00609435
giant	732	0.129898	0.00382684
giant	733	0.166615	0.0102531
giant	734	0.140885	0.00530644
giant	735	0.119259	0.00727095
giant	736	0.16236	0.00956678
giant	737	0.128952	0.00957973
giant	738	0.222407	0.0116359
giant	739	0.0969809	0.00583763
giant	740	0.1055	0.00615498
giant	741	0.151021	0.00554405
giant	742	0.109066	0.00565904
giant	743	0.115218	0.00542248
giant	744	0.135334	0.0071189
giant	745	0.132573	0.00656433
giant	746	0.0906391	0.00799481
giant	747	0.0903654	0.00558192
giant	748	0.106079	0.0021702
giant	749	0.0705255	0.00404364
giant	750	0.138463	0.00828046
giant	751	0.104009	0.00493979
giant	752	0.130412	0.0070689
giant	753	0.197689	0.00958286
giant	754	0.156535	0.00848867
giant	755	0.126653	0.0104631
giant	756	0.100113	0.00630451
giant	757	0.148429	0.00499518
giant	758	0.0884874	0.00442096
giant	759	0.108729	0.00636305
giant	760	0.120967	0.00485564
giant	761	0.160523	0.00451458
giant	762	0.0504988	0.00604729
giant	763	0.189017	0.00794935
giant	764	0.13375	0.00509122
giant	765	0.119777	0.00723821
giant	766	0.123438	0.00401228
giant	767	0.124629	0.00922666
giant	768	0.168092	0.00986469
giant	769	0.0831183	0.00492094
giant	770	0.164958	0.00350207
giant	771	0.130926	0.00666314
giant	772	0.179613	0.0107513
giant	773	0.177479	0.00694369
giant	774	0.148088	0.00844093
giant	775	0.132215	0.00598006
giant	776	0.166547	0.00690643
giant	777	0.0763114	0.00489355
giant	778	0.0892615	0.00514617
giant	779	0.200244	0.0098701
giant	780	0.141774	0.00868392
giant	781	0.197949	0.00738436
giant	782	0.149597	0.00860077
giant	783	0.0676785	0.00648817
giant	784	0.117149	0.00768331
giant	785	0.133666	0.00605025
giant	786	0.192059	0.00621732
giant	787	0.105993	0.00097648
giant	788	0.133644	0.00853846
giant	789	0.129178	0.00796042
giant	790	0.157278	0.00856325
giant	791	0.112621	0.0108621
giant	792	0.160648	0.00448866
giant	793	0.167115	0.00886603
giant	794	0.109202	0.00600418
giant	795	0.117672	0.00676564
giant	796	0.141321	0.00478313
giant	797	0.116984	0.00732072
giant	798	0.142255	0.006544
giant	799	0.126192	0.00356895
giant	800	0.181751	0.00709193
giant	801	0.11696	0.00577596
giant	802	0.132644	0.00376692
giant	803	0.164137	0.00779365
giant	804	0.133638	0.00719983
giant	805	0.075351	0.00484221
giant	806	0.129468	0.00619347
giant	807	0.158433	0.00600378
giant	808	0.121802	0.005112
giant	809	0.142638	0.00648643
giant	810	0.165717	0.00412307
giant	811	0.157458	0.00518508
giant	812	0.148643	0.00773562
giant	813	0.164061	0.00707578
giant	814	0.139177	0.00751865
giant	815	0.132789	0.00381721
giant	816	0.115662	0.00544222
giant	817	0.132317	0.0058516
giant	818	0.124826	0.00557266
giant	819	0.170425	0.00718938
giant	820	0.0838457	0.00658169
giant	821	0.119844	0.00623216
giant	822	0.222244	0.0120911
giant	823	0.12385	0.00775291
giant	824	0.133519	0.00369482
giant	825	0.157597	0.00701995
giant	826	0.116018	0.00639877
giant	827	0.130412	0.00835564
giant	828	0.119933	0.00689271
giant	829	0.158862	0.00619754
giant	830	0.125384	0.00703704
giant	831	0.155511	0.00821114
giant	832	0.132442	0.00467173
giant	833	0.11823	0.00319241
giant	834	0.170695	0.00817694
giant	835	0.086958	0.00639613
giant	836	0.105448	0.00796725
giant	837	0.18217	0.00613602
giant	838	0.101668	0.00868444
giant	839	0.12314	0.00651056
giant	840	0.218805	0.00839866
giant	841	0.151095	0.0106178
giant	842	0.091829	0.00509296
giant	843	0.196469	0.00895499
giant	844	0.132188	0.00664672
giant	845	0.099757	0.00316312
giant	846	0.135175	0.00759678
giant	847	0.138078	0.00460789
giant	848	0.133539	0.00514004
giant	849	0.183402	0.006848
giant	850	0.106868	0.00543037
giant	851	0.107295	0.00519748
giant	852	0.191163	0.00591168
giant	853	0.0764403	0.00446372
giant	854	0.0872141	0.00434901
giant	855	0.107756	0.00815589
giant	856	0.185126	0.00822711
giant	857	0.125081	0.00598064
giant	858	0.135832	0.00401264
giant	859	0.187079	0.00895189
giant	860	0.128374	0.00568101
giant	861	0.152618	0.00611366
giant	862	0.17185	0.00670521
giant	863	0.0910766	0.00820293
giant	864	0.151421	0.0024121
giant	865	0.0816429	0.00267503
giant	866	0.10604	0.00651737
giant	867	0.125742	0.00652717
giant	868	0.0886653	0.00409746
giant	869	0.127272	0.00599733
giant	870	0.161157	0.00781891
giant	871	0.170737	0.00534121
giant	872	0.130864	0.00325096
giant	873	0.174758	0.00519531
giant	874	0.133499	0.00654482
giant	875	0.0856077	0.00594809
giant	876	0.120808	0.00473703
giant	877	0.157738	0.00551452
giant	878	0.11693	0.00546723
giant	879	0.109951	0.00155252
giant	880	0.130746	0.00373488
giant	881	0.138619	0.00741812
giant	882	0.123673	0.00723503
giant	883	0.0970314	0.00332852
giant	884	0.162213	0.00563869
giant	885	0.114303	0.00788989
giant	886	0.1596	0.00476161
giant	887	0.0705861	0.00511536
giant	888	0.115117	0.00799942
giant	889	0.187615	0.00601224
giant	890	0.13868	0.00581801
giant	891	0.101342	0.00931692
giant	892	0.151438	0.00885024
giant	893	0.123164	0.00685392
giant	894	0.14153	0.00521299
giant	895	0.0418495	0.00484924
giant	896	0.070304	0.00115698
giant	897	0.082542	0.00528571
giant	898	0.106034	0.00526913
giant	899	0.165068	0.00880317
giant	900	0.105198	0.00479932
giant	901	0.0675464	0.00132415
giant	902	0.0591308	0.00691995
giant	903	0.137251	0.00719205
giant	904	0.0830463	0.00840796
giant	905	0.140505	0.00476702
giant	906	0.0310385	0.00549507
giant	907	0.114719	0.00295932
giant	908	0.110223	0.0041908
giant	909	0.132012	0.00252405
giant	910	0.0738428	0.0040889
giant	911	0.0868375	0.00576517
giant	912	0.0788909	0.00341233
giant	913	0.140608	0.00630345
giant	914	0.138737	0.00302577
giant	915	0.0593099	0.00265448
giant	916	0.113916	0.00617026
giant	917	0.163254	0.00636079
giant	918	0.0883398	0.00388117
giant	919	0.160042	0.0051509
giant	920	0.119051	0.00475449
giant	921	0.13917	0.00784577
giant	922	0.115514	0.00764994
giant	923	0.114744	0.00502805
giant	924	0.131959	0.00767599
giant	925	0.119009	0.00602989
giant	926	0.101738	0.00644972
giant	927	0.0521134	0.00535424
giant	928	0.123205	0.00662198
giant	929	0.158547	0.0037077
giant	930	0.0897676	0.00503022
giant	931	0.100843	0.00625415
giant	932	0.168101	0.00628243
giant	933	0.139512	0.00736485
giant	934	0.151611	0.00581918
giant	935	0.149887	0.00475027
giant	936	0.14129	0.0071447
giant	937	0.13446	0.00216296
giant	938	0.13498	0.00360417
giant	939	0.137669	0.00696662
giant	940	0.0988703	0.00943082
giant	941	0.116858	0.00598178
giant	942	0.129676	0.00175626
giant	943	0.132269	0.00457748
giant	944	0.0753095	0.00602028
giant	945	0.158993	0.00520784
giant	946	0.0767493	0.00564032
giant	947	0.188571	0.00771476
giant	948	0.0819212	0.00401094
giant	949	0.131864	0.00220943
giant	950	0.168451	0.00446526
giant	951	0.123202	0.00653123
giant	952	0.0916685	0.00488423
giant	953	0.0634867	0.0034378
giant	954	0.12313	0.00358016
giant	955	0.0790432	0.00484355
giant	956	0.0748113	0.00481565
giant	957	0.0964278	0.00456255
giant	958	0.086534	0.00748542
giant	959	0.105783	0.00701605
giant	960	0.158389	0.00710538
giant	961	0.132142	0.00590636
giant	962	0.100611	0.00881005
giant	963	0.149506	0.00582145
giant	964	0.177525	0.008099
giant	965	0.120956	0.00418753
giant	966	0.0459098	0.00350294
giant	967	0.123066	0.00370817
giant	968	0.108132	0.00364027
giant	969	0.138642	0.00373907
giant	970	0.137391	0.00576449
giant	971	0.130069	0.00639995
giant	972	0.162359	0.00852946
giant	973	0.10914	0.003853
giant	974	0.203283	0.0031198
giant	975	0.10868	0.00549039
giant	976	0.120871	0.00596962
giant	977	0.108071	0.00364302
giant	978	0.0719321	0.00394498
giant	979	0.111161	0.00795863
giant	980	0.126505	0.00762573
giant	981	0.113935	0.0050377
giant	982	0.1196	0.00685387
giant	983	0.0982121	0.00413427
giant	984	0.110502	0.00379992
giant	985	0.0463748	0.00260676
giant	986	0.134675	0.00479239
giant	987	0.0913263	0.00417343
giant	988	0.131814	0.00448451
giant	989	0.0955978	0.0058177
giant	990	0.117674	0.00597423
giant	991	0.15403	0.00573911
giant	992	0.13827	0.00485862
giant	993	0.0882542	0.00531069
giant	994	0.0722913	0.00544704
giant	995	0.109939	0.00282507
giant	996	0.125913	0.00747249
giant	997	0.095158	0.00493791
giant	998	0.109675	0.00486055
giant	999	0.0708739	0.00356429
giant	1000	0.079847	0.00676843
giant	1001	0.0907937	0.00771114
giant	1002	0.102741	0.00551601
giant	1003	0.135297	0.00563401
giant	1004	0.0673881	0.00371128
giant	1005	0.0896892	0.00657279
giant	1006	0.0583259	0.0050417
giant	1007	0.0674753	0.00323359
giant	1008	0.065483	0.00512355
giant	1009	0.0847426	0.00251445
giant	1010	0.117993	0.00089028
giant	1011	0.153221	0.0117579
giant	1012	0.112335	0.00620517
giant	1013	0.0949558	0.00700363
giant	1014	0.114561	0.00428676
giant	1015	0.14084	0.00348434
giant	1016	0.122872	0.00387719
giant	1017	0.0953706	0.00317465
giant	1018	0.0669959	0.00380924
giant	1019	0.136505	0.00398349
giant	1020	0.110963	0.00193468
giant	1021	0.113766	0.0110394
giant	1022	0.143255	0.00725962
giant	1023	0.117433	0.00415631
giant	1024	0.13433	0.00490216
giant	1025	0.117258	0.0078813
giant	1026	0.0897246	0.0055869
giant	1027	0.0973417	0.00202443
giant	1028	0.0900157	0.00351961
giant	1029	0.0530353	0.00124831
giant	1030	0.124672	0.00482819
giant	1031	0.0797188	0.00544544
giant	1032	0.0931294	0.00626738
giant	1033	0.106185	0.00408776
giant	1034	0.105879	0.00646825
giant	1035	0.113161	0.00139299
giant	1036	0.10236	0.00330325
giant	1037	0.0992371	0.00423059
giant	1038	0.0727037	0.00427986
giant	1039	0.115596	0.00426864
giant	1040	0.138056	0.00727134
giant	1041	0.0849158	0.00897057
giant	1042	0.143719	0.00163619
giant	1043	0.0957528	0.00368794
giant	1044	0.12922	0.00642711
giant	1045	0.0877398	0.00347934
giant	1046	0.0992106	0.00334368
giant	1047	0.112086	0.00440125
giant	1048	0.106752	0.00297443
giant	1049	0.125588	0.00669715
giant	1050	0.0999477	0.00339695
giant	1051	0.136398	0.00504431
giant	1052	0.15239	0.00632103
giant	1053	0.112185	0.00584919
giant	1054	0.083479	0.00406522
giant	1055	0.10366	0.00451641
giant	1056	0.130712	0.00731002
giant	1057	0.113829	0.00648307
giant	1058	0.0906187	0.00450377
giant	1059	0.157513	0.00603468
giant	1060	0.113526	0.00489731
giant	1061	0.105551	0.00549078
giant	1062	0.0954566	0.00283615
giant	1063	0.119588	0.00571463
giant	1064	0.0984186	0.00710889
giant	1065	0.101777	0.00123691
giant	1066	0.12335	0.00485822
giant	1067	0.0748892	0.00642469
giant	1068	0.106414	0.00209316
giant	1069	0.149087	0.00295177
giant	1070	0.0935781	0.00344382
giant	1071	0.0548895	0.00050984
giant	1072	0.0812877	0.0025664
giant	1073	0.0708796	0.00249512
giant	1074	0.103155	0.00407329
giant	1075	0.0744049	0.00308197
giant	1076	0.117467	0.000835
giant	1077	0.042899	0.00458923
giant	1078	0.14048	0.0088006
giant	1079	0.102477	0.00150809
giant	1080	0.151877	0.00286177
giant	1081	0.0987582	0.00444222
giant	1082	0.0858745	0.00328421
giant	1083	0.0575297	0.00568643
giant	1084	0.0952405	0.00504686
giant	1085	0.0666907	0.00617873
giant	1086	0.104579	0.00462046
giant	1087	0.0646298	-0.00140253
giant	1088	0.113679	0.00557912
giant	1089	0.0915057	0.00421645
giant	1090	0.0426479	0.00597094
giant	1091	0.092888	0.00716402
giant	1092	0.125749	0.00417592
giant	1093	0.0904977	0.00689377
giant	1094	0.0976761	0.00371926
giant	1095	0.144076	0.00557853
giant	1096	0.0434944	0.00633911
giant	1097	0.139533	0.00552325
giant	1098	0.0929353	0.00301476
giant	1099	0.122005	0.00276963
giant	1100	0.0329059	0.00381315
giant	1101	0.0683119	0.00459924
giant	1102	0.0782672	0.0050813
giant	1103	0.0993341	0.0027626
giant	1104	0.14828	0.00491322
giant	1105	0.0899911	0.00291724
giant	1106	0.0365913	0.00554462
giant	1107	0.0980925	0.00540007
giant	1108	0.0921341	0.00443546
giant	1109	0.092944	0.00521217
giant	1110	0.0840254	0.00367262
giant	1111	0.0790867	0.0072914
giant	1112	0.0998212	0.00650167
giant	1113	0.0546005	0.00444146
giant	1114	0.111307	0.00581843
giant	1115	0.116275	0.00763009
giant	1116	0.165464	0.00479515
giant	1117	0.118091	0.0063951
giant	1118	0.12234	0.00578355
giant	1119	0.0711642	0.00372694
giant	1120	0.100478	0.00226769
giant	1121	0.139737	0.00615313
giant	1122	0.0895545	0.00794248
giant	1123	0.0649911	0.00333547
giant	1124	0.101253	0.00443474
giant	1125	0.0816134	0.00442557
giant	1126	0.17127	0.00839906
giant	1127	0.121152	0.00369321
giant	1128	0.103991	0.00431552
giant	1129	0.0542618	0.00225864
giant	1130	0.0913794	0.00656626
giant	1131	0.130417	0.00400332
giant	1132	0.0389298	0.00600716
giant	1133	0.100869	0.0036689
giant	1134	0.117425	0.00631838
giant	1135	0.0910303	0.00347181
giant	1136	0.118908	0.00602619
giant	1137	0.106974	0.00425779
giant	1138	0.0605453	0.00284357
giant	1139	0.0912172	0.00451834
giant	1140	0.104586	0.00658012
giant	1141	0.075296	0.00529082
giant	1142	0.0646444	0.0050203
giant	1143	0.0967169	0.00192817
giant	1144	0.0884203	0.00519128
giant	1145	0.104475	0.00103488
giant	1146	0.0963399	0.00431131
giant	1147	0.0964037	0.00473187
giant	1148	0.102155	0.00640915
giant	1149	0.0583272	0.00300905
giant	1150	0.0230094	0.00466926
giant	1151	0.16813	0.00344338
giant	1152	0.100959	0.00348849
giant	1153	0.041784	0.00496681
giant	1154	0.0614336	0.00438248
giant	1155	0.114901	0.0080071
giant	1156	0.0920836	0.00618607
giant	1157	0.125927	0.00439807
giant	1158	0.0637001	0.00309417
giant	1159	0.134764	0.00408919
giant	1160	0.110371	0.00139903
giant	1161	0.0736259	0.00322085
giant	1162	0.135947	0.0055271
giant	1163	0.0836662	0.00798755
giant	1164	0.10499	0.00452493
giant	1165	0.0518748	0.00283429
giant	1166	0.130252	0.00684704
giant	1167	0.094934	0.00646292
giant	1168	0.0200403	0.00351312
giant	1169	0.111719	0.00352557
giant	1170	0.0317695	0.00231499
giant	1171	0.124822	0.00419885
giant	1172	0.110214	0.00094363
giant	1173	0.029393	0.00161105
giant	1174	0.150522	0.00490766
giant	1175	0.0881009	0.00575427
giant	1176	0.0813817	0.00566239
giant	1177	0.12935	0.00455989
giant	1178	0.0569868	0.00460734
giant	1179	0.104412	0.00707224
giant	1180	0.0859758	0.00237993
giant	1181	0.076791	0.00402469
giant	1182	0.0753206	0.00274077
giant	1183	0.119033	0.00317049
giant	1184	0.0674279	0.00395217
giant	1185	0.0452259	0.00341576
giant	1186	0.0929574	0.00457888
giant	1187	0.0947681	0.00244578
giant	1188	0.118883	0.00429144
[truncated: 5,887 more rows]

## Sheet: Figures 3b and 3d
rsid	CHR	POS	A1	A2	beta	gbrfrq	tsifrq	SDSnorm	tSDS	afdiff	tafdiff
rs10746487	1	9338689	C	T	0.005801	NA	NA	2.30863	2.30863	NA	NA
rs2982372	1	11372913	C	T	0.0283	NA	NA	1.22185	1.22185	NA	NA
rs9435731	1	17306029	A	C	0.01465	NA	NA	1.02334	1.02334	NA	NA
rs72639756	1	17383439	G	A	-0.02019	NA	NA	0.645779	-0.645779	NA	NA
rs11203297	1	17419024	A	G	0.0009361	0.1573	0.148	-0.738416	-0.738416	0.0093	0.132032
rs10799816	1	19795951	G	A	0.008614	0.5337	0.5	1.89708	1.89708	0.0337	0.505669
rs4529730	1	19871134	T	C	0.008769	NA	NA	-0.266473	-0.266473	NA	NA
rs1609558	1	21525228	C	T	0.003247	0.4382	0.4541	0.763082	0.763082	-0.0159	-0.253856
rs212525	1	21584585	G	A	0.006936	0.6404	0.5663	0.581089	0.581089	0.0741	1.12431
rs3765351	1	22445991	T	C	-0.01116	0.5056	0.551	0.362936	-0.362936	-0.0454	0.70559
rs2235547	1	23406485	G	C	-0.001181	0.5506	0.4592	2.26504	-2.26504	0.0914	-1.38923
rs10794523	1	26493171	A	G	0.01309	0.4663	0.5408	-0.170327	-0.170327	-0.0745	-1.1512
rs67215295	1	32428260	A	C	0.009196	NA	NA	-0.251179	-0.251179	NA	NA
rs190223154	1	33833211	A	G	-0.02123	NA	NA	-0.518652	0.518652	NA	NA
rs35343437	1	36773405	G	T	0.01377	NA	NA	1.55979	1.55979	NA	NA
rs11586828	1	38023822	A	G	0.01137	0.0618	0.03061	0.20689	0.20689	0.03119	0.467233
rs3795494	1	38271495	A	G	-0.01648	0.573	0.4541	1.54718	-1.54718	0.1189	-1.81034
rs35267671	1	38397369	T	C	-0.01592	NA	NA	0.188373	-0.188373	NA	NA
rs72661598	1	41421540	T	C	-0.01394	NA	NA	1.48481	-1.48481	NA	NA
rs213769	1	41615358	T	C	-0.01779	0.3933	0.5051	-0.733369	0.733369	-0.1118	1.72237
rs12143164	1	47974381	T	C	0.002057	NA	NA	-1.94014	-1.94014	NA	NA
rs4245660	1	78540733	T	C	0.004928	0.6348	0.5867	1.80542	1.80542	0.0481	0.726176
rs313746	1	86278315	G	A	0.007353	0.3258	0.4235	0.157883	0.157883	-0.0977	-1.50646
rs4411112	1	88607616	G	A	-0.004437	0.8876	0.8878	0.711089	-0.711089	-0.0002	0.0134419
rs7517539	1	93434725	A	G	-0.01198	0.8652	0.8112	0.00384055	-0.00384055	0.054	-0.816523
rs11164673	1	103575991	A	C	-0.01924	0.5337	0.4592	-1.24827	1.24827	0.0745	-1.13044
rs505058	1	156106185	C	T	0.02283	0.0618	0.1378	-0.952957	-0.952957	-0.076	-1.17417
rs114549212	1	171643255	T	G	0.0496	NA	NA	0.613784	0.613784	NA	NA
rs10158753	1	172087026	G	A	0.02477	0.5056	0.5051	-0.59127	-0.59127	0.0005	-0.00272283
rs10158839	1	172297343	G	C	0.003533	0.4157	0.6224	-1.92907	-1.92907	-0.2067	-3.17558
rs10752957	1	172408271	G	A	-0.01423	0.573	0.6224	-0.5488	0.5488	-0.0494	0.766842
rs72725279	1	172439399	A	G	0.01078	NA	NA	-0.0565022	-0.0565022	NA	NA
rs77472916	1	176306387	C	T	0.02837	NA	NA	-1.45778	-1.45778	NA	NA
rs10798489	1	176935711	C	T	-0.0112	NA	NA	0.137787	-0.137787	NA	NA
rs732812	1	184113245	C	T	0.01501	0.4775	0.4184	2.86174	2.86174	0.0591	0.894619
rs6698007	1	214624286	G	T	-0.005626	0.4607	0.4898	0.365283	-0.365283	-0.0291	0.455988
rs10495062	1	217804955	C	T	0.009822	0.4494	0.3929	1.75428	1.75428	0.0565	0.854806
rs3753592	1	218458058	C	T	0.007462	0.3876	0.3929	-0.536141	-0.536141	-0.0053	-0.0915383
rs3014274	1	227583800	G	A	0.01376	0.3876	0.4031	-0.034586	-0.034586	-0.0155	-0.247731
rs12408981	1	227596280	G	A	0.0192	0.5393	0.6327	-0.450696	-0.450696	-0.0934	-1.44061
rs7632	2	10194487	C	T	-0.01591	0.5337	0.4745	1.14845	-1.14845	0.0592	-0.896151
rs4666296	2	20352060	C	T	-0.01515	0.04494	0.02041	0.199697	-0.199697	0.02453	-0.365249
rs12466350	2	25239969	T	C	0.03237	0.4719	0.6173	-0.30729	-0.30729	-0.1454	-2.23689
rs10196664	2	25589466	G	A	0.01821	0.09551	0.09694	0.130533	0.130533	-0.00143	-0.0322769
rs4617998	2	28623047	C	T	0.01117	0.5449	0.5102	-0.150306	-0.150306	0.0347	0.520982
rs7583121	2	33341172	G	A	0.003066	0.4157	0.5102	0.883412	0.883412	-0.0945	-1.45746
rs78879228	2	33346387	G	T	-0.0262	NA	NA	-1.3656	1.3656	NA	NA
rs10495783	2	33401632	T	C	0.009596	0.5337	0.5255	-0.276105	-0.276105	0.0082	0.115187
rs41464348	2	33527299	A	G	-0.01198	NA	NA	0.667208	-0.667208	NA	NA
rs57489629	2	33554191	T	G	0.01061	NA	NA	-1.58592	-1.58592	NA	NA
rs1548894	2	36833861	A	G	0.009225	NA	NA	-1.20494	-1.20494	NA	NA
rs6732426	2	43587504	T	C	-0.002866	0.4888	0.5	0.201677	-0.201677	-0.0112	0.181885
rs896210	2	46746745	A	G	-0.01154	0.4663	0.4694	-1.42723	1.42723	-0.0031	0.0578497
rs17278148	2	55970143	C	T	0.02828	NA	NA	1.6847	1.6847	NA	NA
rs1077778	2	56123331	T	C	-0.0106	NA	NA	-0.38372	0.38372	NA	NA
rs17278890	2	56150349	C	T	-0.03789	0.05056	0.08163	-0.0308455	0.0308455	-0.03107	0.486154
rs6545537	2	56217834	A	G	0.01615	0.2865	0.2398	0.904739	0.904739	0.0467	0.704738
rs10179227	2	69330445	G	A	0.02117	0.1011	0.1327	-2.73264	-2.73264	-0.0316	-0.49427
rs67918421	2	105439281	T	G	-0.0115	NA	NA	-0.445404	0.445404	NA	NA
rs78482078	2	106019433	T	C	-0.0161	NA	NA	-0.0069857	0.0069857	NA	NA
rs4848126	2	121627175	G	A	-0.008193	0.5	0.5459	0.590148	-0.590148	-0.0459	0.713246
rs4667697	2	164448331	G	A	-0.03282	0.191	0.2704	-2.07802	2.07802	-0.0794	1.22623
rs524586	2	169737851	G	A	0.02062	0.5281	0.5	1.92017	1.92017	0.0281	0.419916
rs72885919	2	172418755	T	C	-0.005593	NA	NA	0.924388	-0.924388	NA	NA
rs35917062	2	191660828	A	G	-0.03521	NA	NA	0.198947	-0.198947	NA	NA
rs10931835	2	199696832	C	T	-0.007604	NA	NA	0.664013	-0.664013	NA	NA
rs13387042	2	217905832	G	A	0.01326	0.5281	0.5561	0.0972348	0.0972348	-0.028	-0.439144
rs12472818	2	218358312	C	T	-0.01148	0.6067	0.5663	-0.134154	0.134154	0.0404	-0.608266
rs10206984	2	219066980	T	C	0.008802	0.4719	0.5612	1.5617	1.5617	-0.0893	-1.37783
rs6436090	2	219669002	G	A	-0.01725	0.5506	0.5612	-0.486881	0.486881	-0.0106	0.172697
rs10197074	2	219706535	T	C	-0.01381	0.5	0.4541	-0.261799	0.261799	0.0459	-0.692488
rs11684531	2	219835489	G	A	-0.01513	NA	NA	-0.0702025	0.0702025	NA	NA
rs1127102	2	220037666	G	A	0.01392	0.5449	0.6582	-0.407653	-0.407653	-0.1133	-1.74534
rs2629046	2	225047744	C	T	-0.01882	0.4494	0.4031	0.0901229	-0.0901229	0.0463	-0.698613
rs12997147	2	225299163	T	C	0.01072	NA	NA	1.10119	1.10119	NA	NA
rs7576236	2	227241327	C	A	-0.008082	0.236	0.3112	-1.43561	1.43561	-0.0752	1.16192
rs2341320	2	232740108	T	C	0.02058	0.4663	0.3878	0.340724	0.340724	0.0785	1.19169
rs3107179	2	232788325	T	C	0.02216	0.573	0.5612	0.171914	0.171914	0.0118	0.170314
rs3116191	2	233049441	A	G	0.0102	NA	NA	0.498289	0.498289	NA	NA
rs1190462	2	233362267	T	C	-0.01147	0.1798	0.3163	-0.541078	0.541078	-0.1365	2.1006
rs11899983	2	233415978	C	T	-0.002143	NA	NA	-1.52182	1.52182	NA	NA
rs2592127	2	233791648	T	G	0.000745	NA	NA	0.718916	0.718916	NA	NA
rs1511536	3	24104259	T	C	-0.01008	0.2247	0.199	-0.481725	0.481725	0.0257	-0.383165
rs4426642	3	30074874	G	A	0.00687	0.573	0.5969	0.167836	0.167836	-0.0239	-0.37636
rs6787874	3	38000885	A	G	0.021	0.2247	0.2857	0.0826089	0.0826089	-0.061	-0.944473
rs6809294	3	52170862	C	G	0.007523	NA	NA	-0.291867	-0.291867	NA	NA
rs74489188	3	52608672	T	C	0.01733	NA	NA	1.49569	1.49569	NA	NA
rs2336725	3	53118739	T	C	-0.03024	0.5618	0.6173	-0.17417	0.17417	-0.0555	0.860251
rs13088281	3	53147576	A	C	0.02716	0.1067	0.1327	-0.492835	-0.492835	-0.026	-0.408518
rs4681994	3	56715363	C	T	-0.0123	0.4607	0.4031	-1.733	1.733	0.0576	-0.87165
rs11128264	3	72392310	T	C	-0.03522	0.4944	0.4694	0.377683	-0.377683	0.025	-0.372446
rs28637457	3	98681312	C	T	0.007023	NA	NA	2.47749	2.47749	NA	NA
rs2045688	3	112842598	A	G	-0.006055	0.5843	0.5816	1.45829	-1.45829	0.0027	-0.0309658
rs35593191	3	112851915	C	T	0.0123	NA	NA	1.23636	1.23636	NA	NA
rs9819254	3	123042315	T	C	-0.004958	0.5899	0.4949	1.03411	-1.03411	0.095	-1.44436
rs6795866	3	129064722	G	A	0.004045	NA	NA	-1.32123	-1.32123	NA	NA
rs4077158	3	133942941	C	T	0.008238	0.5056	0.602	-0.0491517	-0.0491517	-0.0964	-1.48655
rs1052618	3	136574501	G	A	-0.01529	0.6461	0.6837	1.2493	-1.2493	-0.0376	0.586148
rs2871887	3	141054579	T	C	0.03782	0.5169	0.449	-0.728542	-0.728542	0.0679	1.02937
rs114097136	3	141114013	G	C	0.03684	NA	NA	1.68745	1.68745	NA	NA
rs9825379	3	141137035	A	G	0.06178	0.0618	0.06122	-0.931263	-0.931263	0.00058	-0.00149779
rs73238079	3	141233904	A	G	-0.01862	NA	NA	-0.0720662	0.0720662	NA	NA
rs13063991	3	141293755	C	T	0.01168	NA	NA	0.727676	0.727676	NA	NA
rs1814982	3	147000266	C	T	-0.006566	0.4944	0.551	-0.590679	0.590679	-0.0566	0.877096
rs4680339	3	156835419	G	T	-0.01392	NA	NA	-0.838693	0.838693	NA	NA
rs6778370	3	158094422	T	C	-0.0158	0.573	0.4745	0.811575	-0.811575	0.0985	-1.49795
rs7652177	3	171969077	G	C	0.02121	0.4775	0.4541	1.89816	1.89816	0.0234	0.347945
rs565933	3	172069075	C	T	0.01824	NA	NA	1.47996	1.47996	NA	NA
rs2098771	3	185563274	A	G	-0.02837	0.6067	0.5969	-0.465219	0.465219	0.0098	-0.139688
rs1005099	3	187440506	A	C	-0.02059	0.6011	0.6224	0.657041	-0.657041	-0.0213	0.336546
rs6831256	4	3473139	G	A	-0.0116	0.4382	0.4133	-0.758699	0.758699	0.0249	-0.370915
rs4696701	4	8603895	C	T	-0.001508	NA	NA	0.698171	-0.698171	NA	NA
rs2540852	4	12860186	G	A	0.01003	0.3764	0.4133	0.123624	0.123624	-0.0369	-0.575429
rs1040056	4	13003758	T	G	-0.009482	0.5562	0.5357	0.659563	-0.659563	0.0205	-0.303537
rs6851567	4	13207050	G	A	0.009846	0.382	0.3214	-0.0696796	-0.0696796	0.0606	0.917589
rs16895705	4	17780716	G	T	-0.02217	NA	NA	-0.994592	0.994592	NA	NA
rs3988	4	18241903	G	A	-0.0108	NA	NA	-1.20112	1.20112	NA	NA
rs2066789	4	39308187	A	G	0.01903	0.6348	0.5918	0.287039	0.287039	0.043	0.64808
rs3733309	4	57857188	G	A	0.0006715	0.1629	0.1173	1.25398	1.25398	0.0456	0.687894
rs7697556	4	73515313	C	T	-0.02407	0.5843	0.6071	-0.785793	0.785793	-0.0228	0.359516
rs11729800	4	73541684	G	A	0.03305	NA	NA	-0.239421	-0.239421	NA	NA
rs71596054	4	82067283	C	T	-0.00504	NA	NA	0.0357396	-0.0357396	NA	NA
rs6851443	4	82313686	C	T	0.0241	NA	NA	-0.481475	-0.481475	NA	NA
rs4395467	4	88645344	T	C	0.003215	NA	NA	2.36302	2.36302	NA	NA
rs2726459	4	106184597	C	A	0.002671	0.5618	0.4949	0.38095	0.38095	0.0669	1.01406
rs4449484	4	109458724	T	G	0.01079	0.5449	0.4643	-0.629966	-0.629966	0.0806	1.22385
rs4240263	4	122683623	T	C	6.725e-05	NA	NA	1.79422	1.79422	NA	NA
rs4629389	4	145205246	C	T	-0.005456	NA	NA	1.56626	-1.56626	NA	NA
rs9998052	4	146022891	C	T	0.01561	0.05056	0.07653	0.116712	0.116712	-0.02597	-0.408058
rs11545157	4	146055117	C	T	-0.03567	NA	NA	-0.297396	0.297396	NA	NA
rs6839437	4	146174631	C	T	0.01073	NA	NA	-0.691549	-0.691549	NA	NA
rs10028410	4	152606573	C	T	-0.005394	NA	NA	1.52723	-1.52723	NA	NA
rs7715779	5	32690199	G	T	0.006485	NA	NA	0.969245	0.969245	NA	NA
rs3828586	5	32746547	G	A	0.007204	0.3034	0.3776	-0.899119	-0.899119	-0.0742	-1.1466
rs1173756	5	32789852	C	T	-0.003161	0.5281	0.5153	-0.158441	0.158441	0.0128	-0.185627
rs10472831	5	32935984	A	G	-0.003807	0.3315	0.3367	-0.674093	0.674093	-0.0052	0.090007
rs4049387	5	33014441	G	T	0.0186	NA	NA	0.422345	0.422345	NA	NA
rs56832651	5	37669030	C	T	0.008177	NA	NA	0.353512	0.353512	NA	NA
rs28698773	5	39436244	C	A	-0.01154	NA	NA	-0.0777007	0.0777007	NA	NA
rs7705834	5	42513906	A	G	0.008479	NA	NA	-0.0934776	-0.0934776	NA	NA
rs72754961	5	42654804	C	G	-0.007272	NA	NA	-0.622556	0.622556	NA	NA
rs62372052	5	42724294	G	A	0.0205	NA	NA	1.03797	1.03797	NA	NA
rs4866968	5	42851183	C	G	0.02096	0.6236	0.4898	-0.0241915	-0.0241915	0.1338	2.0385
rs3804264	5	54742941	A	G	-0.0153	0.6573	0.5918	-1.208	1.208	0.0655	-0.992623
rs6870832	5	55016978	A	G	-0.0179	NA	NA	-0.255269	0.255269	NA	NA
rs2662024	5	56257515	C	T	-0.01413	0.3933	0.3878	-0.914692	0.914692	0.0055	-0.0738422
rs1366594	5	88376061	C	A	-0.02829	0.4719	0.4898	0.310728	-0.310728	-0.0179	0.284482
rs6871239	5	108073934	A	C	0.01647	0.5955	0.5459	0.531676	0.531676	0.0496	0.749146
rs840464	5	121417463	T	G	-0.001156	0.573	0.5612	-1.16248	1.16248	0.0118	-0.170314
rs1582931	5	122657199	A	G	-0.008494	0.5337	0.5357	-1.25859	1.25859	-0.002	0.0410054
rs31467	5	131436838	T	C	0.009449	0.5169	0.4643	2.53405	2.53405	0.0526	0.795085
rs11242110	5	131743777	T	G	0.02917	0.5056	0.4949	2.20779	2.20779	0.0107	0.15347
rs2084007	5	133891282	T	C	-0.0245	0.4944	0.4847	-0.00712085	0.00712085	0.0097	-0.138157
rs73790670	5	139034143	A	G	0.0515	NA	NA	0.335374	0.335374	NA	NA
rs258747	5	142656813	G	A	0.006301	0.573	0.6071	1.52031	1.52031	-0.0341	-0.532553
rs3884606	5	170871074	A	G	-0.01375	NA	NA	-0.703825	0.703825	NA	NA
rs3822730	5	171174254	C	G	-0.01324	0.5618	0.551	0.310241	-0.310241	0.0108	-0.155001
rs33855	5	171192037	A	G	0.01428	0.4213	0.4082	2.20684	2.20684	0.0131	0.190221
rs55795753	5	171442208	T	G	0.01351	NA	NA	0.738958	0.738958	NA	NA
rs116022622	5	172763797	G	T	0.004125	NA	NA	0.477413	0.477413	NA	NA
rs72824205	5	173046388	T	G	-0.008089	NA	NA	-1.36139	1.36139	NA	NA
rs11135004	5	176285598	T	C	-0.0004762	0.8427	0.7755	0.464151	-0.464151	0.0672	-1.01865
rs55700967	5	176456580	C	T	-0.01089	NA	NA	0.633717	-0.633717	NA	NA
rs6601003	5	178434993	G	A	0.008259	NA	NA	0.1294	0.1294	NA	NA
rs761390	6	2189312	T	C	-0.0147	0.3933	0.3622	0.107971	-0.107971	0.0311	-0.465855
rs12198986	6	7720059	A	G	0.03693	0.4888	0.4745	1.71439	1.71439	0.0143	0.208597
rs270416	6	7730836	G	A	0.001487	NA	NA	1.52701	1.52701	NA	NA
rs2068361	6	7736743	T	C	-0.03242	0.2303	0.3214	-0.959356	0.959356	-0.0911	1.40539
rs9406060	6	7798831	T	C	0.003222	0.5281	0.4592	0.788636	0.788636	0.0689	1.04469
rs11962800	6	7886905	G	A	-0.01433	0.09551	0.1173	-0.921364	0.921364	-0.02179	0.34405
rs6926229	6	19828213	C	T	0.0115	0.5449	0.5663	-0.118612	-0.118612	-0.0214	-0.338078
rs6919858	6	19836015	A	G	0.009089	NA	NA	-0.392307	-0.392307	NA	NA
rs1407045	6	26476155	G	A	0.01702	0.427	0.5255	0.027165	0.027165	-0.0985	-1.51871
rs2229642	6	33659472	G	C	0.02592	0.3876	0.4592	0.378913	0.378913	-0.0716	-1.10679
rs114014640	6	34370604	G	T	0.02528	NA	NA	3.14525	3.14525	NA	NA
rs2395626	6	35422754	T	G	0.007715	0.5955	0.5306	-0.79456	-0.79456	0.0649	0.983435
rs78498719	6	35437113	G	C	-0.03576	NA	NA	0.264132	-0.264132	NA	NA
rs11758653	6	35461800	A	G	-0.0343	NA	NA	-0.386163	0.386163	NA	NA
rs78945013	6	35487659	T	C	0.03534	NA	NA	0.24853	0.24853	NA	NA
rs2766554	6	35719327	T	C	0.008788	0.5393	0.4949	-0.149418	-0.149418	0.0444	0.669518
rs3748045	6	36198577	C	G	-0.0198	0.6124	0.6276	1.16389	-1.16389	-0.0152	0.243137
rs3778448	6	39163201	G	A	-0.008485	0.3371	0.3622	0.977367	-0.977367	-0.0251	0.394736
rs10948183	6	44880881	C	T	-0.01339	0.5562	0.5561	-1.33588	1.33588	0.0001	0.00884803
rs1727638	6	72139572	A	G	0.009838	0.4382	0.4031	0.486154	0.486154	0.0351	0.527107
rs1321845	6	80575820	T	C	0.002971	NA	NA	-1.76045	-1.76045	NA	NA
rs560400	6	81589005	T	C	-0.017	0.382	0.4796	-1.23247	1.23247	-0.0976	1.50493
rs1159915	6	81838308	G	T	-0.01413	NA	NA	-1.6946	1.6946	NA	NA
rs915125	6	82463376	T	C	-0.01539	0.2865	0.3571	0.154323	-0.154323	-0.0706	1.09148
rs6939647	6	85423176	T	G	-0.009567	0.5337	0.5102	1.38974	-1.38974	0.0235	-0.349476
rs2499667	6	105319125	A	G	-0.002989	0.4775	0.5408	-1.70356	1.70356	-0.0633	0.979693
rs221615	6	105483327	G	A	-0.009232	NA	NA	-1.17491	1.17491	NA	NA
rs9384679	6	108864419	T	C	-0.01932	0.3989	0.5	-0.867685	0.867685	-0.1011	1.55852
rs984258	6	117268237	C	T	-0.0004971	0.5	0.4031	0.550129	-0.550129	0.0969	-1.47345
rs1405210	6	117522685	T	C	-0.0001756	0.427	0.4643	0.321844	-0.321844	-0.0373	0.581555
rs1159974	6	126090277	C	T	0.0001586	0.5506	0.4694	0.296181	0.296181	0.0812	1.23304
rs6902109	6	130316559	G	A	-0.01857	0.6067	0.5918	-1.2133	1.2133	0.0149	-0.217784
rs12527906	6	131112116	C	A	-0.002029	0.4157	0.4184	-1.26651	1.26651	-0.0027	0.0517245
rs150462	6	133746648	A	C	-0.002557	NA	NA	0.0567561	-0.0567561	NA	NA
rs12216113	6	142301831	G	A	-0.01289	0.3034	0.5153	-2.49599	2.49599	-0.2119	3.25521
rs225680	6	142520393	C	T	0.003503	NA	NA	1.83156	1.83156	NA	NA
rs4896582	6	142703877	A	G	-0.03601	0.309	0.3776	-3.57858	3.57858	-0.0686	1.06085
rs76057999	6	142830370	T	A	0.003754	NA	NA	0.81316	0.81316	NA	NA
rs263158	6	142909049	T	G	-0.0254	0.4213	0.5153	-0.524763	0.524763	-0.094	1.4498
rs62430680	6	143083179	G	A	-0.001181	NA	NA	-0.188435	0.188435	NA	NA
rs116928060	6	151891388	A	C	0.01727	NA	NA	1.02659	1.02659	NA	NA
rs9340835	6	152199931	A	G	0.01047	0.3708	0.301	0.984285	0.984285	0.0698	1.05847
rs926779	6	152355920	A	G	0.01479	0.2303	0.2806	-0.879775	-0.879775	-0.0503	-0.780624
rs2818063	6	156576135	C	T	0.02308	0.1011	0.05612	1.30489	1.30489	0.04498	0.6784
rs9365939	6	166336825	G	A	-0.01852	NA	NA	1.03757	-1.03757	NA	NA
rs2305089	6	166579270	T	C	-0.009856	0.4944	0.4592	-0.378978	0.378978	0.0352	-0.528639
rs10950842	7	2753929	C	A	0.01779	0.4213	0.5	-0.719454	-0.719454	-0.0787	-1.21551
rs38014	7	8044268	C	T	0.01662	0.4101	0.4592	0.166927	0.166927	-0.0491	-0.762248
rs34058374	7	18008582	A	G	-0.02227	NA	NA	1.25679	-1.25679	NA	NA
rs11767221	7	19609643	G	A	-0.0133	0.691	0.6429	1.65758	-1.65758	0.0481	-0.726176
rs2214441	7	20392374	G	A	0.002682	NA	NA	0.462531	0.462531	NA	NA
rs58462233	7	28260507	A	G	0.01051	NA	NA	0.00687356	0.00687356	NA	NA
rs6946478	7	28755250	G	A	-0.01528	NA	NA	-0.071226	0.071226	NA	NA
rs2598104	7	37977249	C	T	-0.01962	NA	NA	-1.05068	1.05068	NA	NA
rs1524058	7	38136277	C	T	0.02211	0.5618	0.4949	0.903301	0.903301	0.0669	1.01406
rs1486139	7	46275728	G	A	0.006196	0.5393	0.5357	-0.903343	-0.903343	0.0036	0.0447475
rs723149	7	46577056	G	A	-0.01734	0.6067	0.4898	0.0431402	-0.0431402	0.1169	-1.77971
rs17172718	7	46604821	G	C	-0.003658	0.1573	0.1378	0.735494	-0.735494	0.0195	-0.288224
rs1128349	7	73097654	T	C	0.00528	0.4663	0.4082	-0.292021	-0.292021	0.0581	0.879306
rs6960257	7	73302272	G	A	-0.02308	NA	NA	1.85965	-1.85965	NA	NA
rs42042	7	92247112	T	C	0.03941	0.4944	0.5	-0.551282	-0.551282	-0.0056	-0.0961322
rs78366656	7	92429310	T	C	0.04012	NA	NA	0.658098	0.658098	NA	NA
rs57337700	7	92471221	C	T	0.02197	NA	NA	-0.97599	-0.97599	NA	NA
rs13240305	7	92576833	G	A	-0.03424	0.1292	0.08163	1.61024	-1.61024	0.04757	-0.71806
rs6962772	7	99081730	G	A	0.009058	0.1461	0.1582	0.830605	0.830605	-0.0121	-0.195667
rs10237306	7	121955981	T	G	0.007865	NA	NA	-0.195204	-0.195204	NA	NA
rs7793333	7	135003130	C	T	0.006691	NA	NA	0.443855	0.443855	NA	NA
rs6948145	7	135134802	C	A	-0.02671	0.07303	0.1173	0.247885	-0.247885	-0.04427	0.688286
rs273995	7	137629146	T	C	-0.002406	0.4663	0.4745	0.571682	-0.571682	-0.0082	0.135946
rs4726718	7	139926088	C	T	-0.00882	NA	NA	-1.83049	1.83049	NA	NA
rs62505455	7	148664720	G	A	0.0199	NA	NA	-0.224442	-0.224442	NA	NA
rs6947302	7	148869495	C	T	-0.01119	0.1517	0.1173	0.200268	-0.200268	0.0344	-0.516388
rs7787577	7	150521026	G	A	0.005806	0.07865	0.08673	2.08199	2.08199	-0.00808	-0.134108
rs3807375	7	150667210	T	C	-0.009183	0.309	0.3673	-0.530056	0.530056	-0.0583	0.903128
rs743507	7	150707488	T	C	0.007984	0.7303	0.6224	-0.409208	-0.409208	0.1079	1.64189
rs113698072	8	8781000	T	G	0.01672	NA	NA	0.917075	0.917075	NA	NA
rs67035513	8	13016379	A	G	0.004555	NA	NA	-1.32004	-1.32004	NA	NA
rs899428	8	21770763	C	T	0.007318	0.5899	0.6173	1.73405	1.73405	-0.0274	-0.429956
rs896378	8	22262321	C	T	0.001508	0.4775	0.4643	1.09283	1.09283	0.0132	0.191752
rs732563	8	23345526	C	T	0.02421	0.5337	0.5918	0.518885	0.518885	-0.0581	-0.900065
rs11135782	8	24104597	G	T	-0.02135	0.5843	0.5357	-0.211978	0.211978	0.0486	-0.733833
rs79467047	8	24194469	A	G	-0.01954	NA	NA	1.14787	-1.14787	NA	NA
rs11775903	8	25321076	G	A	0.01124	0.4157	0.4541	1.03367	1.03367	-0.0384	-0.598399
rs3750259	8	49647910	A	C	-0.01143	0.5843	0.551	-0.443892	0.443892	0.0333	-0.499544
rs2719267	8	56874017	T	C	-0.01335	0.4326	0.4796	-1.0306	1.0306	-0.047	0.730091
rs2609976	8	57399850	T	G	0.0211	0.4045	0.4949	0.352883	0.352883	-0.0904	-1.39468
rs1972688	8	57645857	A	G	0.0137	0.8764	0.8214	0.668316	0.668316	0.055	0.831836
rs61729527	8	77761919	T	C	-0.01424	NA	NA	0.742565	-0.742565	NA	NA
rs17449553	8	78043790	C	T	0.01639	0.5674	0.5	0.813241	0.813241	0.0674	1.02172
rs1788161	8	100696695	T	A	0.01435	NA	NA	-0.72948	-0.72948	NA	NA
rs4876662	8	117556270	G	A	-0.004851	0.8034	0.7857	-2.19663	2.19663	0.0177	-0.260661
rs10283100	8	120596023	G	A	0.02635	0.97753	0.94898	-0.23955	-0.23955	0.02855	0.426807
rs1467044	8	120887041	A	G	-0.006996	0.5393	0.6173	-0.190766	0.190766	-0.078	1.20479
rs3802266	8	123985708	G	A	0.008053	0.4382	0.5408	2.24309	2.24309	-0.1026	-1.58149
rs2001945	8	126477978	C	G	0.007663	0.573	0.5255	-0.703825	-0.703825	0.0475	0.716989
rs6987702	8	126504726	C	T	-0.004764	0.3146	0.1837	2.27207	-2.27207	0.1309	-1.99409
rs4144738	8	130760850	G	A	-0.01602	0.4382	0.5459	-1.47399	1.47399	-0.1077	1.65959
rs73406807	8	130763236	A	G	-0.02242	NA	NA	-0.12892	0.12892	NA	NA
rs6986601	8	131026260	G	A	-0.0005459	NA	NA	-0.935548	0.935548	NA	NA
rs10106924	8	135545718	T	G	-0.003331	0.7697	0.7347	1.43427	-1.43427	0.035	-0.525576
rs17699359	8	135654702	C	T	-0.01702	0.3876	0.4184	-1.3361	1.3361	-0.0308	0.48202
rs10505629	8	135708614	C	T	0.00158	0.1011	0.1378	0.0927387	0.0927387	-0.0367	-0.572367
rs13282319	8	135742240	C	T	0.001157	0.8596	0.8265	0.833346	0.833346	0.0331	0.496481
rs7828209	8	135794496	T	C	-0.006519	0.5281	0.648	-1.86522	1.86522	-0.1199	1.84641
rs7386745	8	142359368	C	T	-0.003947	0.5225	0.5102	0.57287	-0.57287	0.0123	-0.177971
rs1556032	9	14446001	T	C	0.007142	0.4157	0.4541	0.87911	0.87911	-0.0384	-0.598399
rs3927536	9	16787670	T	C	0.00766	0.8034	0.7398	2.36243	2.36243	0.0636	0.963528
rs966097	9	78810344	C	T	-0.01318	0.3539	0.2857	-0.582755	0.582755	0.0682	-1.03397
rs918223	9	86411840	G	A	-0.00982	0.6011	0.5612	1.05279	-1.05279	0.0399	-0.60061
rs1572030	9	86571611	G	A	0.01131	0.5674	0.6378	-0.620344	-0.620344	-0.0704	-1.08842
rs1929800	9	88987031	C	T	0.004034	NA	NA	1.48848	1.48848	NA	NA
rs353787	9	89098390	A	C	0.01007	0.4719	0.5306	0.409414	0.409414	-0.0587	-0.909253
rs277755	9	89772413	A	C	0.007346	0.5056	0.5714	-0.510495	-0.510495	-0.0658	-1.01798
rs80280541	9	90853162	C	T	0.00613	NA	NA	1.4064	1.4064	NA	NA
rs7859829	9	90890583	A	G	0.01531	0.91011	0.97449	0.262761	0.262761	-0.06438	-0.996231
rs10761364	9	97768286	C	T	0.01534	0.8427	0.93367	-0.123059	-0.123059	-0.09097	-1.4034
rs372958	9	98142505	T	C	0.01527	NA	NA	-0.513435	-0.513435	NA	NA
rs357564	9	98209594	A	G	-0.03343	0.309	0.3316	-0.124455	0.124455	-0.0226	0.356453
rs16909974	9	98306920	G	A	0.03159	NA	NA	0.842214	0.842214	NA	NA
rs10985640	9	98365343	G	A	0.01328	0.3989	0.5204	-1.29661	-1.29661	-0.1215	-1.87091
rs72754383	9	98403582	A	G	0.01688	NA	NA	-0.32852	-0.32852	NA	NA
rs10820751	9	98432200	A	G	0.007958	0.1573	0.1633	0.453013	0.453013	-0.006	-0.102257
rs636311	9	98698810	T	C	0.03189	0.90449	0.92857	-2.03905	-2.03905	-0.02408	-0.379117
rs10990407	9	99078886	T	C	-0.01111	0.08989	0.09694	-0.208217	0.208217	-0.00705	0.118336
rs7861820	9	108936674	C	T	-0.02245	0.4382	0.5408	-1.96293	1.96293	-0.1026	1.58149
rs884975	9	109177722	A	G	0.01654	0.4888	0.4898	0.0401285	0.0401285	-0.001	-0.0256923
rs725773	9	109519849	T	C	0.01779	0.264	0.2959	-1.63069	-1.63069	-0.0319	-0.498864
rs7858184	9	109538577	G	T	0.02253	0.1124	0.07653	1.32873	1.32873	0.03587	0.538898
rs10759200	9	109546235	C	T	0.01208	0.8764	0.8571	0.77466	0.77466	0.0193	0.285162
rs2110548	9	113782934	G	C	-0.005574	0.5169	0.5459	-1.43279	1.43279	-0.029	0.454457
rs7047400	9	118551464	G	A	0.01686	0.91011	0.8265	1.17209	1.17209	0.08361	1.26994
rs9409175	9	118656886	C	T	0.005925	0.5056	0.4082	0.74297	0.74297	0.0974	1.48111
rs79246332	9	118944438	A	C	0.01181	NA	NA	0.650263	0.650263	NA	NA
rs1885983	9	119078356	G	A	0.01928	0.6348	0.7602	-0.113783	-0.113783	-0.1254	-1.93063
rs10760176	9	124204563	T	C	-0.0005763	0.573	0.5153	-0.0304932	0.0304932	0.0577	-0.873181
rs7873499	9	128592201	G	A	-0.007042	NA	NA	-0.203227	0.203227	NA	NA
rs944604	9	133424020	T	C	-0.01412	0.5393	0.5663	-1.11233	1.11233	-0.027	0.423831
rs2304811	9	133501642	A	G	0.03134	0.1461	0.08163	1.06585	1.06585	0.06447	0.97685
rs1890599	9	133537672	A	G	-0.01261	0.4157	0.551	-1.37617	1.37617	-0.1353	2.08223
rs7909670	10	12918764	T	C	-0.01855	0.4663	0.449	-0.723431	0.723431	0.0173	-0.254536
rs7893462	10	28228865	G	A	0.009489	0.5337	0.5408	-1.03868	-1.03868	-0.0071	-0.119102
rs4749330	10	28932128	A	G	-0.02174	NA	NA	-0.111535	0.111535	NA	NA
rs541137	10	29496790	C	T	-0.02024	0.3876	0.2857	0.843241	-0.843241	0.1019	-1.55002
rs2038916	10	53262141	G	A	-0.003834	0.4045	0.398	-1.10803	1.10803	0.0065	-0.0891552
rs10822184	10	65337153	C	T	0.01177	NA	NA	0.648246	0.648246	NA	NA
rs4142048	10	70044031	C	T	-0.007409	0.1685	0.1531	0.504768	-0.504768	0.0154	-0.225441
rs1463597	10	81139141	G	A	-0.02108	NA	NA	-0.296626	0.296626	NA	NA
rs78169109	10	89849352	A	G	-0.004695	NA	NA	1.17333	-1.17333	NA	NA
rs11599170	10	97886086	G	A	-0.01442	0.4719	0.4694	0.767571	-0.767571	0.0025	-0.0279032
rs10883563	10	102684380	A	C	0.0128	0.5506	0.5867	-1.06522	-1.06522	-0.0361	-0.563179
rs12763284	10	104508202	G	A	0.00805	0.4326	0.4847	-0.44333	-0.44333	-0.0521	-0.808187
rs34851615	10	120512489	A	G	-0.008992	NA	NA	-0.355915	0.355915	NA	NA
rs6585827	10	124165615	A	G	0.003772	0.4719	0.4082	0.225104	0.225104	0.0637	0.965059
rs11245297	10	126259948	A	G	-0.01478	0.5225	0.4337	0.489422	-0.489422	0.0888	-1.34942
rs1971929	11	2773371	C	G	0.03772	0.118	0.09184	-0.140094	-0.140094	0.02616	0.390209
rs7926971	11	12698040	G	A	0.01695	0.5225	0.3673	-0.247101	-0.247101	0.1552	2.3662
rs61884049	11	14469598	T	C	0.02776	NA	NA	1.36739	1.36739	NA	NA
rs7946010	11	17176057	A	G	-0.01755	0.5843	0.4796	0.922795	-0.922795	0.1047	-1.59289
rs10832948	11	18628730	A	G	-0.01566	0.4157	0.3929	0.279182	-0.279182	0.0228	-0.338757
rs487742	11	30454395	A	G	0.01456	NA	NA	0.619967	0.619967	NA	NA
rs1625595	11	66078129	T	C	0.01196	0.5393	0.4796	-1.49153	-1.49153	0.0597	0.903807
rs56088284	11	66899619	G	A	-0.09209	NA	NA	1.57893	-1.57893	NA	NA
rs901827	11	68030015	T	C	-0.004754	0.4775	0.3367	-0.568333	0.568333	0.1408	-2.14569
rs12363547	11	68843119	A	G	-0.006389	NA	NA	-0.132609	0.132609	NA	NA
rs11233117	11	69924352	G	C	-0.004346	NA	NA	-0.177459	0.177459	NA	NA
rs4044287	11	74267187	C	T	0.01138	NA	NA	-0.0990872	-0.0990872	NA	NA
rs10899042	11	74443090	G	A	3.645e-05	0.4944	0.4235	1.48269	1.48269	0.0709	1.07531
rs614604	11	75281209	G	A	-0.02349	0.5674	0.5816	0.491936	-0.491936	-0.0142	0.227824
rs7938474	11	95358797	G	A	0.004432	0.3258	0.3571	-0.0400431	-0.0400431	-0.0313	-0.489676
rs6589964	11	122870683	C	A	0.01189	0.5506	0.5612	-0.307313	-0.307313	-0.0106	-0.172697
rs7945677	11	128499905	C	T	0.01404	0.5449	0.4898	0.317637	0.317637	0.0551	0.833367
rs74576293	12	3351169	C	T	0.01716	NA	NA	-0.0177385	-0.0177385	NA	NA
rs10491967	12	3368093	A	G	0.02518	0.1011	0.148	-1.02676	-1.02676	-0.0469	-0.728559
rs2532530	12	4039851	A	C	-0.005978	NA	NA	-0.299301	0.299301	NA	NA
rs7132012	12	8832203	G	A	0.01032	0.2753	0.3367	0.144237	0.144237	-0.0614	-0.950598
rs7303518	12	11906034	G	C	-0.0171	NA	NA	-0.755008	0.755008	NA	NA
rs2066827	12	12871099	G	T	-0.01899	0.2191	0.2551	0.348282	-0.348282	-0.036	0.561648
rs76365233	12	12885173	G	C	-0.03078	NA	NA	0.37272	-0.37272	NA	NA
rs1600	12	14656768	C	G	-0.006163	0.4831	0.5	0.861332	-0.861332	-0.0169	0.269169
rs7313164	12	14812266	C	T	0.01122	NA	NA	0.359726	0.359726	NA	NA
rs7959540	12	14955702	A	T	-0.005338	0.5787	0.5867	-0.277145	0.277145	-0.008	0.132883
rs4326884	12	20536371	A	G	0.001778	0.573	0.4541	0.685523	0.685523	0.1189	1.81034
rs11045385	12	20831714	C	T	-0.02056	NA	NA	-1.27181	1.27181	NA	NA
rs16926804	12	24019613	T	A	-0.01906	0.4831	0.5102	0.41979	-0.41979	-0.0271	0.425362
rs6487659	12	28221974	G	A	-0.006175	NA	NA	1.21	-1.21	NA	NA
rs7968563	12	28716777	C	T	0.01226	NA	NA	-0.589394	-0.589394	NA	NA
rs7309866	12	29244346	T	C	-0.00444	NA	NA	-1.15543	1.15543	NA	NA
rs7303323	12	47145151	C	T	0.01888	NA	NA	1.08843	1.08843	NA	NA
rs2020854	12	56743367	C	T	0.006732	0.04494	0.09184	0.243409	0.243409	-0.0469	-0.728559
rs4553410	12	58301211	A	G	-0.009936	NA	NA	0.420567	-0.420567	NA	NA
rs1690278	12	65133644	G	C	-0.006026	0.4831	0.5204	-0.00205023	0.00205023	-0.0373	0.581555
rs7309476	12	65487695	C	A	0.0006245	0.5337	0.6429	-1.12678	-1.12678	-0.1092	-1.68256
rs61921506	12	65856899	T	C	0.01442	NA	NA	0.235888	0.235888	NA	NA
rs11175915	12	66169943	G	C	0.03103	0.06742	0.07653	0.901449	0.901449	-0.00911	-0.149881
rs77927863	12	66265118	T	C	-0.01276	NA	NA	-1.49859	1.49859	NA	NA
rs1042725	12	66358347	T	C	-0.0411	0.5449	0.5663	-1.83156	1.83156	-0.0214	0.338078
rs1042729	12	66358571	A	C	-0.03616	NA	NA	-1.07233	1.07233	NA	NA
rs4026608	12	66394664	T	C	0.01172	0.6629	0.6173	0.940207	0.940207	0.0456	0.687894
rs2870782	12	66496869	G	T	0.0246	0.3933	0.3776	0.440231	0.440231	0.0157	0.230035
rs2924135	12	69931759	A	G	0.01175	0.573	0.5	0.82759	0.82759	0.073	1.10747
rs4761350	12	77511309	T	G	-0.01481	0.5169	0.5408	0.00735441	-0.00735441	-0.0239	0.37636
rs7137132	12	77642583	C	A	0.003119	NA	NA	-0.721948	-0.721948	NA	NA
rs7953529	12	92505848	C	T	-0.001515	NA	NA	0.631049	-0.631049	NA	NA
rs7975732	12	93899076	G	A	0.01531	0.3989	0.3214	1.22943	1.22943	0.0775	1.17638
rs7953508	12	93983554	T	C	0.0285	0.2697	0.25	-0.511379	-0.511379	0.0197	0.291287
rs4144501	12	94156587	A	G	-0.01227	NA	NA	0.859119	-0.859119	NA	NA
rs3847787	12	94207532	A	G	-0.01135	NA	NA	1.14612	-1.14612	NA	NA
rs10777858	12	97792745	T	G	-0.01085	NA	NA	-0.416772	0.416772	NA	NA
rs7131821	12	102367168	G	A	-0.0294	NA	NA	0.135717	-0.135717	NA	NA
rs7309412	12	103073093	A	C	0.0111	0.4494	0.3929	2.2013	2.2013	0.0565	0.854806
rs7974499	12	107341385	C	T	-0.01838	0.5	0.5816	-0.0248281	0.0248281	-0.0816	1.25992
rs7313445	12	107445881	A	G	-0.02167	NA	NA	0.421677	-0.421677	NA	NA
rs11616067	12	116393174	G	A	-0.00754	0.264	0.2092	0.744259	-0.744259	0.0548	-0.828774
rs3213566	12	121222578	C	T	-0.00278	0.5056	0.5663	-0.171379	0.171379	-0.0607	0.939879
rs6489191	12	123154039	G	A	-0.002428	NA	NA	-1.59447	1.59447	NA	NA
rs28434767	12	123921264	T	G	0.003773	NA	NA	-0.521343	-0.521343	NA	NA
rs11057382	12	124362889	T	C	-0.02055	NA	NA	-0.0179177	0.0179177	NA	NA
rs4765544	12	124802638	A	G	-0.01113	0.5955	0.5918	-1.54415	1.54415	0.0037	-0.0462788
rs172179	13	30177337	C	G	-0.01043	0.6124	0.6173	-0.186187	0.186187	-0.0049	0.0854131
rs2755209	13	41137804	C	A	-0.004056	0.4101	0.449	-0.665034	0.665034	-0.0389	0.606055
rs2066593	13	50721117	C	T	-0.01373	0.5112	0.5357	0.289424	-0.289424	-0.0245	0.385548
rs706606	13	50833707	C	T	-0.01806	0.5337	0.5204	-1.66537	1.66537	0.0133	-0.193284
rs1239947	13	51106555	T	C	-0.005743	0.6517	0.6633	-0.390763	0.390763	-0.0116	0.18801
rs3812852	13	73631873	G	A	-0.01444	0.05618	0.08163	-0.302392	0.302392	-0.02545	0.400095
rs61967425	13	73731214	G	C	-0.0262	NA	NA	0.616566	-0.616566	NA	NA
rs8002779	13	92015977	A	G	-0.009654	0.5562	0.6173	-0.192454	0.192454	-0.0611	0.946004
rs977870	14	23725147	T	G	-0.003862	0.4775	0.5663	0.263435	-0.263435	-0.0888	1.37017
rs35759537	14	23749037	T	C	0.006356	NA	NA	-0.5372	-0.5372	NA	NA
rs36226649	14	24835500	C	T	0.03302	NA	NA	0.267539	0.267539	NA	NA
rs11629005	14	24860887	C	T	-0.007675	0.4944	0.4337	0.525282	-0.525282	0.0607	-0.91912
rs11158025	14	55279763	T	C	0.006579	NA	NA	1.01216	1.01216	NA	NA
rs1252989	14	59679186	G	A	-0.01411	0.4382	0.4184	-0.155781	0.155781	0.0198	-0.292818
rs45512391	14	64988830	A	C	-0.01075	NA	NA	1.92125	-1.92125	NA	NA
rs8016522	14	70490799	A	G	0.01614	0.4494	0.3878	1.31201	1.31201	0.0616	0.932902
rs11466414	14	76447850	A	G	-0.00869	0.05056	0.03061	2.7118	-2.7118	0.01995	-0.295115
rs8007661	14	92459958	T	C	-0.03697	0.4775	0.4286	1.68572	-1.68572	0.0489	-0.738427
rs6575304	14	93404674	C	T	-0.004883	0.4888	0.5765	-1.13302	1.13302	-0.0877	1.35333
rs35502373	14	93407134	T	C	0.0207	NA	NA	-0.0947889	-0.0947889	NA	NA
rs35306951	14	94873695	G	C	0.01175	NA	NA	-0.337473	-0.337473	NA	NA
rs10141157	14	104018105	C	T	-0.02351	0.5225	0.4796	-0.472136	0.472136	0.0429	-0.646549
rs12592845	15	48684958	T	C	-0.05019	0.08989	0.07143	-0.446988	0.446988	0.01846	-0.272299
rs2042747	15	48728634	T	C	0.01909	0.7416	0.7857	0.296611	0.296611	-0.0441	-0.685683
rs2414078	15	51220390	G	A	0.02205	NA	NA	-0.87574	-0.87574	NA	NA
rs700518	15	51529112	C	T	0.01276	0.5393	0.4439	1.35047	1.35047	0.0954	1.45048
rs4775445	15	62155282	G	A	-0.003505	0.4101	0.4643	-0.306821	0.306821	-0.0542	0.840344
rs755450	15	67035153	G	A	-0.02856	0.5281	0.6276	1.40746	-1.40746	-0.0995	1.53402
rs7167676	15	74080021	G	T	0.01547	NA	NA	-1.1497	-1.1497	NA	NA
rs750460	15	74241506	A	G	-0.02904	0.4438	0.4694	0.893015	-0.893015	-0.0256	0.402392
rs9783698	15	74548773	A	G	0.001521	0.2697	0.2857	1.17663	1.17663	-0.016	-0.255387
rs79604958	15	75929991	C	G	0.02168	NA	NA	0.124585	0.124585	NA	NA
rs869302	15	77830430	C	T	-0.017	0.3989	0.4133	-0.340276	0.340276	-0.0144	0.230887
rs4262914	15	84484897	A	G	0.01296	0.5393	0.398	1.66133	1.66133	0.1413	2.15335
rs2277849	15	84639350	T	C	-0.02299	0.2978	0.2347	0.00504567	-0.00504567	0.0631	-0.955871
rs6496318	15	85215229	T	C	0.005072	0.4888	0.4031	1.47011	1.47011	0.0857	1.30195
rs17197019	15	89079672	C	T	0.00717	0.5393	0.5204	-0.348331	-0.348331	0.0189	0.279037
rs8041863	15	89359689	A	T	0.02422	0.5169	0.4592	0.0386359	0.0386359	0.0577	0.873181
rs17199220	15	89368821	A	G	-0.01154	NA	NA	-0.902839	0.902839	NA	NA
rs883325	15	89383006	G	T	-0.007937	0.5449	0.4847	-0.0457932	0.0457932	0.0602	-0.911464
rs28662144	15	89549378	A	G	-8.704e-05	NA	NA	-0.109992	0.109992	NA	NA
rs2270132	15	91351868	C	A	-4.208e-05	0.4607	0.4796	-0.819721	0.819721	-0.0189	0.299795
rs7183056	15	94561153	T	C	0.01612	0.5112	0.551	-0.33191	-0.33191	-0.0398	-0.619837
rs2663126	15	99563857	A	G	-0.001576	NA	NA	0.0520622	-0.0520622	NA	NA
rs2581381	15	100509498	C	T	-0.000378	NA	NA	0.381851	-0.381851	NA	NA
rs11853226	15	100619440	A	G	0.02388	0.09551	0.09184	0.618188	0.618188	0.00367	0.0458194
rs78272777	16	2571234	C	G	-0.02066	NA	NA	0.313459	-0.313459	NA	NA
rs1684618	16	4756679	G	A	-0.01153	0.4775	0.4949	0.187357	-0.187357	-0.0174	0.276826
rs30232	16	14401962	A	G	0.01857	0.4944	0.602	-1.02528	-1.02528	-0.1076	-1.65806
rs3751877	16	15154898	C	T	-0.01281	0.1124	0.1122	-0.116589	0.116589	0.0002	0.00731673
rs4783865	16	55069693	A	G	-0.004602	0.4551	0.4796	1.36366	-1.36366	-0.0245	0.385548
rs3931036	16	70548297	A	G	-0.0232	0.90449	0.95918	-1.7271	1.7271	-0.05469	0.847848
rs8059411	16	75181554	C	T	0.01942	NA	NA	-1.43357	-1.43357	NA	NA
rs79950365	16	81550116	G	A	0.002428	NA	NA	1.42962	1.42962	NA	NA
rs2157696	17	10044114	A	G	-0.01359	0.4831	0.3418	-2.12734	2.12734	0.1413	-2.15335
rs2280777	17	18041507	T	C	-0.009253	0.5618	0.4286	0.988556	-0.988556	0.1332	-2.02931
rs542939	17	27889986	C	T	0.03559	0.6404	0.6276	-1.58134	-1.58134	0.0128	0.185627
rs13723	17	27941886	G	A	-0.01293	0.5	0.4388	-0.296191	0.296191	0.0612	-0.926777
rs79907227	17	28521136	G	A	-0.004532	NA	NA	-0.780192	0.780192	NA	NA
rs62070652	17	29221277	T	C	-0.03773	NA	NA	-0.597191	0.597191	NA	NA
rs4795613	17	29818894	G	A	-0.006637	NA	NA	-0.703374	0.703374	NA	NA
rs1009570	17	38596425	A	G	-0.01149	0.3539	0.3776	1.2515	-1.2515	-0.0237	0.373298
rs76679230	17	43253551	A	G	0.04254	NA	NA	-0.39637	-0.39637	NA	NA
rs6503426	17	43268267	T	C	0.01261	NA	NA	1.39349	1.39349	NA	NA
rs2291725	17	47039132	C	T	-0.01087	0.5506	0.5051	-1.44057	1.44057	0.0455	-0.686363
rs7209400	17	47450057	T	C	-0.01294	0.573	0.4745	-0.374128	0.374128	0.0985	-1.49795
rs1867088	17	47534574	G	A	-0.008342	0.5674	0.5306	1.34553	-1.34553	0.0368	-0.553139
rs4605213	17	49244747	C	G	0.008685	0.3258	0.2857	-0.131277	-0.131277	0.0401	0.603672
rs227731	17	54773238	G	T	-0.004048	0.4719	0.3367	-0.982217	0.982217	0.1352	-2.05994
rs4794665	17	54850329	G	A	-0.01406	0.5112	0.5561	-0.38948	0.38948	-0.0449	0.697933
rs9896616	17	59516472	C	T	0.01294	0.4382	0.4235	0.571211	0.571211	0.0147	0.214722
rs1476800	17	59608842	A	G	-0.02272	0.618	0.5204	-0.274093	0.274093	0.0976	-1.48417
rs728368	17	59675381	T	C	-0.001672	0.6067	0.6327	-0.604297	0.604297	-0.026	0.408518
rs2003549	17	62008437	T	C	0.02472	0.2921	0.2449	1.44188	1.44188	0.0472	0.712395
rs2058194	17	62020348	C	T	0.01923	0.5393	0.6327	-1.2264	-1.2264	-0.0934	-1.44061
rs2240308	17	63554591	A	G	-0.007168	0.5225	0.3724	0.803909	-0.803909	0.1501	-2.2881
rs12942924	17	63566399	T	A	-0.01053	0.5225	0.5	-1.55275	1.55275	0.0225	-0.334163
rs232095	17	63721867	G	A	0.002646	NA	NA	1.38891	1.38891	NA	NA
rs2072268	17	66303352	A	G	-0.01774	0.3989	0.4949	-0.546403	0.546403	-0.096	1.48043
rs2592208	17	67408873	A	C	-0.005757	0.5056	0.5051	0.598917	-0.598917	0.0005	0.00272283
rs180160	17	68026021	T	C	0.02446	0.4831	0.4184	0.532576	0.532576	0.0647	0.980372
rs4129767	17	76403984	A	G	0.009318	0.5112	0.4337	0.0900387	0.0900387	0.0775	1.17638
rs4789939	17	76881703	C	T	-0.0127	0.8596	0.8112	-0.796961	0.796961	0.0484	-0.73077
rs1805082	18	21120444	C	T	-0.01111	0.5843	0.3367	2.14392	-2.14392	0.2476	-3.78112
rs12962513	18	33042437	C	G	0.004859	0.382	0.3418	-0.356537	-0.356537	0.0402	0.605204
rs10853580	18	47054317	G	A	-0.0116	0.1685	0.1378	0.93467	-0.93467	0.0307	-0.45973
rs3897645	18	57728947	C	T	-0.00254	0.5674	0.5408	-0.301066	0.301066	0.0266	-0.396947
rs2613766	19	5066995	C	T	0.00212	0.4775	0.4847	-0.822803	-0.822803	-0.0072	-0.120633
rs2115386	19	7196565	T	C	-0.01564	0.4157	0.4898	0.486204	-0.486204	-0.0741	1.14507
rs4804416	19	7223848	G	T	-0.01109	0.3764	0.4184	-0.0259455	0.0259455	-0.042	0.653526
rs111644945	19	8625081	A	G	-0.03531	NA	NA	-1.99149	1.99149	NA	NA
rs4072910	19	8644031	C	G	-0.01742	0.4494	0.5	0.264641	-0.264641	-0.0506	0.785218
rs8108747	19	8668121	C	T	-0.01031	NA	NA	-0.859734	0.859734	NA	NA
rs7249094	19	8672000	A	G	-0.02719	0.427	0.4133	0.593089	-0.593089	0.0137	-0.199409
rs12986130	19	17279752	A	C	-0.006689	0.2921	0.3112	-0.15928	0.15928	-0.0191	0.302858
rs8108429	19	37636776	C	A	-0.004088	0.5618	0.4235	-0.572695	0.572695	0.1383	-2.10741
rs11699209	20	4088326	A	C	0.01112	NA	NA	-1.28262	-1.28262	NA	NA
rs6052360	20	4091972	T	C	0.01335	0.8371	0.852	-0.528269	-0.528269	-0.0149	-0.238543
rs1741344	20	4101800	T	C	-0.006724	0.6461	0.6939	-1.021	1.021	-0.0478	0.742341
rs6107580	20	5114251	A	G	-0.0195	NA	NA	-0.324539	0.324539	NA	NA
rs6038393	20	6230133	T	C	0.01172	0.1854	0.2857	0.267792	0.267792	-0.1003	-1.54627
rs6054274	20	6433261	C	T	-0.01641	NA	NA	-0.775137	0.775137	NA	NA
rs6077007	20	6454309	G	A	0.02097	0.08989	0.1684	0.295604	0.295604	-0.07851	-1.2126
rs6038571	20	6634566	C	A	-0.03218	0.5112	0.4745	0.091723	-0.091723	0.0367	-0.551608
rs11698104	20	6653623	A	G	-0.01149	NA	NA	-0.400061	0.400061	NA	NA
rs6085659	20	6686426	G	A	-0.009295	0.3764	0.4388	-0.0828644	0.0828644	-0.0624	0.965911
rs16992573	20	6708281	G	A	-0.001747	0.0618	0.1173	-0.567476	0.567476	-0.0555	0.860251
rs6057929	20	32477633	G	A	0.009085	0.4326	0.5867	-1.98273	-1.98273	-0.1541	-2.37011
rs6059844	20	33036482	G	A	0.01518	NA	NA	0.141349	0.141349	NA	NA
rs6088727	20	33713639	A	G	-0.01308	0.6685	0.6735	-2.16402	2.16402	-0.005	0.0869444
rs143384	20	34025756	G	A	0.0504	0.3764	0.4796	-0.872538	-0.872538	-0.1032	-1.59068
rs738703	20	34190699	T	C	-0.01387	0.7191	0.6684	-1.47309	1.47309	0.0507	-0.76599
rs113730848	20	34302957	G	C	0.02823	NA	NA	0.443162	0.443162	NA	NA
rs4142032	20	34751654	C	T	0.02868	0.05056	0.1071	0.101138	0.101138	-0.05654	-0.876177
rs1702766	20	35052815	G	T	-0.001687	0.4551	0.4184	0.378842	-0.378842	0.0367	-0.551608
rs2024594	20	47517794	G	A	0.0275	0.5281	0.5051	0.74704	0.74704	0.023	0.34182
rs6064362	20	54845796	A	G	-0.01043	0.6461	0.5612	-0.549342	0.549342	0.0849	-1.2897
rs2823559	21	17394903	G	A	-0.0176	NA	NA	-2.01898	2.01898	NA	NA
rs8128316	21	35721560	T	C	0.01608	0.4607	0.4133	0.955881	0.955881	0.0474	0.715457
rs1005640	22	20789074	C	T	0.01418	0.4326	0.4541	-0.651234	-0.651234	-0.0215	-0.339609
rs7286819	22	33108981	T	C	-0.03854	NA	NA	-0.615029	0.615029	NA	NA
rs2076198	22	41929175	G	T	-0.007917	0.4438	0.5306	0.571266	-0.571266	-0.0868	1.33955
rs4822220	22	43290583	C	T	-0.01256	0.4775	0.5	-0.526248	0.526248	-0.0225	0.354922
rs9754402	22	45814536	C	T	0.00721	0.4719	0.5459	-1.38486	-1.38486	-0.074	-1.14354

## Sheet: name map
Name in Supplementary File 1	Name in source data
GIANT	giant
UKB Neale (UKB)	ukb_neale1
UKB Neale new	ukb_neale2
UKB Loh	ukb_loh
UKB all no PCs	ukbsparse_all_nopcs
UKB all 10 PCs	ukbsparse_all_10pcs
UKB WB no PCs	ukbsparse_wb_nopcs
UKB WB 10 PCs	ukbsparse_wb_10pcs
NG2015 sibs	famest
UKB sibs all	ukbfam_all
UKB sibs WB	ukbfam_wb
