# Supplementary material for: Polygenic adaptation on height is overestimated due to uncorrected stratification in genome-wide association studies
Source: eLife. 2019 Mar 21;8:e39702. doi: 10.7554/eLife.39702 (PMC6428571; doi:10.7554/eLife.39702)
Supplement: Figure 4—source data 1. — This reference was updated from its bioRxiv version to its now published version. [file elife-39702-fig4-data1.xlsx]

## Sheet: Figure 4
name	clump	country	PRSmean	PRSse	numsamples	latitude
giant	clump_0.01	Austria	0.0515208	0.123571	14	47.5
giant	clump_0.01	Belgium	0.850037	0.0709984	43	50.5
giant	clump_0.01	Czech Republic	0.311871	0.139185	11	49.8
giant	clump_0.01	France	0.014843	0.0486783	92	46.2
giant	clump_0.01	Germany	0.823399	0.0537943	75	51.1
giant	clump_0.01	Hungary	-0.313778	0.106917	19	47.1
giant	clump_0.01	Ireland	0.690033	0.0591528	62	53.1
giant	clump_0.01	Italy	-1.4212	0.0313318	225	41.8
giant	clump_0.01	Netherlands	1.2366	0.111844	17	52.1
giant	clump_0.01	Poland	0.39362	0.0990026	22	51.9
giant	clump_0.01	Portugal	-0.930575	0.0405207	135	39.3
giant	clump_0.01	Romania	-0.87592	0.124398	14	45.9
giant	clump_0.01	Spain	-0.735749	0.0400694	137	40.4
giant	clump_0.01	Sweden	0.947138	0.138612	11	60.1
giant	clump_0.01	Swiss-French	0.083612	0.0169669	760	46.5
giant	clump_0.01	Swiss-German	0.285652	0.0509651	84	47.3
giant	clump_0.01	Switzerland	0.208648	0.0361998	168	46.8
giant	clump_0.01	United Kingdom	0.75906	0.0236138	390	55.3
giant	clump_0.01	Yugoslavia	-0.929841	0.0704602	44	43.9
giant	UKB_sig	Austria	-0.276059	0.212218	14	47.5
giant	UKB_sig	Belgium	0.527057	0.123743	43	50.5
giant	UKB_sig	Czech Republic	0.419185	0.236592	11	49.8
giant	UKB_sig	France	-0.063341	0.0851404	92	46.2
giant	UKB_sig	Germany	0.370777	0.0941735	75	51.1
giant	UKB_sig	Hungary	-0.143616	0.184184	19	47.1
giant	UKB_sig	Ireland	0.106598	0.103989	62	53.1
giant	UKB_sig	Italy	-0.274002	0.0547264	225	41.8
giant	UKB_sig	Netherlands	0.345595	0.192588	17	52.1
giant	UKB_sig	Poland	0.214191	0.171313	22	51.9
giant	UKB_sig	Portugal	-0.405962	0.0708261	135	39.3
giant	UKB_sig	Romania	0.112644	0.21276	14	45.9
giant	UKB_sig	Spain	-0.287396	0.0703174	137	40.4
giant	UKB_sig	Sweden	0.469268	0.237195	11	60.1
giant	UKB_sig	Swiss-French	0.0104994	0.0298613	760	46.5
giant	UKB_sig	Swiss-German	0.0474752	0.0892584	84	47.3
giant	UKB_sig	Switzerland	0.112221	0.0636186	168	46.8
giant	UKB_sig	United Kingdom	0.153171	0.0416146	390	55.3
giant	UKB_sig	Yugoslavia	-0.0301333	0.1226	44	43.9
ukb_neale1	clump_0.01	Austria	-0.157609	0.200552	14	47.5
ukb_neale1	clump_0.01	Belgium	0.509951	0.115743	43	50.5
ukb_neale1	clump_0.01	Czech Republic	0.389383	0.225709	11	49.8
ukb_neale1	clump_0.01	France	-0.0459085	0.0793822	92	46.2
ukb_neale1	clump_0.01	Germany	0.349039	0.0878411	75	51.1
ukb_neale1	clump_0.01	Hungary	-0.187787	0.173863	19	47.1
ukb_neale1	clump_0.01	Ireland	0.0175216	0.096509	62	53.1
ukb_neale1	clump_0.01	Italy	-0.0796063	0.0510101	225	41.8
ukb_neale1	clump_0.01	Netherlands	0.652594	0.181888	17	52.1
ukb_neale1	clump_0.01	Poland	-0.298	0.161005	22	51.9
ukb_neale1	clump_0.01	Portugal	-0.446839	0.0659186	135	39.3
ukb_neale1	clump_0.01	Romania	-0.00354464	0.201464	14	45.9
ukb_neale1	clump_0.01	Spain	-0.283638	0.0653672	137	40.4
ukb_neale1	clump_0.01	Sweden	0.119719	0.225196	11	60.1
ukb_neale1	clump_0.01	Swiss-French	-0.00541338	0.0277125	760	46.5
ukb_neale1	clump_0.01	Swiss-German	0.211074	0.0832763	84	47.3
ukb_neale1	clump_0.01	Switzerland	0.166064	0.0590956	168	46.8
ukb_neale1	clump_0.01	United Kingdom	0.0699784	0.0386002	390	55.3
ukb_neale1	clump_0.01	Yugoslavia	-0.0226334	0.11477	44	43.9
ukb_neale1	UKB_sig	Austria	-0.103165	0.212694	14	47.5
ukb_neale1	UKB_sig	Belgium	0.53351	0.123961	43	50.5
ukb_neale1	UKB_sig	Czech Republic	0.185688	0.236524	11	49.8
ukb_neale1	UKB_sig	France	-0.110205	0.0855028	92	46.2
ukb_neale1	UKB_sig	Germany	0.324988	0.0945664	75	51.1
ukb_neale1	UKB_sig	Hungary	-0.268684	0.185019	19	47.1
ukb_neale1	UKB_sig	Ireland	0.0428405	0.10417	62	53.1
ukb_neale1	UKB_sig	Italy	-0.132683	0.0549453	225	41.8
ukb_neale1	UKB_sig	Netherlands	0.285223	0.193078	17	52.1
ukb_neale1	UKB_sig	Poland	0.111891	0.171573	22	51.9
ukb_neale1	UKB_sig	Portugal	-0.291871	0.0709406	135	39.3
ukb_neale1	UKB_sig	Romania	0.26206	0.213684	14	45.9
ukb_neale1	UKB_sig	Spain	-0.246269	0.0705679	137	40.4
ukb_neale1	UKB_sig	Sweden	0.445931	0.238392	11	60.1
ukb_neale1	UKB_sig	Swiss-French	-0.00465704	0.0299723	760	46.5
ukb_neale1	UKB_sig	Swiss-German	0.0154119	0.0897128	84	47.3
ukb_neale1	UKB_sig	Switzerland	0.120216	0.0638981	168	46.8
ukb_neale1	UKB_sig	United Kingdom	0.0889181	0.0417271	390	55.3
ukb_neale1	UKB_sig	Yugoslavia	-0.0191963	0.123256	44	43.9
ukbfam_wb	clump_0.01	Austria	-0.386554	0.256804	14	47.5
ukbfam_wb	clump_0.01	Belgium	0.392969	0.148468	43	50.5
ukbfam_wb	clump_0.01	Czech Republic	0.201363	0.289338	11	49.8
ukbfam_wb	clump_0.01	France	0.00104908	0.102051	92	46.2
ukbfam_wb	clump_0.01	Germany	-0.0254405	0.112632	75	51.1
ukbfam_wb	clump_0.01	Hungary	-0.26592	0.223314	19	47.1
ukbfam_wb	clump_0.01	Ireland	0.11751	0.123635	62	53.1
ukbfam_wb	clump_0.01	Italy	-0.167674	0.0655621	225	41.8
ukbfam_wb	clump_0.01	Netherlands	0.172501	0.232645	17	52.1
ukbfam_wb	clump_0.01	Poland	-0.112583	0.206591	22	51.9
ukbfam_wb	clump_0.01	Portugal	0.0249867	0.0845446	135	39.3
ukbfam_wb	clump_0.01	Romania	-0.399423	0.258467	14	45.9
ukbfam_wb	clump_0.01	Spain	-0.0130344	0.0839285	137	40.4
ukbfam_wb	clump_0.01	Sweden	-0.159459	0.287802	11	60.1
ukbfam_wb	clump_0.01	Swiss-French	-0.0321382	0.0355148	760	46.5
ukbfam_wb	clump_0.01	Swiss-German	-0.00709122	0.106994	84	47.3
ukbfam_wb	clump_0.01	Switzerland	0.173702	0.075803	168	46.8
ukbfam_wb	clump_0.01	United Kingdom	0.0954383	0.0494739	390	55.3
ukbfam_wb	clump_0.01	Yugoslavia	-0.283526	0.147298	44	43.9
ukbfam_wb	UKB_sig	Austria	-0.174678	0.244459	14	47.5
ukbfam_wb	UKB_sig	Belgium	0.566516	0.142197	43	50.5
ukbfam_wb	UKB_sig	Czech Republic	0.181215	0.27297	11	49.8
ukbfam_wb	UKB_sig	France	0.0520049	0.0982578	92	46.2
ukbfam_wb	UKB_sig	Germany	0.143336	0.1085	75	51.1
ukbfam_wb	UKB_sig	Hungary	0.0396732	0.210902	19	47.1
ukbfam_wb	UKB_sig	Ireland	0.0545856	0.120231	62	53.1
ukbfam_wb	UKB_sig	Italy	-0.0568662	0.0632661	225	41.8
ukbfam_wb	UKB_sig	Netherlands	0.310724	0.22281	17	52.1
ukbfam_wb	UKB_sig	Poland	0.245813	0.198149	22	51.9
ukbfam_wb	UKB_sig	Portugal	-0.122846	0.0815721	135	39.3
ukbfam_wb	UKB_sig	Romania	-0.110636	0.245562	14	45.9
ukbfam_wb	UKB_sig	Spain	-0.0650018	0.080976	137	40.4
ukbfam_wb	UKB_sig	Sweden	0.454146	0.272312	11	60.1
ukbfam_wb	UKB_sig	Swiss-French	-0.0459508	0.0344888	760	46.5
ukbfam_wb	UKB_sig	Swiss-German	-0.0230125	0.103737	84	47.3
ukbfam_wb	UKB_sig	Switzerland	0.0638522	0.0737435	168	46.8
ukbfam_wb	UKB_sig	United Kingdom	0.0283566	0.0480198	390	55.3
ukbfam_wb	UKB_sig	Yugoslavia	-0.0991798	0.140163	44	43.9
ukbsparse_all_nopcs	clump_0.01	Austria	-0.0535082	0.0796521	14	47.5
ukbsparse_all_nopcs	clump_0.01	Belgium	0.589999	0.0441543	43	50.5
ukbsparse_all_nopcs	clump_0.01	Czech Republic	0.121968	0.0902831	11	49.8
ukbsparse_all_nopcs	clump_0.01	France	0.256705	0.0301598	92	46.2
ukbsparse_all_nopcs	clump_0.01	Germany	0.460151	0.0332956	75	51.1
ukbsparse_all_nopcs	clump_0.01	Hungary	-0.561299	0.0687773	19	47.1
ukbsparse_all_nopcs	clump_0.01	Ireland	0.62741	0.0365454	62	53.1
ukbsparse_all_nopcs	clump_0.01	Italy	-1.61679	0.0197483	225	41.8
ukbsparse_all_nopcs	clump_0.01	Netherlands	1.10528	0.0704893	17	52.1
ukbsparse_all_nopcs	clump_0.01	Poland	0.17515	0.0628198	22	51.9
ukbsparse_all_nopcs	clump_0.01	Portugal	-0.913426	0.0254388	135	39.3
ukbsparse_all_nopcs	clump_0.01	Romania	-1.35476	0.081377	14	45.9
ukbsparse_all_nopcs	clump_0.01	Spain	-0.497038	0.0250336	137	40.4
ukbsparse_all_nopcs	clump_0.01	Sweden	0.615445	0.0896547	11	60.1
ukbsparse_all_nopcs	clump_0.01	Swiss-French	0.230343	0.0104412	760	46.5
ukbsparse_all_nopcs	clump_0.01	Swiss-German	0.303242	0.0315769	84	47.3
ukbsparse_all_nopcs	clump_0.01	Switzerland	0.229378	0.0223298	168	46.8
ukbsparse_all_nopcs	clump_0.01	United Kingdom	0.620133	0.0144618	390	55.3
ukbsparse_all_nopcs	clump_0.01	Yugoslavia	-1.10245	0.044832	44	43.9
ukbsparse_all_nopcs	UKB_sig	Austria	-0.372102	0.236712	14	47.5
ukbsparse_all_nopcs	UKB_sig	Belgium	0.479502	0.138293	43	50.5
ukbsparse_all_nopcs	UKB_sig	Czech Republic	-0.0915506	0.264021	11	49.8
ukbsparse_all_nopcs	UKB_sig	France	0.143742	0.0952424	92	46.2
ukbsparse_all_nopcs	UKB_sig	Germany	0.21611	0.105397	75	51.1
ukbsparse_all_nopcs	UKB_sig	Hungary	-0.358098	0.205507	19	47.1
ukbsparse_all_nopcs	UKB_sig	Ireland	0.318101	0.11634	62	53.1
ukbsparse_all_nopcs	UKB_sig	Italy	-0.434616	0.0611577	225	41.8
ukbsparse_all_nopcs	UKB_sig	Netherlands	0.449618	0.216292	17	52.1
ukbsparse_all_nopcs	UKB_sig	Poland	0.241784	0.190891	22	51.9
ukbsparse_all_nopcs	UKB_sig	Portugal	-0.437903	0.0793936	135	39.3
ukbsparse_all_nopcs	UKB_sig	Romania	-0.418216	0.237776	14	45.9
ukbsparse_all_nopcs	UKB_sig	Spain	-0.298669	0.0784682	137	40.4
ukbsparse_all_nopcs	UKB_sig	Sweden	0.635106	0.262972	11	60.1
ukbsparse_all_nopcs	UKB_sig	Swiss-French	0.0216563	0.033365	760	46.5
ukbsparse_all_nopcs	UKB_sig	Swiss-German	0.0231215	0.0998855	84	47.3
ukbsparse_all_nopcs	UKB_sig	Switzerland	0.143958	0.0711252	168	46.8
ukbsparse_all_nopcs	UKB_sig	United Kingdom	0.242555	0.0464601	390	55.3
ukbsparse_all_nopcs	UKB_sig	Yugoslavia	-0.231953	0.135645	44	43.9

## Sheet: name map
Name in Supplementary File 1	Name in source data
GIANT	giant
UKB Neale (UKB)	ukb_neale1
UKB Neale new	ukb_neale2
UKB Loh	ukb_loh
UKB all no PCs	ukbsparse_all_nopcs
UKB all 10 PCs	ukbsparse_all_10pcs
UKB WB no PCs	ukbsparse_wb_nopcs
UKB WB 10 PCs	ukbsparse_wb_10pcs
NG2015 sibs	famest
UKB sibs all	ukbfam_all
UKB sibs WB	ukbfam_wb
